# Supplementary material for: Lead Optimization of the 5-Phenylpyrazolopyrimidinone NPD-2975 toward Compounds with Improved Antitrypanosomal Efficacy
Source: PubMed Central journal article supplement (PMC10895668; doi:10.1021/acs.jmedchem.3c01976), 2024-02-08
Supplement: jm3c01976_si_001.pdf [file jm3c01976_si_001.pdf]

## Supporting information

### Lead optimization of the 5-phenylpyrazolopyrimidinone NPD-2975 towards compounds with improved antitrypanosomal efficacy

Yang Zheng,<sup>a,1</sup> Magali van den Kerkhof,<sup>b,1</sup> Mohamed Ibrahim,<sup>a</sup> Iwan J.P. de Esch,<sup>a</sup> Louis Maes,<sup>b</sup> Geert Jan Sterk,<sup>a</sup> Guy Caljon<sup>b,\*</sup> and Rob Leurs<sup>a,\*</sup>

<sup>a</sup> Amsterdam Institute of Molecular and Life Sciences, Division of Medicinal Chemistry, Faculty of Science, Vrije Universiteit Amsterdam, De Boelelaan 1108, 1081 HZ Amsterdam, the Netherlands.

<sup>b</sup> Laboratory of Microbiology, Parasitology and Hygiene (LMPH), University of Antwerp, Universiteitsplein 1, 2610 Wilrijk, Belgium.

<sup>1</sup> Authors contributed equally to this manuscript.

\* Corresponding author: guy.caljon@uantwerpen.be (Guy Caljon); r.leurs@vu.nl (Rob Leurs).

#### Table of contents

|                                                                                                                                   |             |
|-----------------------------------------------------------------------------------------------------------------------------------|-------------|
| Table S1. <i>In vitro</i> metabolism: intrinsic clearance of <b>11</b> , <b>31a-c</b> and <b>35</b> in comparison with <b>2</b> . | Page S2     |
| Table S2. Measured brain concentrations of <b>31c</b> in the pharmacokinetic experiments at 24 h after treatment.                 | Page S3     |
| Figure S1. Detection of parasite infection by SL-RNA detection by qPCR                                                            | Page S4     |
| Figure S2-S141. LCMS, <sup>1</sup> H NMR, <sup>13</sup> C NMR and 1D NOESY spectroscopy data.                                     | Page S5-101 |

Table S1. *In vitro* metabolism: intrinsic clearance of **11**, **31a-c** and **35** in comparison with **2**.

| Species | Phase<br>I/II | Time | <b>2 (%)</b> |       | <b>11 (%)</b> |       | <b>31a (%)</b> |       | <b>31b (%)</b> |       | <b>31c (%)</b> |       | <b>35 (%)</b> |       |
|---------|---------------|------|--------------|-------|---------------|-------|----------------|-------|----------------|-------|----------------|-------|---------------|-------|
|         |               |      | Mean         | STEDV | Mean          | STEDV | Mean           | STEDV | Mean           | STEDV | Mean           | STEDV | Mean          | STEDV |
| Mouse   | I             | 0    | 100          | -     | 100           | -     | 100            | -     | 100            | -     | 100            | -     | 100           | -     |
|         |               | 15   | 73           | 3.9   | 69            | 3     | 2.7            | 1     | 43             | 11    | 108            | 11.8  | 113           | 7.5   |
|         |               | 30   | 55           | 2.6   | 54            | 1.5   | 0.8            | 0.02  | 22             | 6.4   | 105            | 3     | 110           | 5.9   |
|         |               | 60   | 33           | 4.8   | 31            | 0.4   | 0.6            | 0.2   | 7              | 1.8   | 105            | 8.8   | 110           | 3.6   |
|         | II            | 0    | 100          | -     | 100           | -     | 100            | -     | 100            | -     | 100            | -     | 100           | -     |
|         |               | 15   | 93           | 6     | 102           | 2.4   | 85             | 13.4  | 107            | 0.7   | 94             | 1.2   | 56            | 2     |
|         |               | 30   | 81           | 3.9   | 108           | 15    | 83             | 15.2  | 99             | 11.3  | 95             | 8.7   | 25            | 3.4   |
|         |               | 60   | 71           | 7.6   | 97            | 8.9   | 70             | 4.2   | 83             | 0.1   | 90             | 11    | 10            | 1.5   |
| Human   | I             | 0    | 100          | -     | 100           | -     | 100            | -     | 100            | -     | 100            | -     | 100           | -     |
|         |               | 15   | 100          | 12    | 97            | 2.8   | 96             | 4.5   | 89             | 4.4   | 112            | 10.1  | 113           | 2.5   |
|         |               | 30   | 101          | 5.6   | 93            | 2.8   | 103            | 13.6  | 90             | 3.9   | 117            | 13.7  | 107           | 4     |
|         |               | 60   | 93           | 8.5   | 91            | 5.5   | 87             | 3.5   | 86             | 5.8   | 114            | 7     | 109           | 7     |
|         | II            | 0    | 100          | -     | 100           | -     | 100            | -     | 100            | -     | 100            | -     | 100           | -     |
|         |               | 15   | 74           | 0.8   | 100           | 5.1   | 81             | 0.7   | 99             | 12.9  | 100            | 3.5   | 82            | 8.4   |
|         |               | 30   | 75           | 6.2   | 98            | 1.7   | 79             | 3.3   | 118            | 3     | 96             | 8.9   | 67            | 8     |
|         |               | 60   | 69           | 2     | 99            | 3.8   | 82             | 10.8  | 95             | 0.6   | 99             | 7.7   | 46            | 0.1   |



Table S2. Measured brain concentrations of **31c** in the pharmacokinetic experiments at 24 h after treatment.

| Compound   | Administration route | Mouse | Brain levels (ng/mL) | Stdev | Brain levels ( $\mu$ M) | Stdev |
|------------|----------------------|-------|----------------------|-------|-------------------------|-------|
| <b>31c</b> | PO                   | m1    | 24                   | 23    | 0.088                   | 0.083 |
|            |                      | m2    | 188                  | 80    | 0.690                   | 0.294 |
|            |                      | m3    | 30                   | 28    | 0.111                   | 0.103 |
|            | IP                   | m1    | 11                   | 4     | 0.040                   | 0.016 |
|            |                      | m2    | 8                    | -     | 0.029                   | -     |
|            |                      | m3    | 91                   | 101   | 0.335                   | 0.370 |

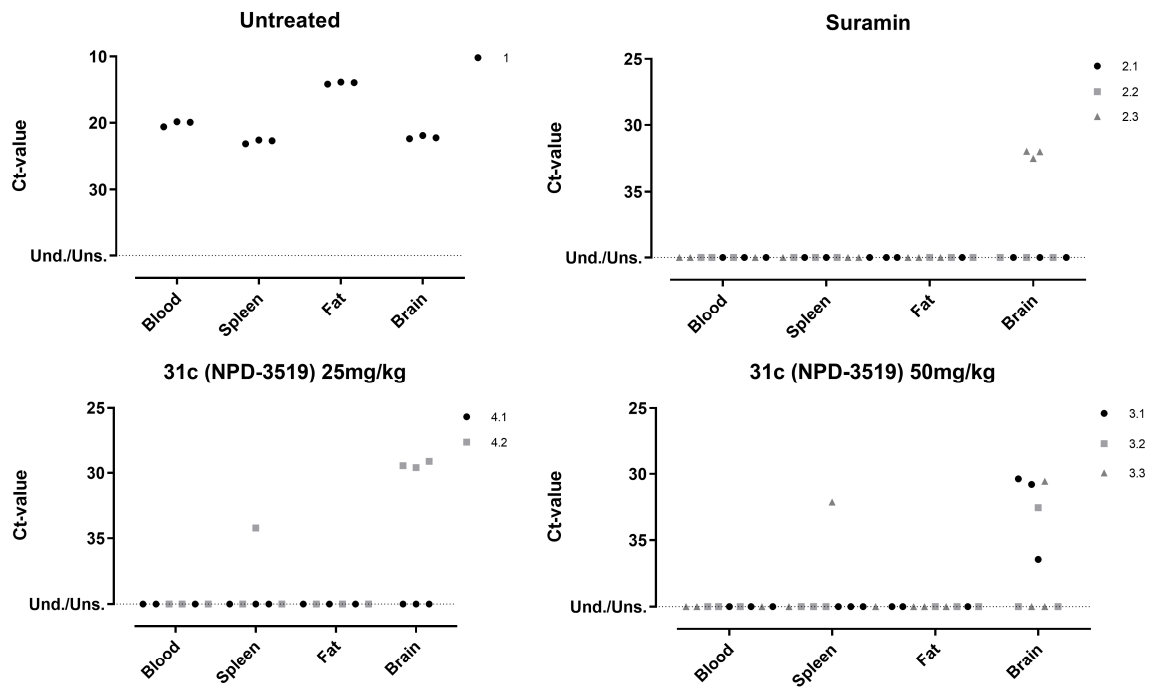

Figure S1. Ct-values of the SL-RNA qPCR of various organs collected from treated animals after infection with *T. brucei*. Results are expressed as the Ct-value for each individual measurement. Results were obtained from three independent repeats. Und./Uns.: Undetected or unspecific.

Acquired by : Admin  
 Date Acquired : 20/8/2018 4:45:22 PM  
 Sample Name : YAZH01-240-1  
 Sample ID :  
 Tray# : 1  
 Vial# : 17  
 Injection Volume : 2  
 Data File : C:\LabSolutions\Data\2018\2018-wk34\YAZH01-240-1.lcd  
 Background File : blanco 200818.lcd  
 Method File : Method SCAN ACID standard.lcm  
 Report Format : DefaultL.CMS.lcr  
 Tuning File : C:\LabSolutions\Tuning\Tuning-ESI-pos-neg01072015a.lct  
 Processed by : Admin  
 Modified Date : 21/8/2018 9:01:55 AM

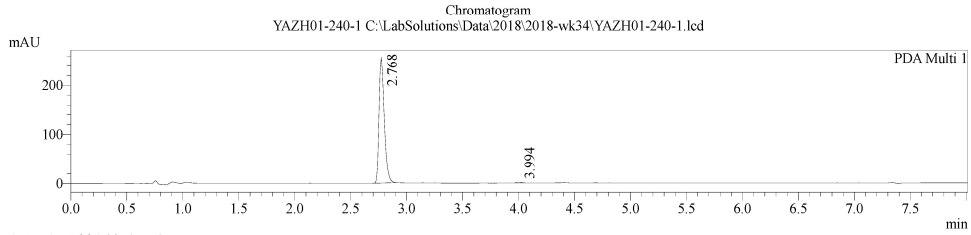

1 - PDA Multi 1 / 254nm 4nm

| Peak# | Name | Ret. Time | Area   | Area % |
|-------|------|-----------|--------|--------|
| 1     |      | 2.768     | 833110 | 99.270 |
| 2     |      | 3.994     | 6128   | 0.730  |

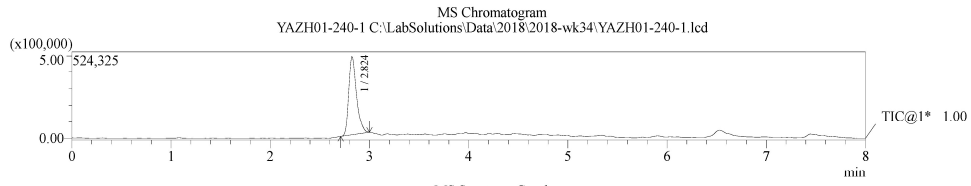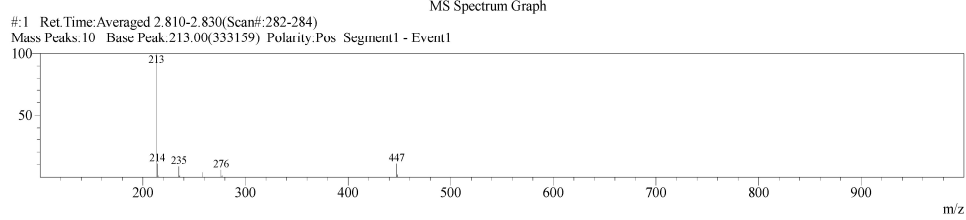

MS Spectrum Table

#1 Ret.Time:  
BG Mode: Calc 2.710-<->3.000(272-<->301)  
Mass Peaks: 10 Base Peak: 213.00(333159) Polarity: Pos Segment1 - Event1

| # | m/z    | Abs.Inten. | Rel.Inten. | Charge | Polarity | Monoisotopic | #  | m/z    | Abs.Inten. | Rel.Inten. | Charge | Polarity | Monoisotopic |
|---|--------|------------|------------|--------|----------|--------------|----|--------|------------|------------|--------|----------|--------------|
| 1 | 213.00 | 333159     | 100.00     |        |          |              | 6  | 258.15 | 12526      | 3.76       |        |          |              |
| 2 | 214.05 | 35617      | 10.69      |        |          |              | 7  | 276.10 | 19140      | 5.75       |        |          |              |
| 3 | 215.10 | 3891       | 1.17       |        |          |              | 8  | 277.15 | 3742       | 1.12       |        |          |              |
| 4 | 235.10 | 28364      | 8.51       |        |          |              | 9  | 447.25 | 35732      | 10.73      |        |          |              |
| 5 | 236.00 | 3950       | 1.19       |        |          |              | 10 | 448.15 | 6737       | 2.02       |        |          |              |

Figure S2. LCMS spectrum of compound 4.

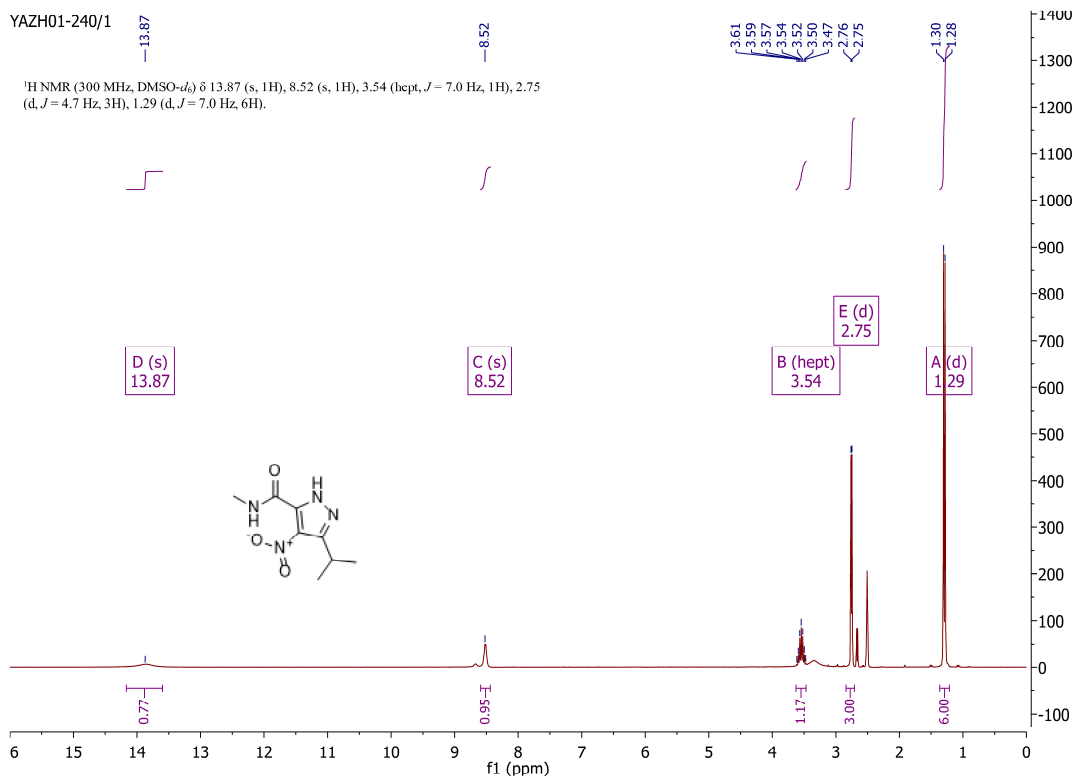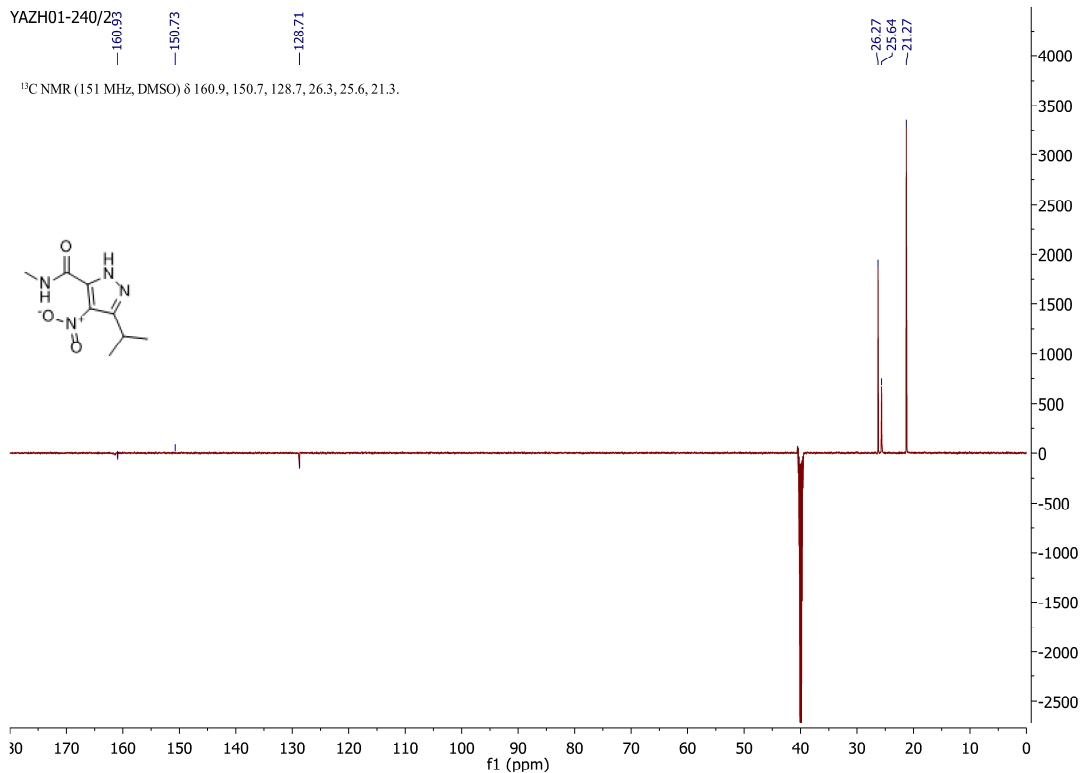

Acquired by : Admin  
 Date Acquired : 4/6/2019 12:23:28 PM  
 Sample Name : YAZH01-246  
 Sample ID :  
 Tray# : 1  
 Vial# : 14  
 Injection Volume : 2  
 Data File : C:\LabSolutions\Data\2019\2019-wk23\YAZH01-246.lcd  
 Background File :  
 Method File : Method SCAN BASE standard.lcm  
 Report Format : DefaultLCMS.lcr  
 Tuning File : C:\LabSolutions\Tuning\Tuning-ESI-pos-neg01072015a.lct  
 Processed by : Admin  
 Modified Date : 4/6/2019 1:37:50 PM

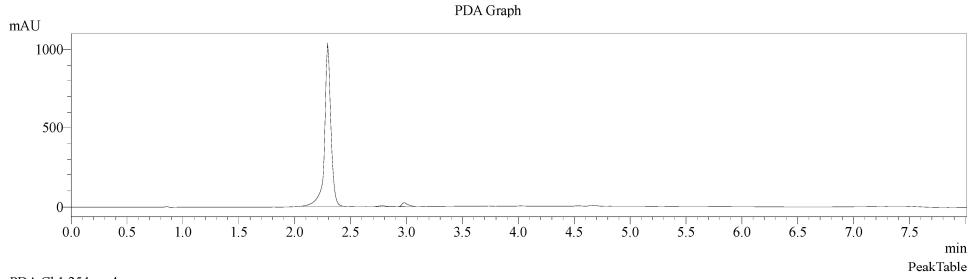

PDA Ch1 254nm 4nm

| Peak# | Name | Ret. Time | Area    | Area % |
|-------|------|-----------|---------|--------|
| 1     |      | 2.289     | 4043163 | 97.221 |
| 2     |      | 2.779     | 28032   | 0.674  |
| 3     |      | 2.974     | 87555   | 2.105  |

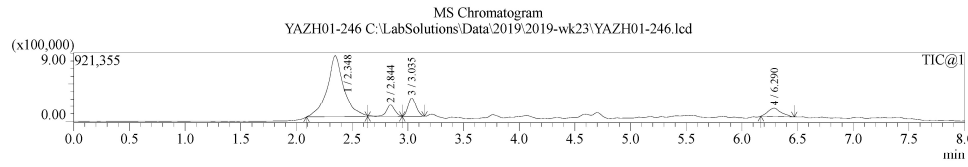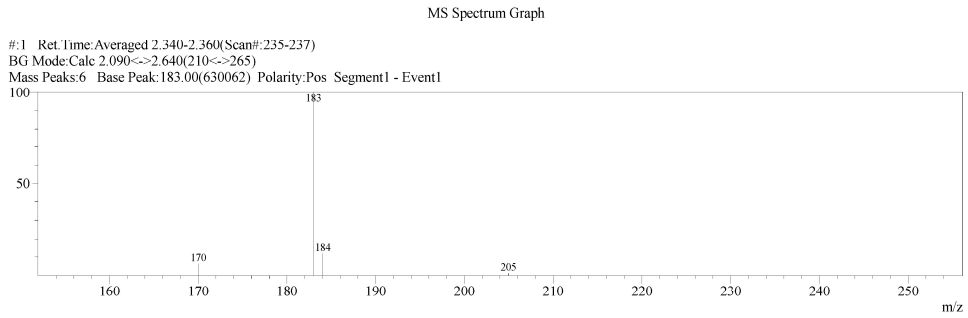

MS Spectrum Table

#1 Ret Time:  
 BG Mode: Calc 2.090-<->2.640(210-<->265)  
 Mass Peaks: 6 Base Peak: 183.00(630062) Polarity: Pos Segment1 - Event1

| # | m/z    | Abs.Inten. | Rel.Inten. | Charge | Polarity | Monoisotopic | # | m/z    | Abs.Inten. | Rel.Inten. | Charge | Polarity | Monoisotopic |
|---|--------|------------|------------|--------|----------|--------------|---|--------|------------|------------|--------|----------|--------------|
| 1 | 151.95 | 17274      | 2.74       |        |          |              | 4 | 184.05 | 75227      | 11.94      |        |          |              |
| 2 | 170.00 | 40497      | 6.43       |        |          |              | 5 | 204.95 | 7757       | 1.23       |        |          |              |
| 3 | 183.00 | 630062     | 100.00     |        |          |              | 6 | 256.15 | 16405      | 2.60       |        |          |              |

Figure S5. LCMS spectrum of compound 5.

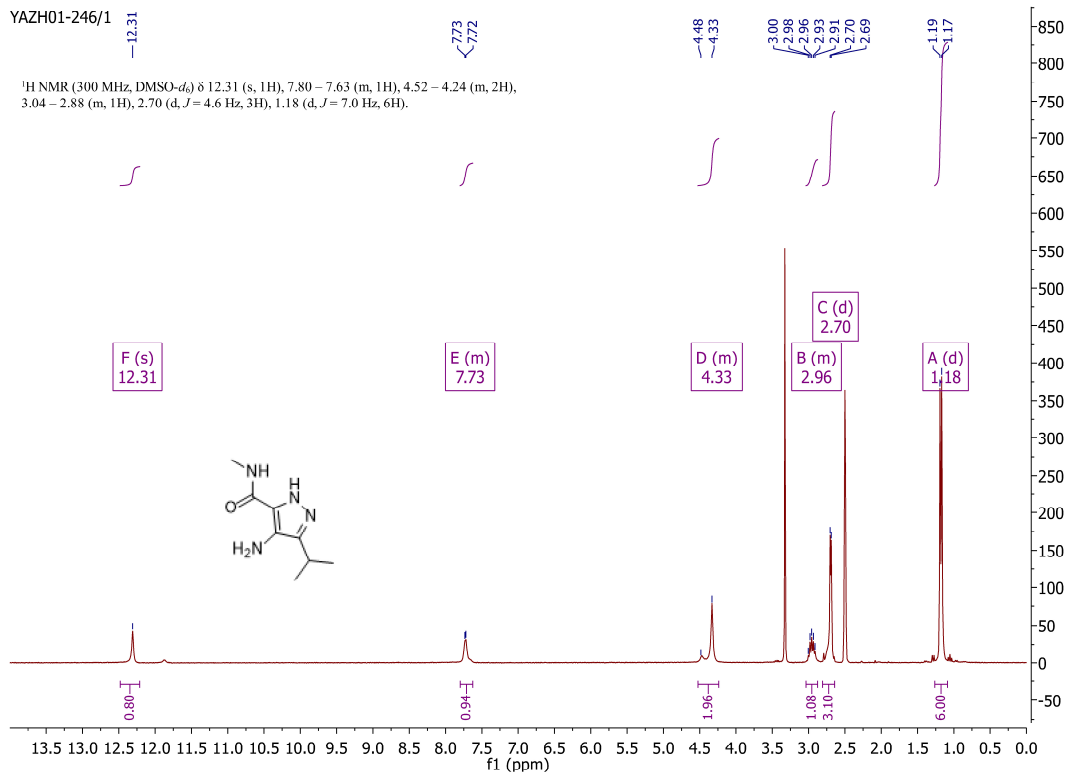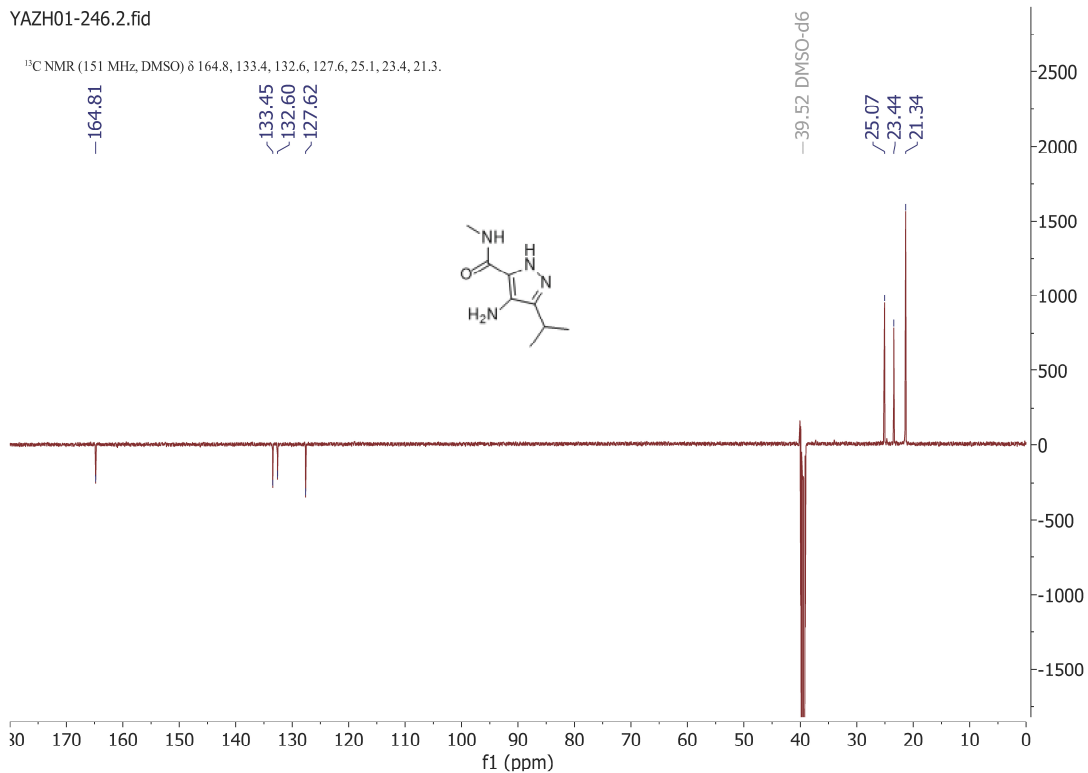

Acquired by : Admin  
 Date Acquired : 13/3/2019 4:10:07 PM  
 Sample Name : YAZH\_28\_20190313  
 Sample ID :  
 Tray# : 1  
 Vial# : 18  
 Injection Volume : 2  
 Data File : C:\LabSolutions\Data\2019\2019-wk10\YAZH\_28\_20190313.lcd  
 Background File : blanco\_13032019.lcd  
 Method File : Method SCAN ACID standard.lcm  
 Report Format : DefaultL.CMS.lcr  
 Tuning File : C:\LabSolutions\Tuning\Tuning-ESI-pos-neg01072015a.lct  
 Processed by : Admin  
 Modified Date : 13/3/2019 4:23:24 PM

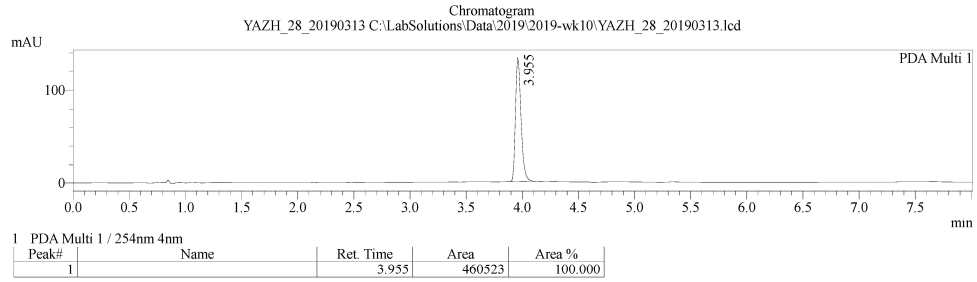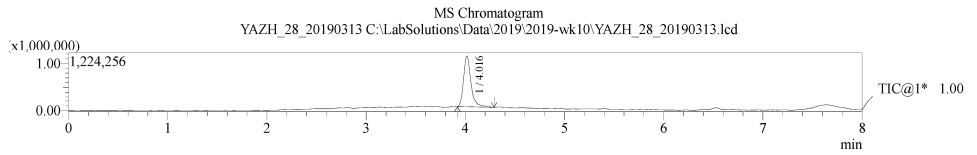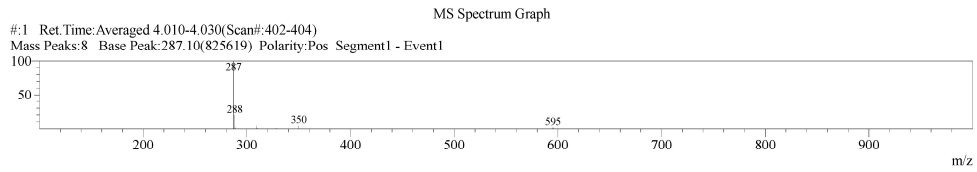

MS Spectrum Table

#1 Ret Time:  
BG Mode: Calc 3.920-<->4.290(393-<->430)  
Mass Peaks: 8 Base Peak: 287.10(825619) Polarity: Pos Segment1 - Event1

| # | m/z    | Abs.Inten. | Rel.Inten. | Charge | Polarity | Monoisotopic | # | m/z    | Abs.Inten. | Rel.Inten. | Charge | Polarity | Monoisotopic |
|---|--------|------------|------------|--------|----------|--------------|---|--------|------------|------------|--------|----------|--------------|
| 1 | 287.10 | 825619     | 100.00     |        |          |              | 5 | 310.00 | 9548       | 1.16       |        |          |              |
| 2 | 288.10 | 162597     | 19.69      |        |          |              | 6 | 328.10 | 9457       | 1.15       |        |          |              |
| 3 | 289.10 | 14314      | 1.73       |        |          |              | 7 | 350.10 | 35884      | 4.35       |        |          |              |
| 4 | 309.05 | 36108      | 4.37       |        |          |              | 8 | 595.30 | 14294      | 1.73       |        |          |              |

Figure S8. LCMS spectrum of compound 7.

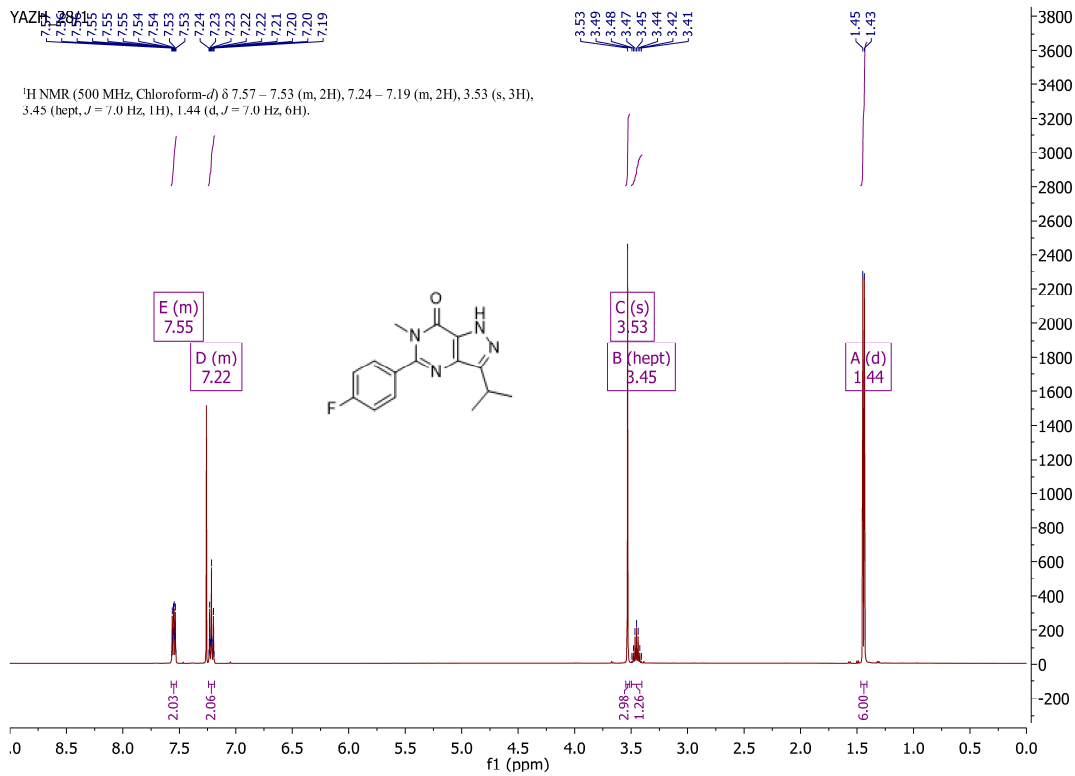

Figure S9.  $^1\text{H NMR}$  spectrum of compound 7.

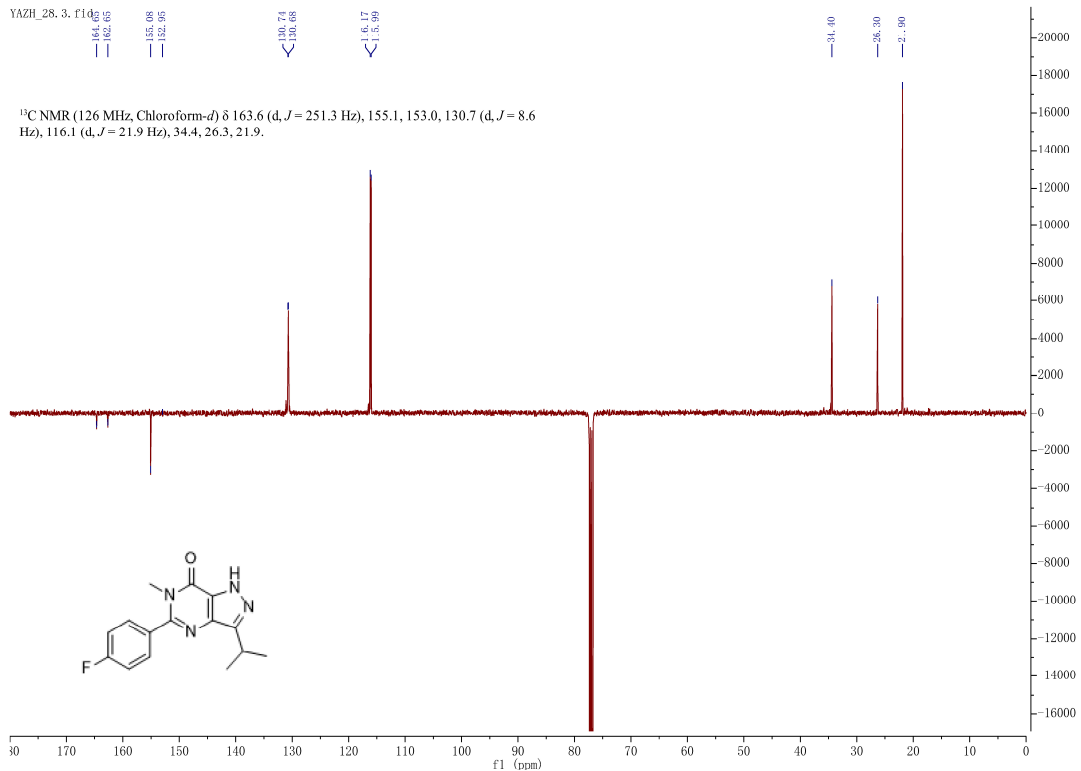

Figure S10.  $^{13}\text{C NMR}$  spectrum of compound 7.



Acquired by : Admin  
 Date Acquired : 3/9/2018 2:19:49 PM  
 Sample Name : YAZH01-248-1  
 Sample ID :  
 Tray# : 1  
 Vial# : 13  
 Injection Volume : 1  
 Data File : C:\LabSolutions\Data\2018\2018-wk36\YAZH01-248-1.lcd  
 Background File : blanco 03092018.lcd  
 Method File : Method SCAN ACID standard MW50.lcm  
 Report Format : DefaultL.CMS.lcr  
 Tuning File : C:\LabSolutions\Tuning\Tuning-ESI-pos-neg01072015a.lct  
 Processed by : Admin  
 Modified Date : 3/9/2018 2:52:36 PM

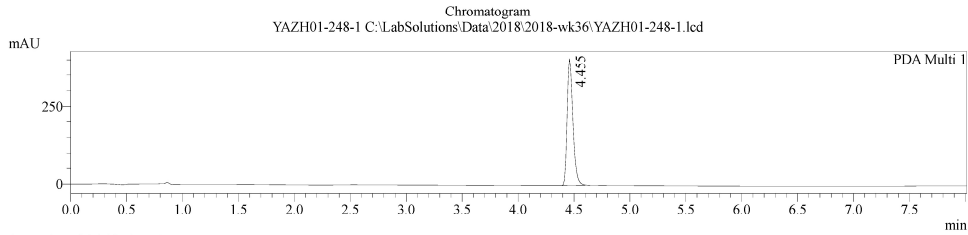

1 | PDA Multi 1 / 254nm 4nm

| Peak# | Name | Ret. Time | Area    | Area %  |
|-------|------|-----------|---------|---------|
| 1     |      | 4.455     | 1443459 | 100.000 |

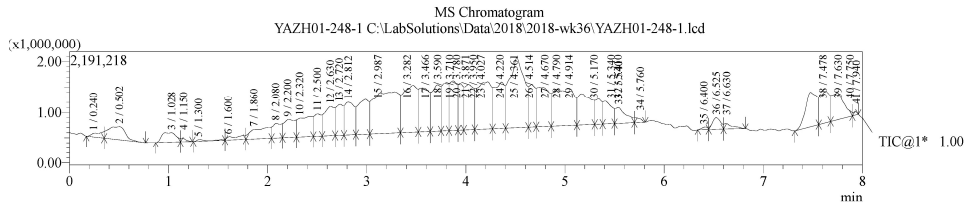

#1 Ret.Time:Averaged 4.500-4.520(Scan#:451-453)  
Mass Peaks:11 Base Peak:228.05(343753) Polarity:Pos Segment1 - Event1

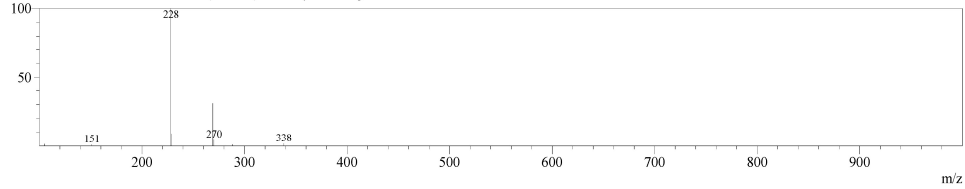

MS Spectrum Table

#1 Ret.Time:  
BG Mode:Calc 4.400-<->4.630(441<->464)  
Mass Peaks:11 Base Peak:228.05(343753) Polarity:Pos Segment1 - Event1

| # | m/z    | Abs.Inten. | Rel.Inten. | Charge | Polarity | Monoisotopic | #  | m/z    | Abs.Inten. | Rel.Inten. | Charge | Polarity | Monoisotopic |
|---|--------|------------|------------|--------|----------|--------------|----|--------|------------|------------|--------|----------|--------------|
| 1 | 59.05  | 9624       | 2.80       |        |          |              | 7  | 229.05 | 31162      | 9.07       |        |          |              |
| 2 | 83.05  | 95735      | 27.85      |        |          |              | 8  | 269.15 | 106700     | 31.04      |        |          |              |
| 3 | 84.05  | 3885       | 1.13       |        |          |              | 9  | 270.15 | 15272      | 4.44       |        |          |              |
| 4 | 105.05 | 5189       | 1.51       |        |          |              | 10 | 288.30 | 3630       | 1.06       |        |          |              |
| 5 | 151.00 | 3535       | 1.03       |        |          |              | 11 | 338.30 | 5872       | 1.71       |        |          |              |
| 6 | 228.05 | 343753     | 100.00     |        |          |              |    |        |            |            |        |          |              |

Figure S11. LCMS spectrum of compound 8.

YAZH01-248-1/7

$^1\text{H}$  NMR (600 MHz, Chloroform-*d*)  $\delta$  3.98 (s, 3H), 3.96 (s, 3H), 3.43 (hept,  $J = 7.1$  Hz, 1H), 1.30 (d,  $J = 6.9$  Hz, 6H).

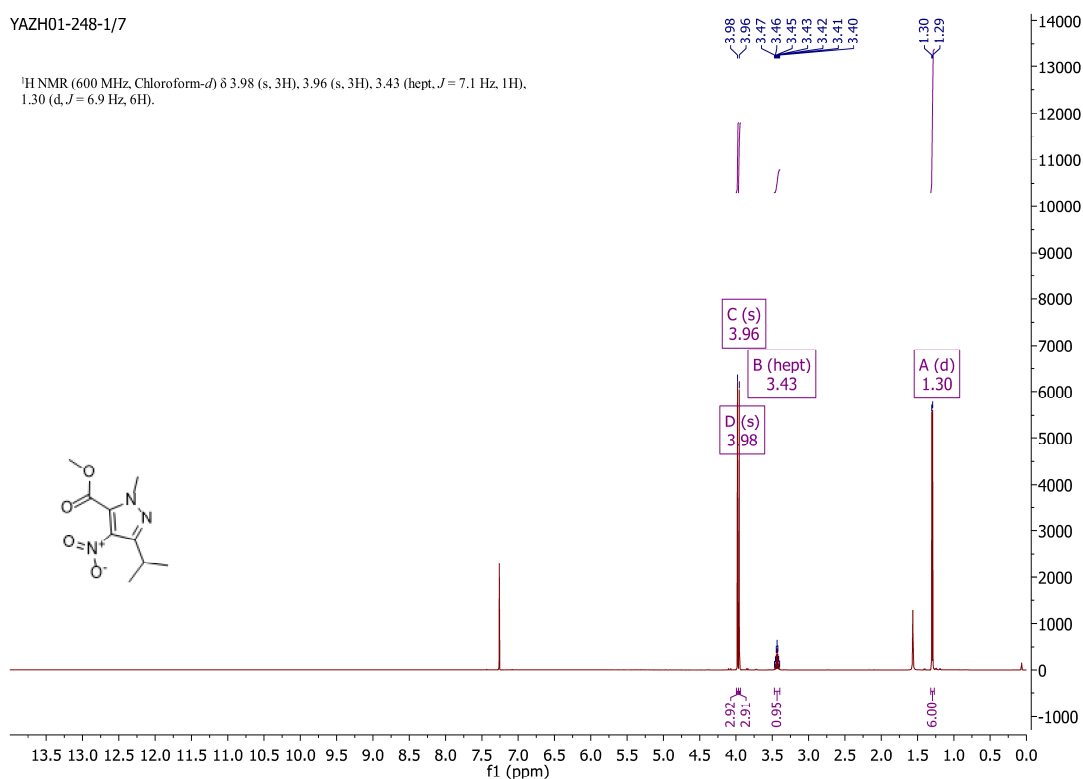

Figure S12.  $^1\text{H}$  NMR spectrum of compound 8.

YAZH01-248-1/8

$^{13}\text{C}$  NMR (151 MHz,  $\text{CDCl}_3$ )  $\delta$  159.3, 153.3, 132.1, 131.9, 53.7, 39.2, 26.5, 21.5.

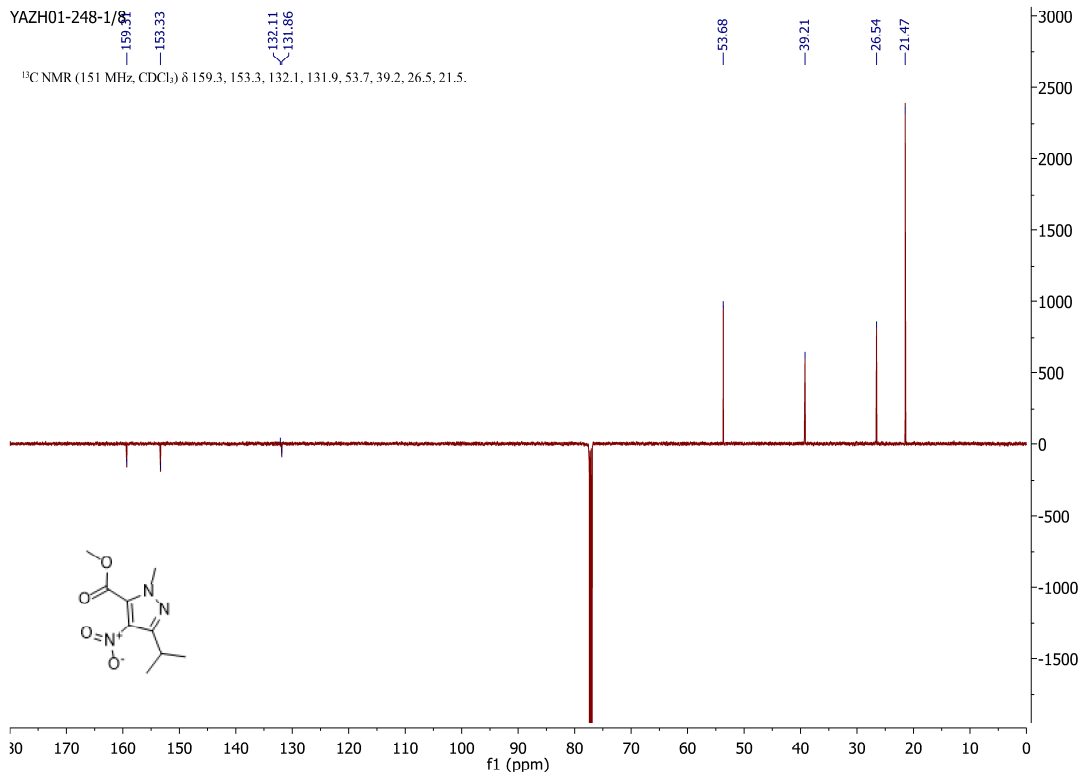

Figure S13.  $^{13}\text{C}$  NMR spectrum of compound 8.

YAZH01-248-1 1D NOE/2  
YAZH01-248-1 1D NOE

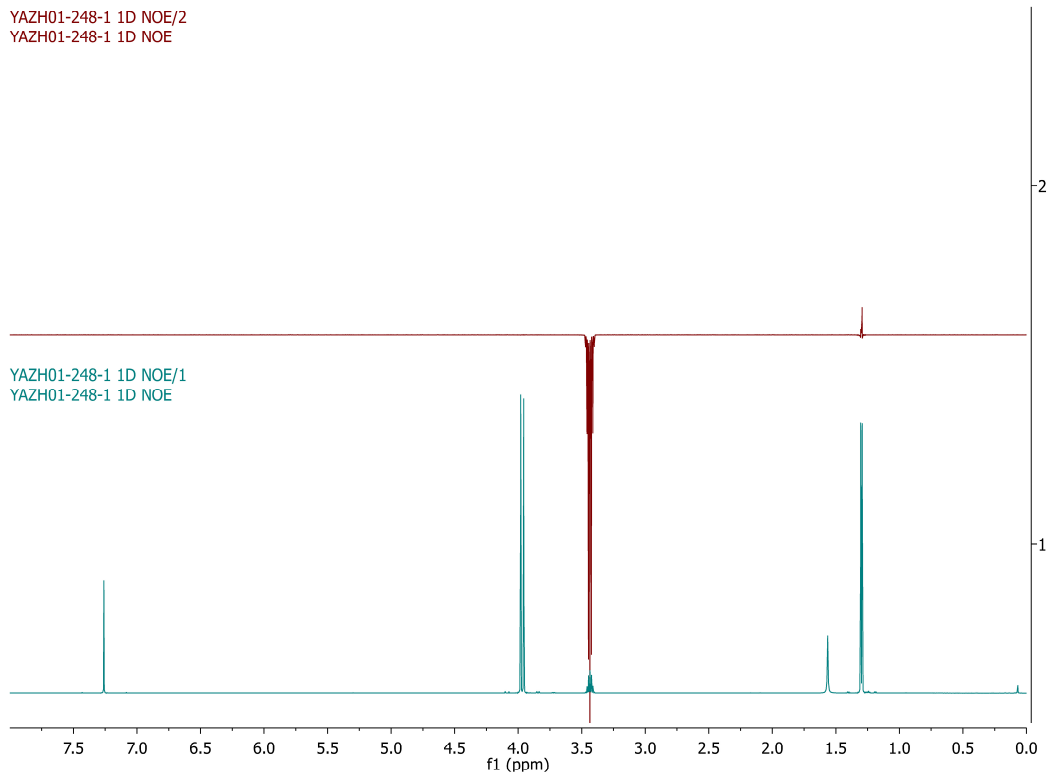

Figure S14. 1D NOESY spectrum of compound **8**.

Acquired by : Admin  
 Date Acquired : 3/9/2018 2:38:23 PM  
 Sample Name : YAZH01-248-2  
 Sample ID :  
 Tray# : 1  
 Vial# : 14  
 Injection Volume : 1  
 Data File : C:\LabSolutions\Data\2018\2018-wk36\YAZH01-248-2.lcd  
 Background File : blanco 03092018.lcd  
 Method File : Method SCAN ACID standard MW50.lcm  
 Report Format : Default.LCMS.lcr  
 Tuning File : C:\LabSolutions\Tuning\Tuning-ESI-pos-01072015a.lct  
 Processed by : Admin  
 Modified Date : 3/9/2018 2:53:35 PM

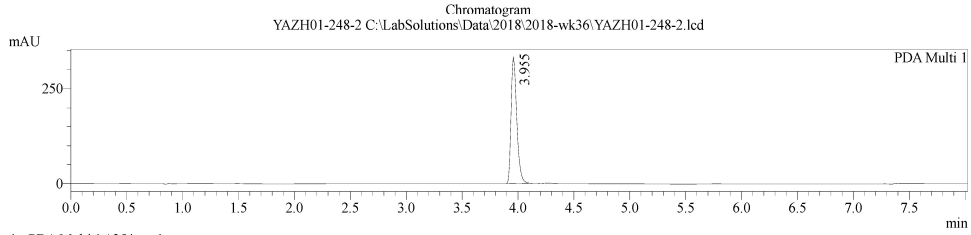

1: PDA Multi 1 / 254nm 4nm

| Peak# | Name | Ret. Time | Area    | Area %  |
|-------|------|-----------|---------|---------|
| 1     |      | 3.955     | 1168339 | 100.000 |

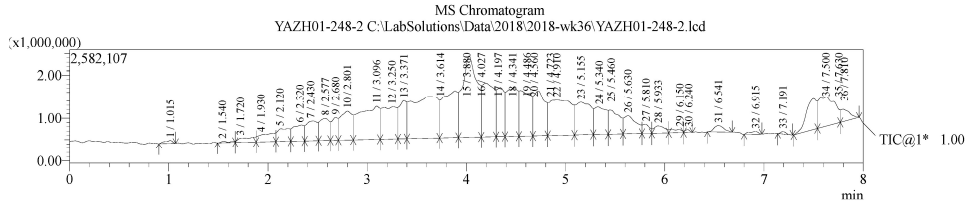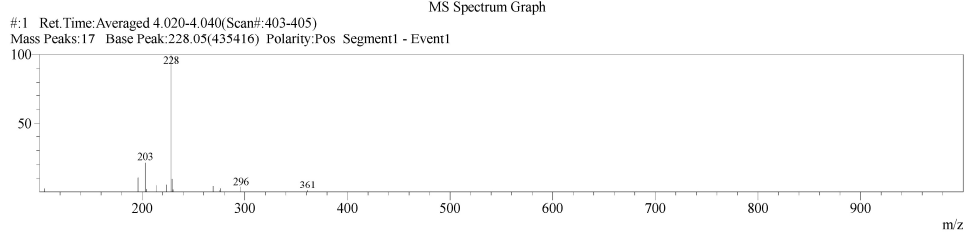

MS Spectrum Table

#1 Ret.Time:  
BG Mode:Calc 3.920<>4.150(393<>416)  
Mass Peaks:17 Base Peak:228.05(435416) Polarity:Pos Segment1 - Event1

| # | m/z    | Abs.Inten. | Rel.Inten. | Charge | Polarity | Monoisotopic | #  | m/z    | Abs.Inten. | Rel.Inten. | Charge | Polarity | Monoisotopic |
|---|--------|------------|------------|--------|----------|--------------|----|--------|------------|------------|--------|----------|--------------|
| 1 | 59.05  | 11139      | 2.56       |        |          |              | 10 | 228.05 | 435416     | 100.00     |        |          |              |
| 2 | 83.05  | 30697      | 7.05       |        |          |              | 11 | 229.10 | 43077      | 9.89       |        |          |              |
| 3 | 105.05 | 10233      | 2.35       |        |          |              | 12 | 230.05 | 7305       | 1.68       |        |          |              |
| 4 | 196.00 | 47038      | 10.80      |        |          |              | 13 | 269.15 | 17962      | 4.13       |        |          |              |
| 5 | 203.00 | 93195      | 21.40      |        |          |              | 14 | 275.50 | 4931       | 1.13       |        |          |              |
| 6 | 204.20 | 8468       | 1.94       |        |          |              | 15 | 276.10 | 10672      | 2.45       |        |          |              |
| 7 | 214.10 | 23006      | 5.28       |        |          |              | 16 | 296.10 | 15696      | 3.60       |        |          |              |
| 8 | 223.50 | 18131      | 4.16       |        |          |              | 17 | 361.10 | 4417       | 1.01       |        |          |              |
| 9 | 223.60 | 24965      | 5.73       |        |          |              |    |        |            |            |        |          |              |

Figure S15. LCMS spectrum of compound 12.

YAZH01-248-2/1

$^1\text{H}$  NMR (600 MHz, Chloroform-*d*)  $\delta$  3.94 (s, 3H), 3.94 (s, 3H), 3.48 (hept.,  $J = 7.2$  Hz, 1H), 1.40 (d,  $J = 7.2$  Hz, 6H).

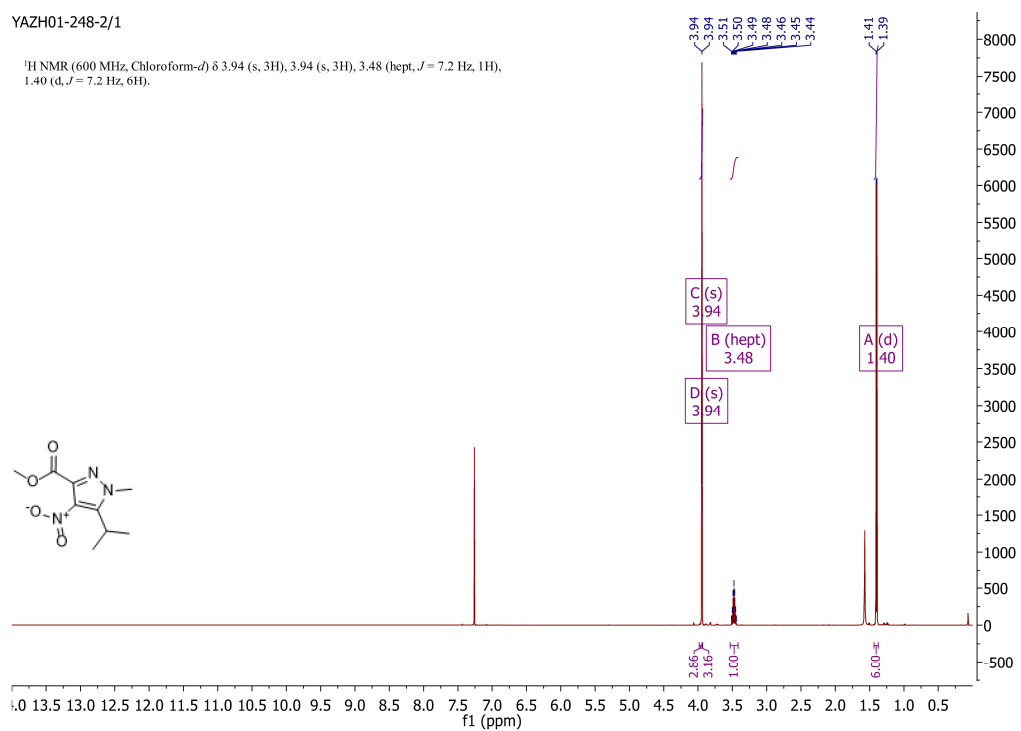

Figure S16.  $^1\text{H}$  NMR spectrum of compound **12**.

YAZH01-248-2/2

$^{13}\text{C}$  NMR (151 MHz,  $\text{CDCl}_3$ )  $\delta$  160.8, 146.3, 137.4, 132.1, 53.1, 39.1, 25.8, 19.4.

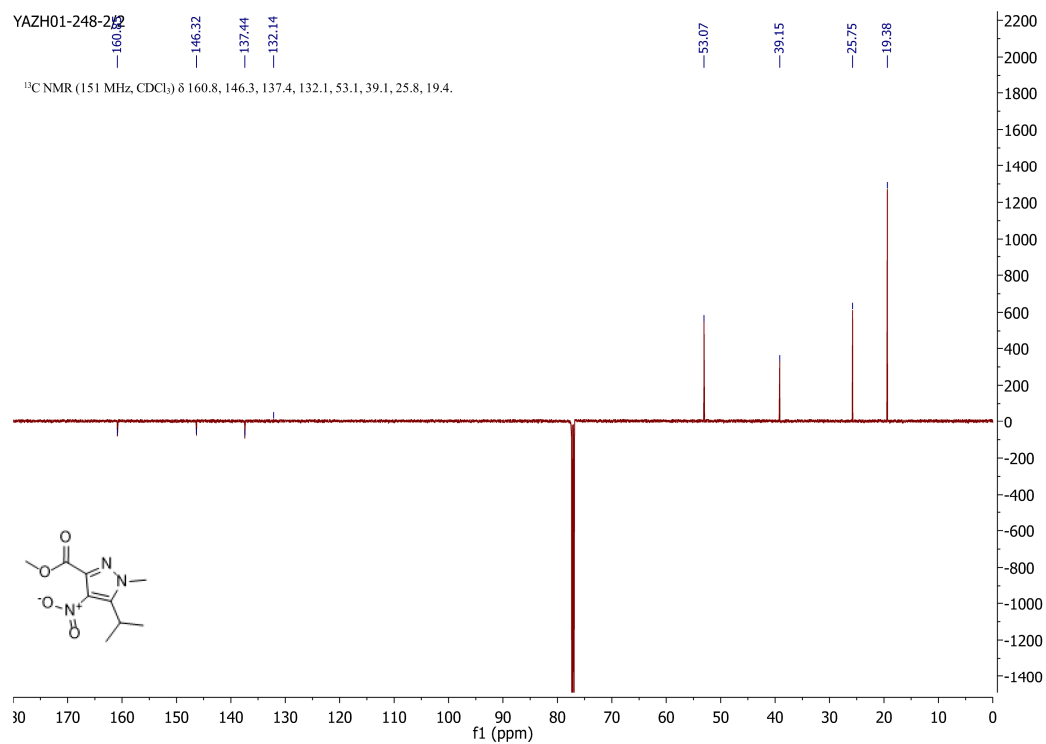

Figure S17.  $^{13}\text{C}$  NMR spectrum of compound **12**.

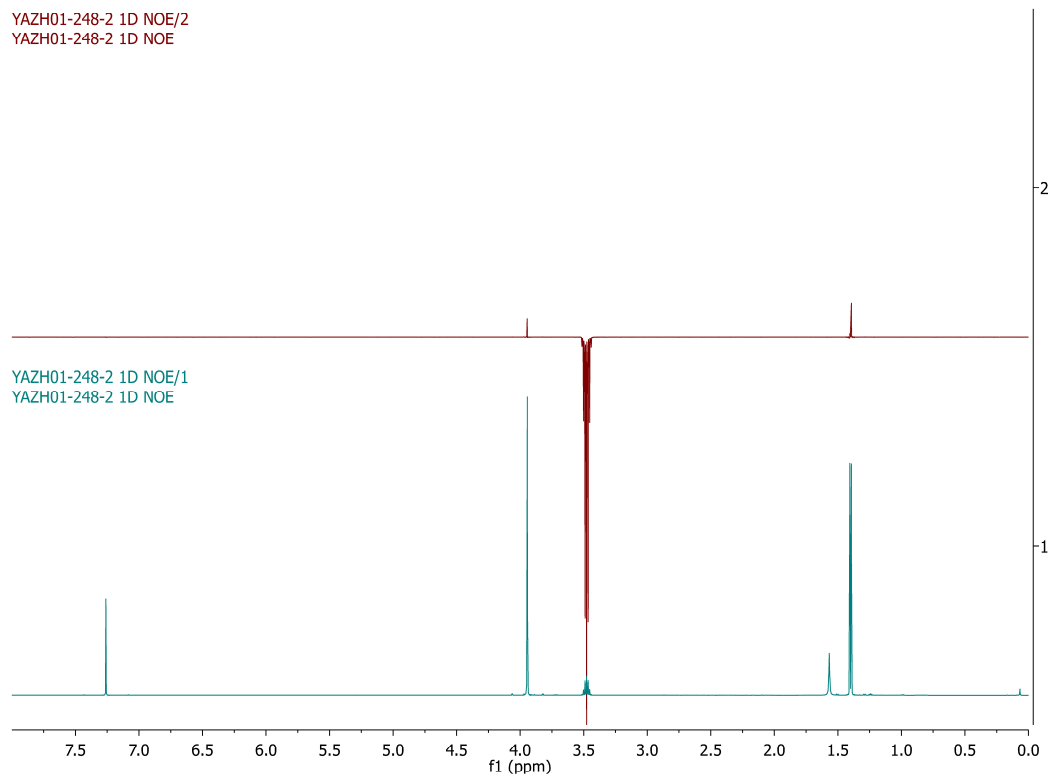

Figure S18. 1D NOESY spectrum of compound **12**.

Acquired by : Admin  
 Date Acquired : 13/9/2018 4:39:27 PM  
 Sample Name : YAZH01-257  
 Sample ID :  
 Tray# : 1  
 Vial# : 27  
 Injection Volume : 1  
 Data File : C:\LabSolutions\Data\2018\2018-wk37\YAZH01-257.lcd  
 Background File : blanco 13092018.lcd  
 Method File : Method SCAN ACID standard MW100.lcm  
 Report Format : Default.LCMS.lcr  
 Tuning File : C:\LabSolutions\Tuning\Tuning-ESI-pos-neg01072015a.lct  
 Processed by : Admin  
 Modified Date : 13/9/2018 5:21:56 PM

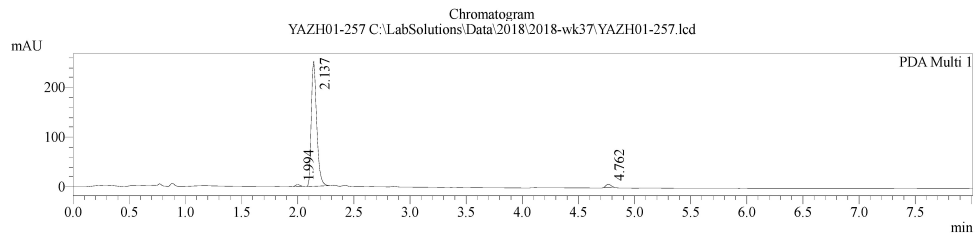

#1 PDA Multi 1 / 254nm 4nm

| Peak# | Name | Ret. Time | Area   | Area % |
|-------|------|-----------|--------|--------|
| 1     |      | 1.994     | 10665  | 1.228  |
| 2     |      | 2.137     | 838126 | 96.509 |
| 3     |      | 4.762     | 19653  | 2.263  |

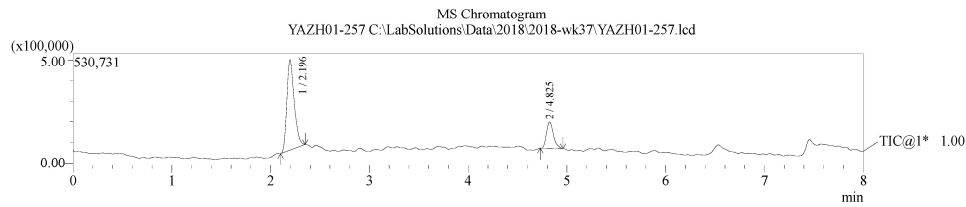

#1 Ret.Time:Averaged 2.190-2.210(Scan#:220-222)

Mass Peaks:7 Base Peak:183.05(315118) Polarity:Pos Segment1 - Event1

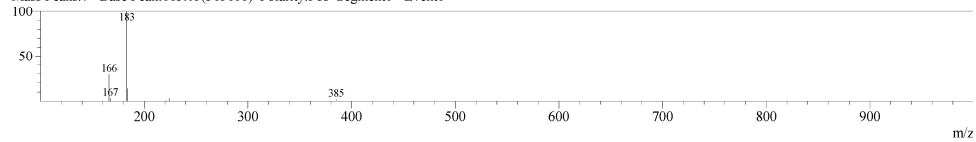

MS Spectrum Table

#1 Ret.Time:

BG Mode:Calc 2.100<->2.350(211<->236)

Mass Peaks:7 Base Peak:183.05(315118) Polarity:Pos Segment1 - Event1

| # | m/z    | Abs.Inten. | Rel.Inten. | Charge | Polarity | Monoisotopic | # | m/z    | Abs.Inten. | Rel.Inten. | Charge | Polarity | Monoisotopic |
|---|--------|------------|------------|--------|----------|--------------|---|--------|------------|------------|--------|----------|--------------|
| 1 | 166.00 | 92920      | 29.49      |        |          |              | 5 | 221.10 | 3883       | 1.23       |        |          |              |
| 2 | 167.10 | 9564       | 3.04       |        |          |              | 6 | 224.05 | 9755       | 3.10       |        |          |              |
| 3 | 183.05 | 315118     | 100.00     |        |          |              | 7 | 385.15 | 6722       | 2.13       |        |          |              |
| 4 | 184.05 | 44037      | 13.97      |        |          |              |   |        |            |            |        |          |              |

Figure S19. LCMS spectrum of compound 10.

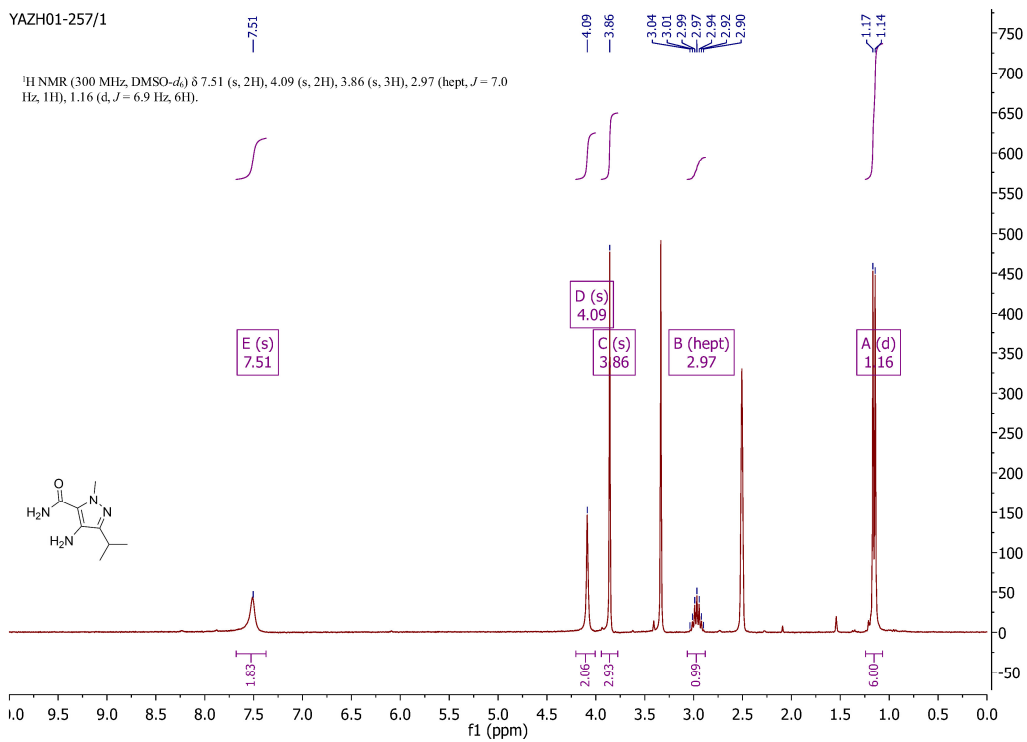

Figure S20. <sup>1</sup>H NMR spectrum of compound 10.

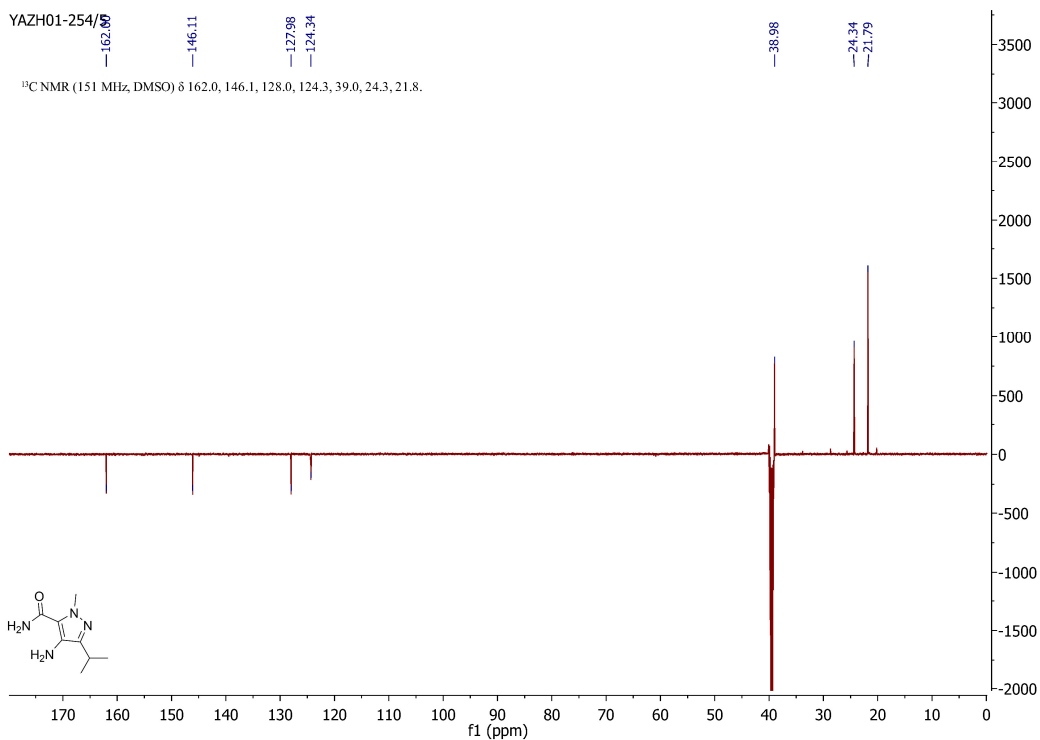

Figure S21. <sup>13</sup>C NMR spectrum of compound 10.



Acquired by : Admin  
 Date Acquired : 9/10/2018 10:39:03 AM  
 Sample Name : YAZH01-262  
 Sample ID :  
 Tray# : 1  
 Vial# : 6  
 Injection Volume : 3  
 Data File : C:\LabSolutions\Data\2018\2018-wk41\YAZH01-262.lcd  
 Background File : blanco 09102018.lcd  
 Method File : Method SCAN ACID standard.lcm  
 Report Format : DefaultL.CMS.lcr  
 Tuning File : C:\LabSolutions\Tuning\Tuning-ESI-pos-neg01072015a.lct  
 Processed by : Admin  
 Modified Date : 9/10/2018 11:37:02 AM

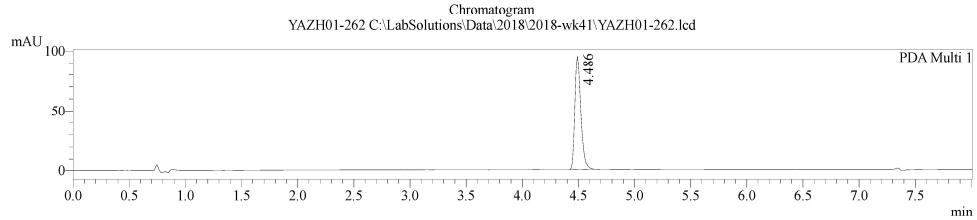

1 PDA Multi 1 / 254nm 4nm  
PDA Ch1 254nm 4nm

| Peak# | Name | Ret. Time | Area   | Area %  |
|-------|------|-----------|--------|---------|
| 1     |      | 4.486     | 351625 | 100.000 |

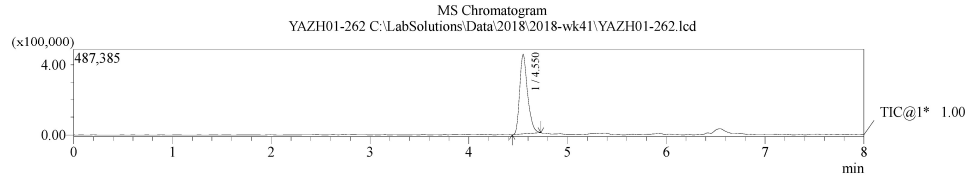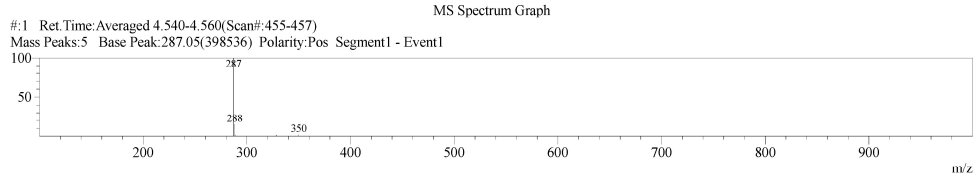

MS Spectrum Table  
#1 Ret Time:  
BG Mode Calc 4.440->4.730(445->474)  
Mass Peaks: 5 Base Peak: 287.05(398536) Polarity: Pos Segment1 - Event1

| # | m/z    | Abs.Inten. | Rel.Inten. | Charge | Polarity | Monoisotopic | # | m/z    | Abs.Inten. | Rel.Inten. | Charge | Polarity | Monoisotopic |
|---|--------|------------|------------|--------|----------|--------------|---|--------|------------|------------|--------|----------|--------------|
| 1 | 287.05 | 398536     | 100.00     |        |          |              | 4 | 328.15 | 5201       | 1.31       |        |          |              |
| 2 | 288.15 | 60500      | 15.18      |        |          |              | 5 | 350.10 | 7664       | 1.92       |        |          |              |
| 3 | 289.30 | 5307       | 1.33       |        |          |              |   |        |            |            |        |          |              |

Figure S22. LCMS spectrum of compound 11.

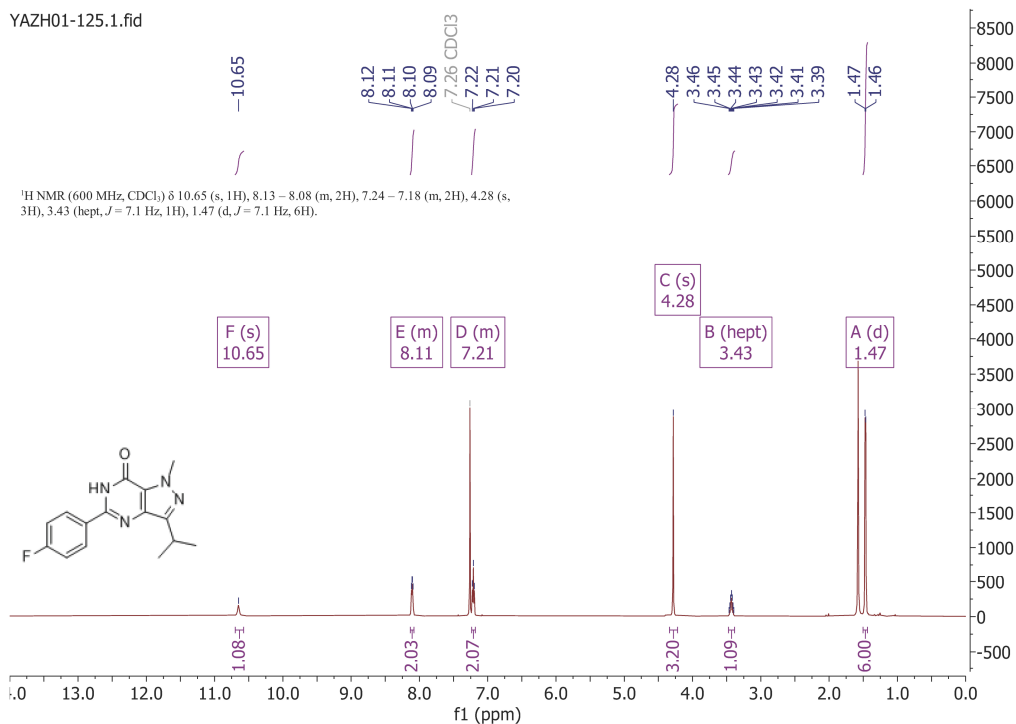

Figure S23. <sup>1</sup>H NMR spectrum of compound **11**.

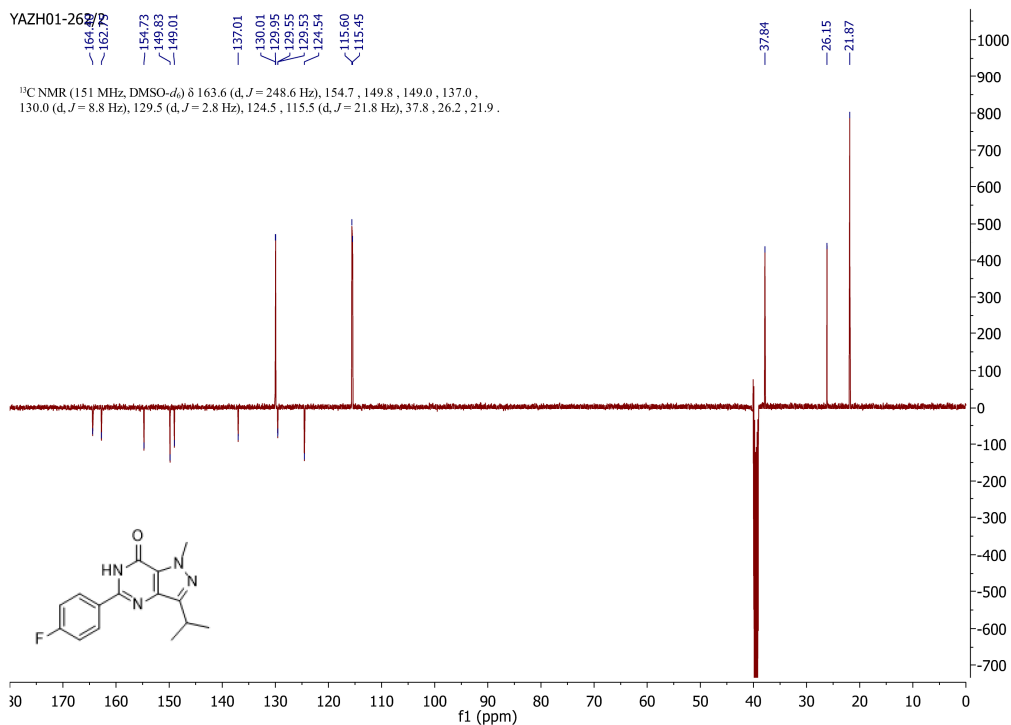

Figure S24. <sup>13</sup>C NMR spectrum of compound **11**.

Acquired by : Admin  
 Date Acquired : 13/9/2018 4:48:05 PM  
 Sample Name : YAZH01-258  
 Sample ID :  
 Tray# : 1  
 Vial# : 28  
 Injection Volume : 1  
 Data File : C:\LabSolutions\Data\2018\2018-wk37\YAZH01-258.lcd  
 Background File : blanco 13092018.lcd  
 Method File : Method SCAN ACID standard MW100.lcm  
 Report Format : DefaultL.CMS.lcr  
 Tuning File : C:\LabSolutions\Tuning\Tuning-ESI-pos-neg01072015a.lct  
 Processed by : Admin  
 Modified Date : 13/9/2018 5:22:57 PM

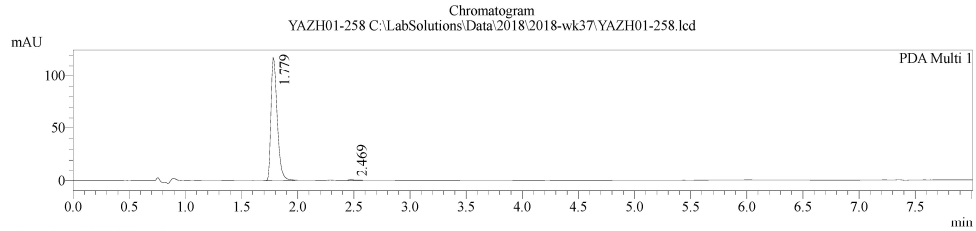

#1 PDA Multi 1 / 254nm 4nm

| Peak# | Name | Ret. Time | Area   | Area % |
|-------|------|-----------|--------|--------|
| 1     |      | 1.779     | 453050 | 99.404 |
| 2     |      | 2.469     | 2715   | 0.596  |

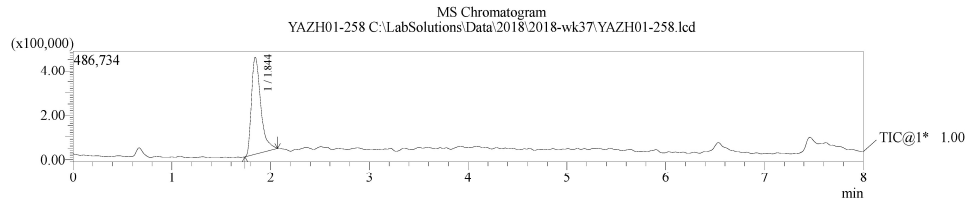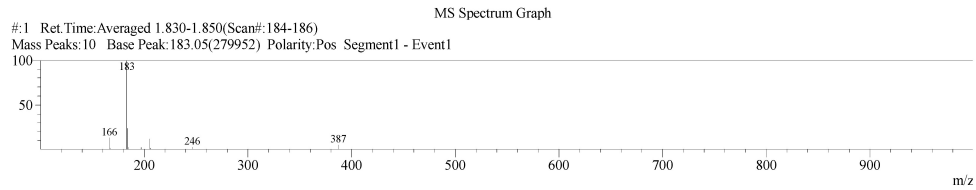

MS Spectrum Table

#1 Ret Time:  
BG Mode:Calc 1.740<->2.070(175<->208)  
Mass Peaks:10 Base Peak:183.05(279952) Polarity:Pos Segment1 - Event1

| # | m/z    | Abs.Inten. | Rel.Inten. | Charge | Polarity | Monoisotopic | #  | m/z    | Abs.Inten. | Rel.Inten. | Charge | Polarity | Monoisotopic |
|---|--------|------------|------------|--------|----------|--------------|----|--------|------------|------------|--------|----------|--------------|
| 1 | 166.10 | 35487      | 12.68      |        |          |              | 6  | 197.00 | 5190       | 1.85       |        |          |              |
| 2 | 167.00 | 3201       | 1.14       |        |          |              | 7  | 205.00 | 31743      | 11.34      |        |          |              |
| 3 | 183.05 | 279952     | 100.00     |        |          |              | 8  | 206.00 | 3173       | 1.13       |        |          |              |
| 4 | 184.05 | 65044      | 23.23      |        |          |              | 9  | 246.10 | 6568       | 2.35       |        |          |              |
| 5 | 185.05 | 5591       | 2.00       |        |          |              | 10 | 387.15 | 13120      | 4.69       |        |          |              |

Figure S25. LCMS spectrum of compound 14.

YAZH01-258.1.fid

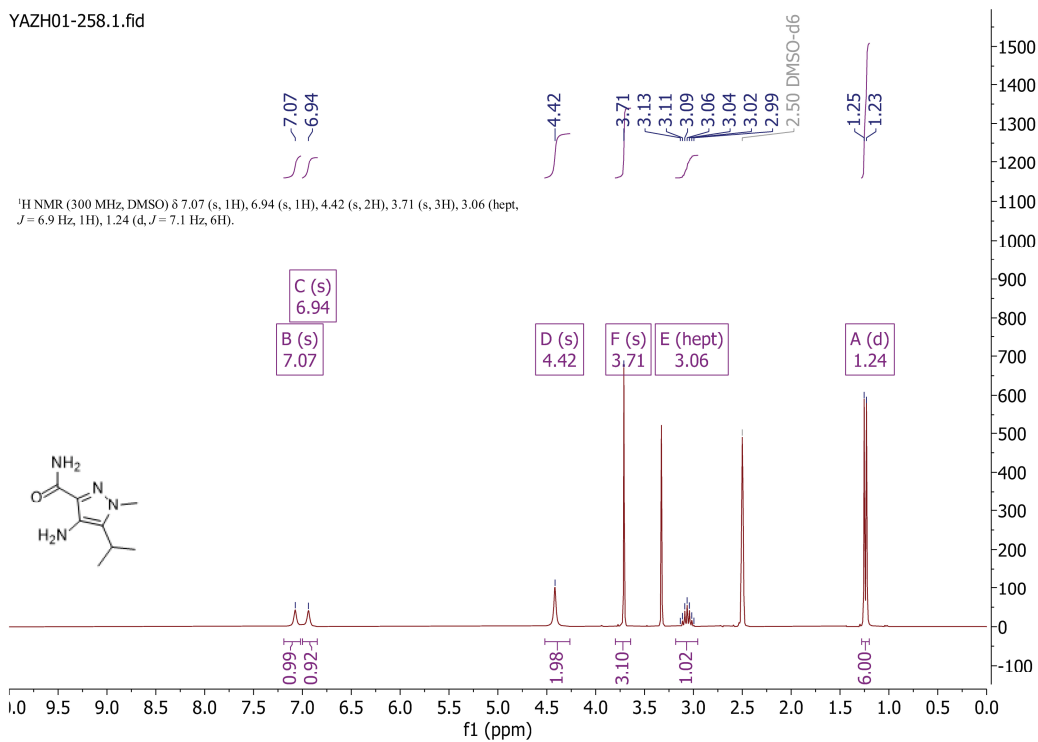

Figure S26. <sup>1</sup>H NMR spectrum of compound 14.

YAZH01-258/2

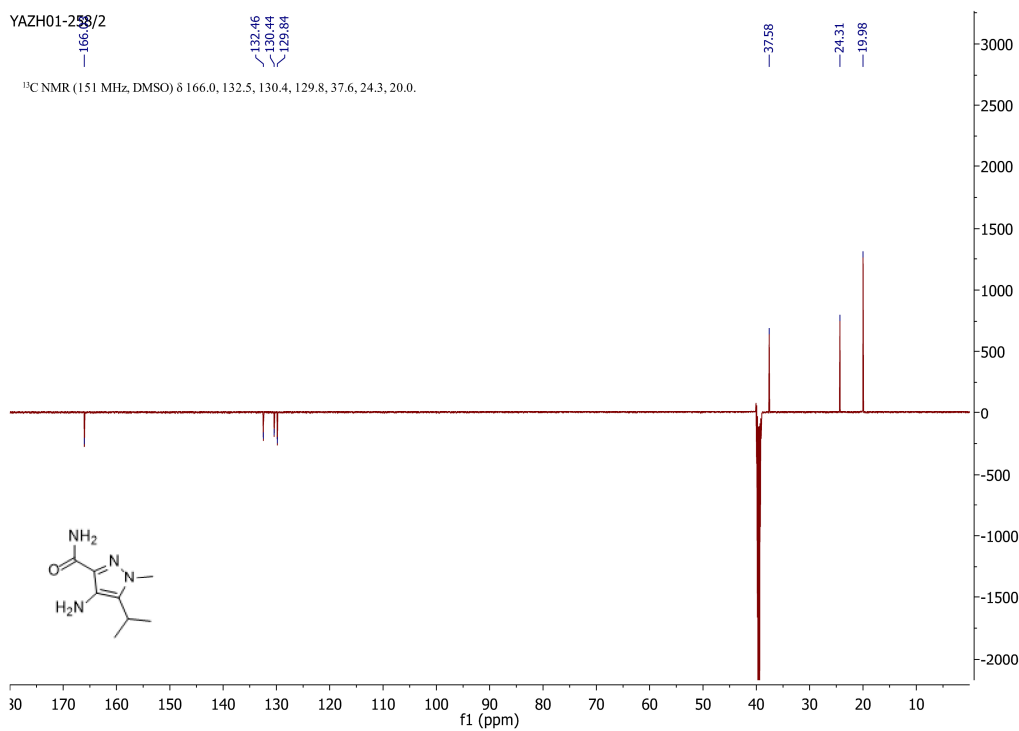

Figure S27. <sup>13</sup>C NMR spectrum of compound 14.

Acquired by : Admin  
 Date Acquired : 15/10/2018 10:05:15 AM  
 Sample Name : YAZH01-263  
 Sample ID :  
 Tray# : 1  
 Vial# : 7  
 Injection Volume : 3  
 Data File : C:\LabSolutions\Data\2018\2018-wk42\YAZH01-263.lcd  
 Background File : blanco\_15102018.lcd  
 Method File : Method SCAN ACID standard.lcm  
 Report Format : DefaultL.CMS.lcr  
 Tuning File : C:\LabSolutions\Tuning\Tuning-ESI-pos-neg01072015a.lct  
 Processed by : Admin  
 Modified Date : 15/10/2018 10:36:12 AM

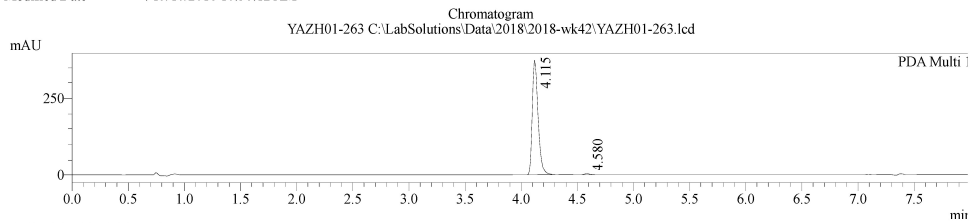

| Peak# | Name | Ret. Time | Area    | Area % |
|-------|------|-----------|---------|--------|
| 1     |      | 4.115     | 1342813 | 99.184 |
| 2     |      | 4.580     | 11050   | 0.816  |

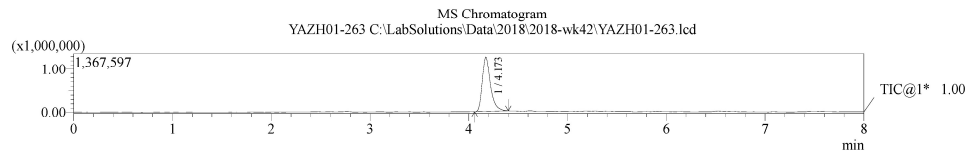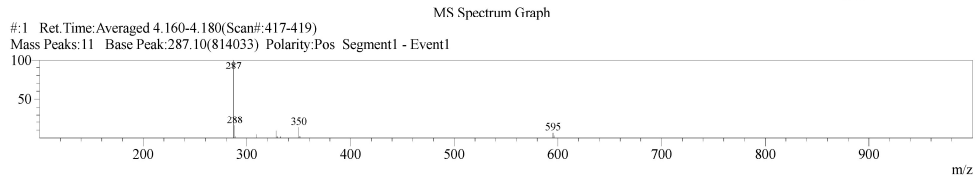

MS Spectrum Table  
#1 Ret Time: BG Mode:Calc 4.060-->4.400(407-->441)  
Mass Peaks:11 Base Peak:287.10(814033) Polarity:Pos Segment1 - Event1

| # | m/z    | Abs.Inten. | Rel.Inten. | Charge | Polarity | Monoisotopic | #  | m/z    | Abs.Inten. | Rel.Inten. | Charge | Polarity | Monoisotopic |
|---|--------|------------|------------|--------|----------|--------------|----|--------|------------|------------|--------|----------|--------------|
| 1 | 287.10 | 814033     | 100.00     |        |          |              | 7  | 332.15 | 13825      | 1.70       |        |          |              |
| 2 | 288.15 | 127144     | 15.62      |        |          |              | 8  | 350.10 | 106657     | 13.10      |        |          |              |
| 3 | 289.10 | 14865      | 1.83       |        |          |              | 9  | 351.10 | 17400      | 2.14       |        |          |              |
| 4 | 309.10 | 35012      | 4.30       |        |          |              | 10 | 595.25 | 50713      | 6.23       |        |          |              |
| 5 | 328.10 | 73982      | 9.09       |        |          |              | 11 | 596.25 | 23883      | 2.93       |        |          |              |
| 6 | 329.15 | 14796      | 1.82       |        |          |              |    |        |            |            |        |          |              |

Figure S28. LCMS spectrum of compound 15.

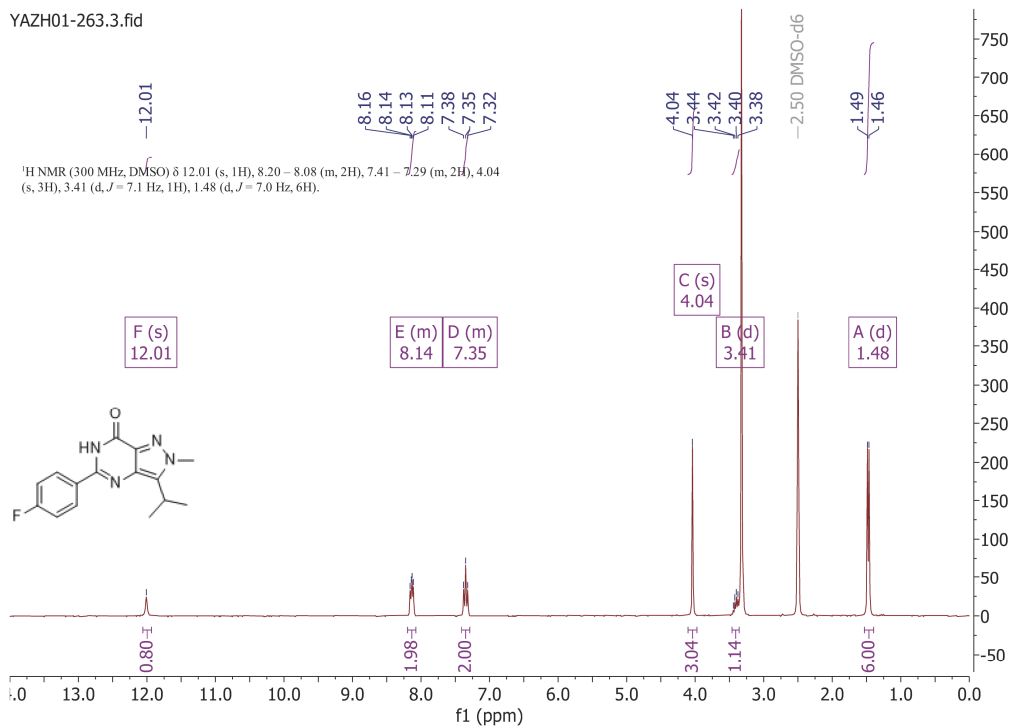

Figure S29. <sup>1</sup>H NMR spectrum of compound 15.

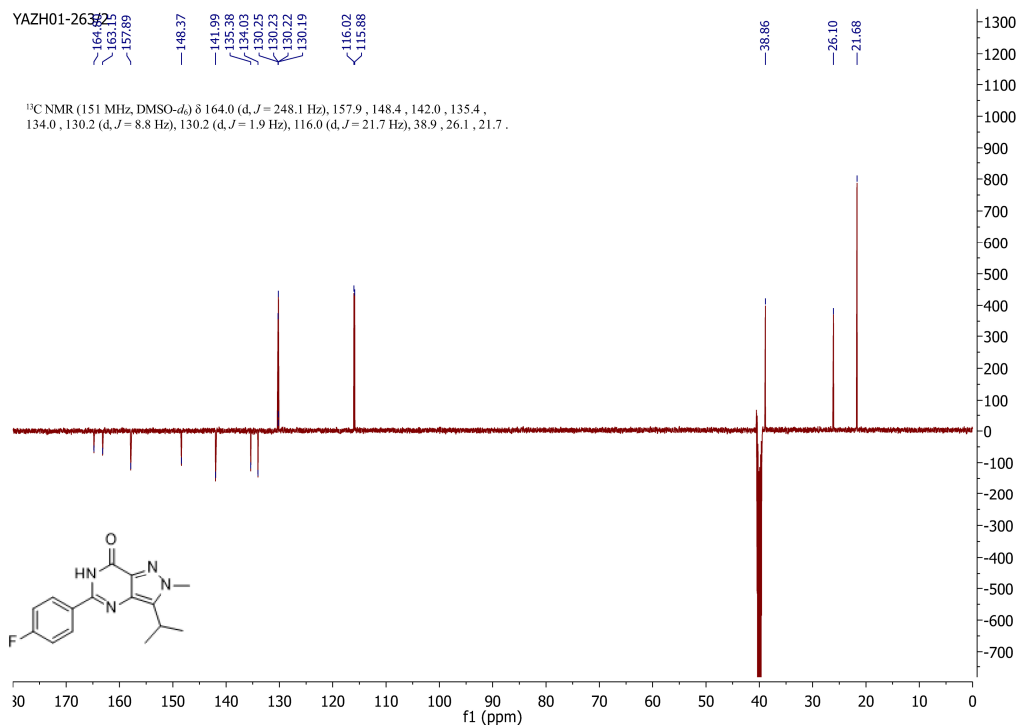

Figure S30. <sup>13</sup>C NMR spectrum of compound 15.

Acquired by : Admin  
 Date Acquired : 17/4/2019 8:59:50 AM  
 Sample Name : LABI-044  
 Sample ID :  
 Tray# : 1  
 Vial# : 1  
 Injection Volume : 5  
 Data File : C:\LabSolutions\Data\2019\2019-wk16\LABI-044.lcd  
 Background File : blanco 17042019.lcd  
 Method File : Method SCAN ACID standard.lcm  
 Report Format : DefaultLCMS.lcr  
 Tuning File : C:\LabSolutions\Tuning\Tuning-ESI-pos-neg01072015a.lct  
 Processed by : Admin  
 Modified Date : 19/6/2019 3:30:24 PM

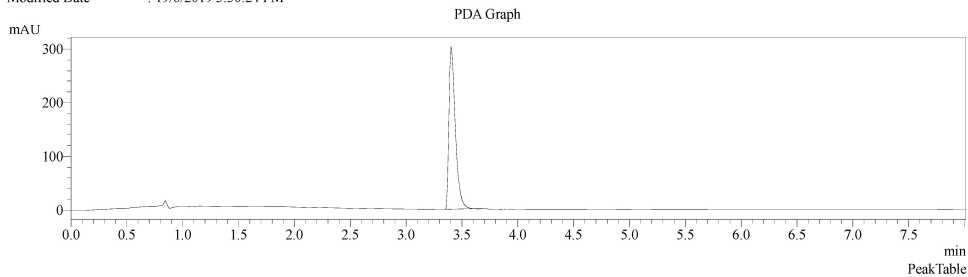

PDA Ch1 254nm 4nm

| Peak# | Name | Ret. Time | Area    | Area %  |
|-------|------|-----------|---------|---------|
| 1     |      | 3.400     | 1205913 | 100.000 |

Peak Table

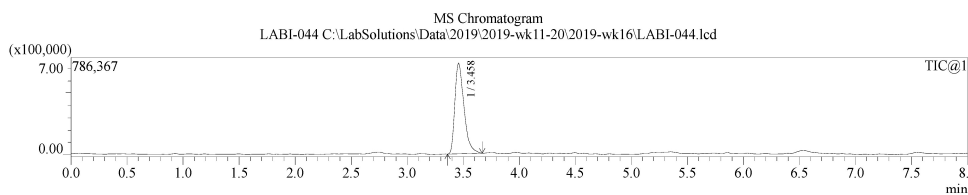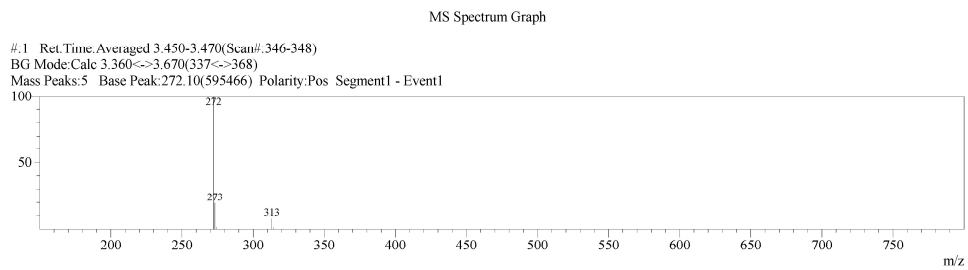

MS Spectrum Table

#1 Ret.Time:  
 BG Mode: Calc 3.360<->3.670(337<->368)  
 Mass Peaks: 5 Base Peak: 272.10(595466) Polarity: Pos Segment1 - Event1

| # | m/z    | Abs.Inten. | Rel.Inten. | Charge | Polarity | Monoisotopic | # | m/z    | Abs.Inten. | Rel.Inten. | Charge | Polarity | Monoisotopic |
|---|--------|------------|------------|--------|----------|--------------|---|--------|------------|------------|--------|----------|--------------|
| 1 | 272.10 | 595466     | 100.00     |        |          |              | 4 | 313.10 | 47323      | 7.95       |        |          |              |
| 2 | 273.10 | 116312     | 19.53      |        |          |              | 5 | 314.10 | 8585       | 1.44       |        |          |              |
| 3 | 274.10 | 10013      | 1.68       |        |          |              |   |        |            |            |        |          |              |

Figure S31. LCMS spectrum of compound 17.

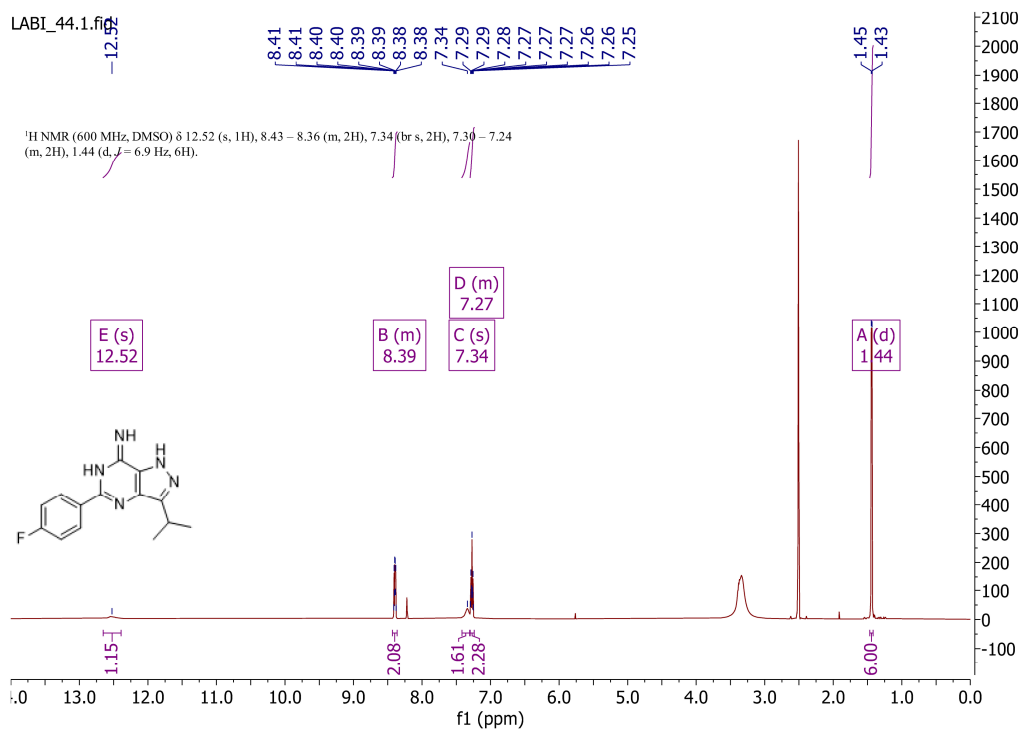

Figure S32. <sup>1</sup>H NMR spectrum of compound 17.

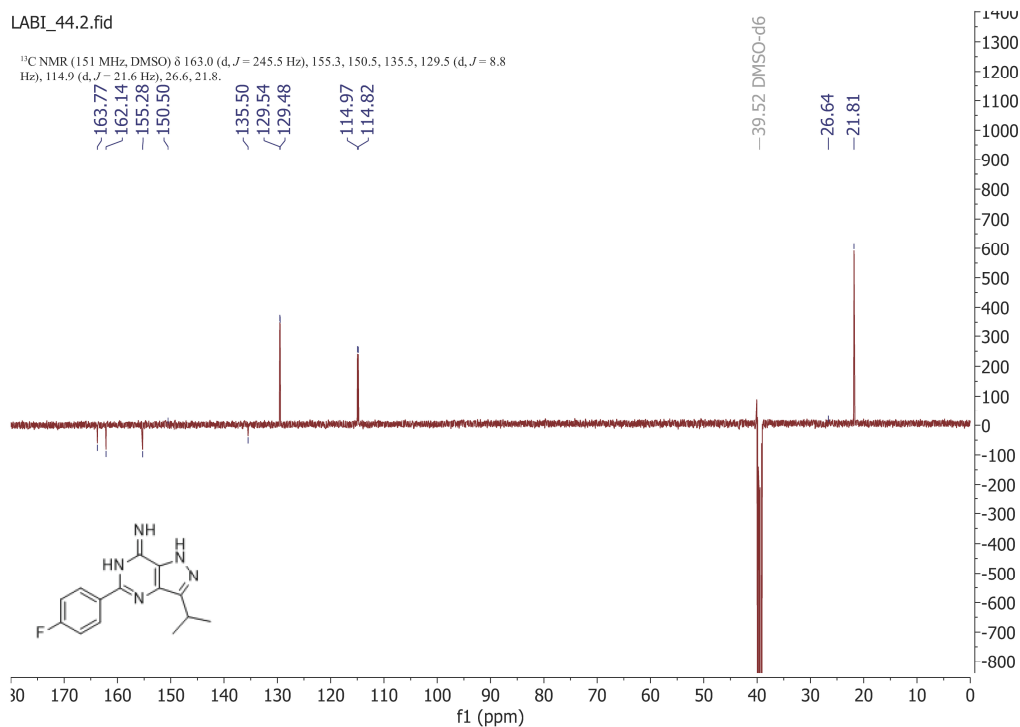

Figure S33. <sup>13</sup>C NMR spectrum of compound 17.



Acquired by : Admin  
 Date Acquired : 7/3/2019 4:10:39 PM  
 Sample Name : YAZH\_23-1  
 Sample ID :  
 Tray# : 1  
 Vial# : 17  
 Injection Volume : 4  
 Data File : C:\LabSolutions\Data\2019\2019-wk09\YAZH\_23-1.lcd  
 Background File : blanco 07032019.lcd  
 Method File : Method SCAN ACID standard.lcm  
 Report Format : DefaultL.CMS.lcr  
 Tuning File : C:\LabSolutions\Tuning\Tuning-ESI-pos-neg01072015a.lct  
 Processed by : Admin  
 Modified Date : 7/3/2019 4:29:18 PM

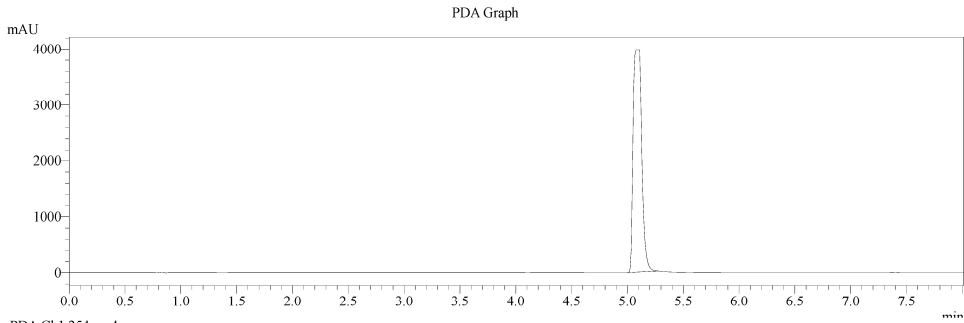

PDA Ch1 254nm 4nm

| Peak# | Name | Ret. Time | Area     | Area %  |
|-------|------|-----------|----------|---------|
| 1     |      | 5.077     | 21334096 | 100.000 |

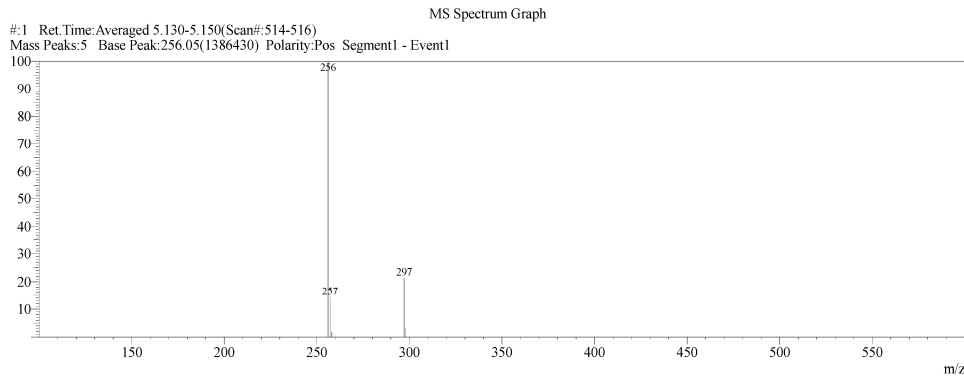

MS Spectrum Table

#1 Ret.Time:  
 BG Mode:Calc 5.020<->5.570(503<->558)  
 Mass Peaks:5 Base Peak:256.05(1386430) Polarity:Pos Segment1 - Event1

| # | m/z    | Abs.Inten. | Rel.Inten. | Charge | Polarity | Monoisotopic | # | m/z    | Abs.Inten. | Rel.Inten. | Charge | Polarity | Monoisotopic |
|---|--------|------------|------------|--------|----------|--------------|---|--------|------------|------------|--------|----------|--------------|
| 1 | 256.05 | 1386430    | 100.00     |        |          |              | 4 | 297.10 | 296569     | 21.39      |        |          |              |
| 2 | 257.10 | 198226     | 14.30      |        |          |              | 5 | 298.10 | 45252      | 3.26       |        |          |              |
| 3 | 258.10 | 25936      | 1.87       |        |          |              |   |        |            |            |        |          |              |

Figure S34. LCMS spectrum of compound **18a**.

YAZH\_23-1/1

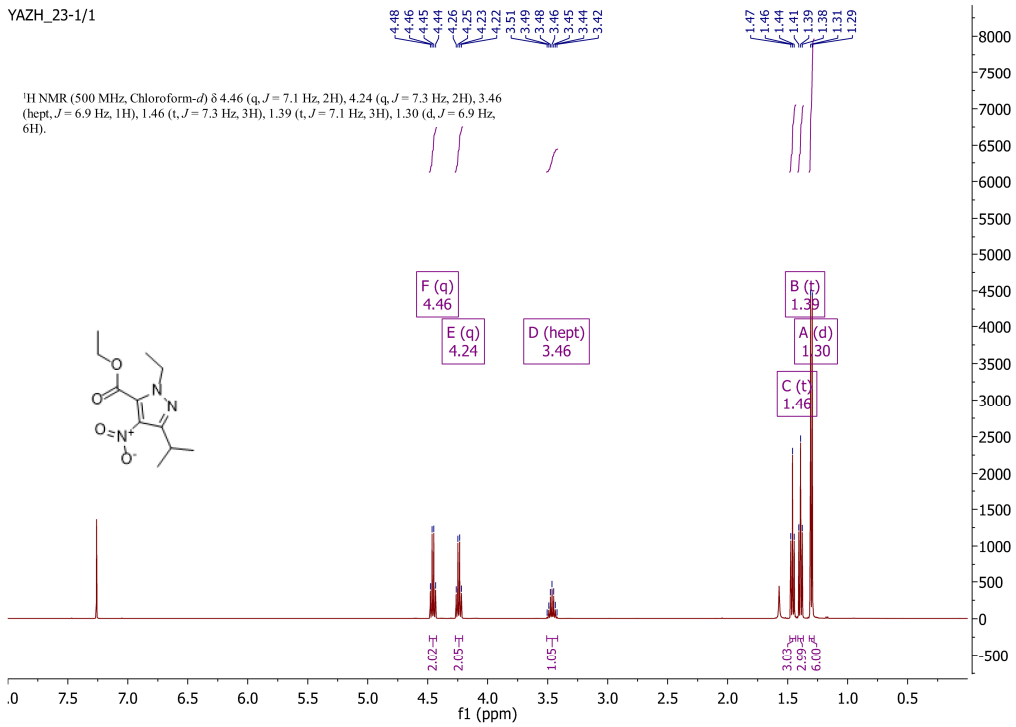

Figure S35. <sup>1</sup>H NMR spectrum of compound **18a**.

YAZH\_23-1/3

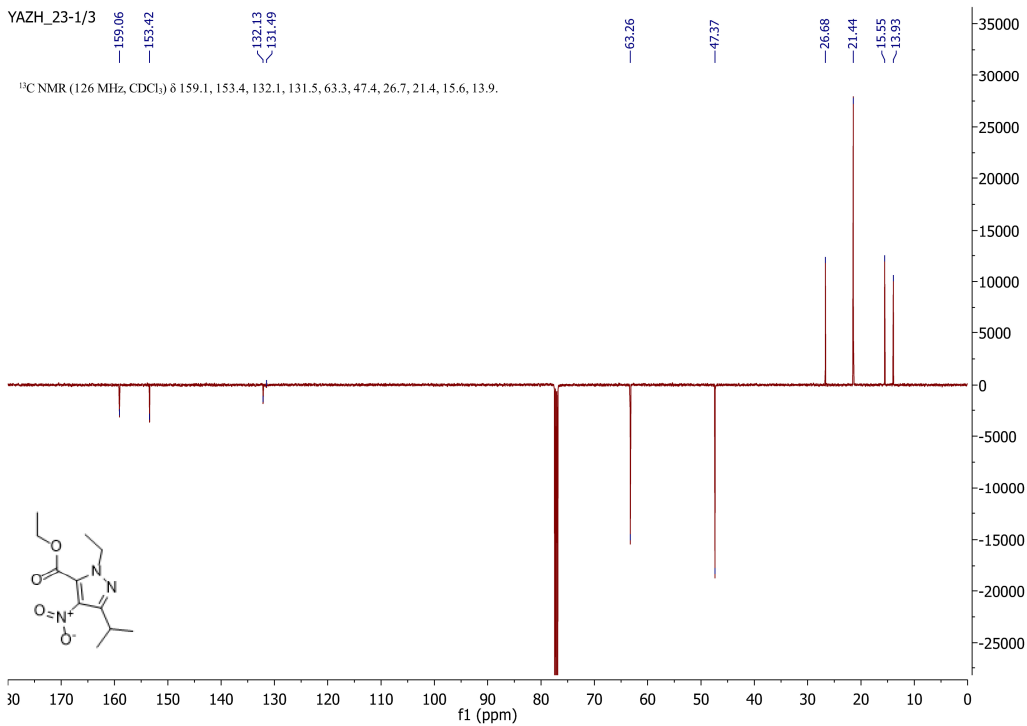

Figure S36. <sup>13</sup>C NMR spectrum of compound **18a**.

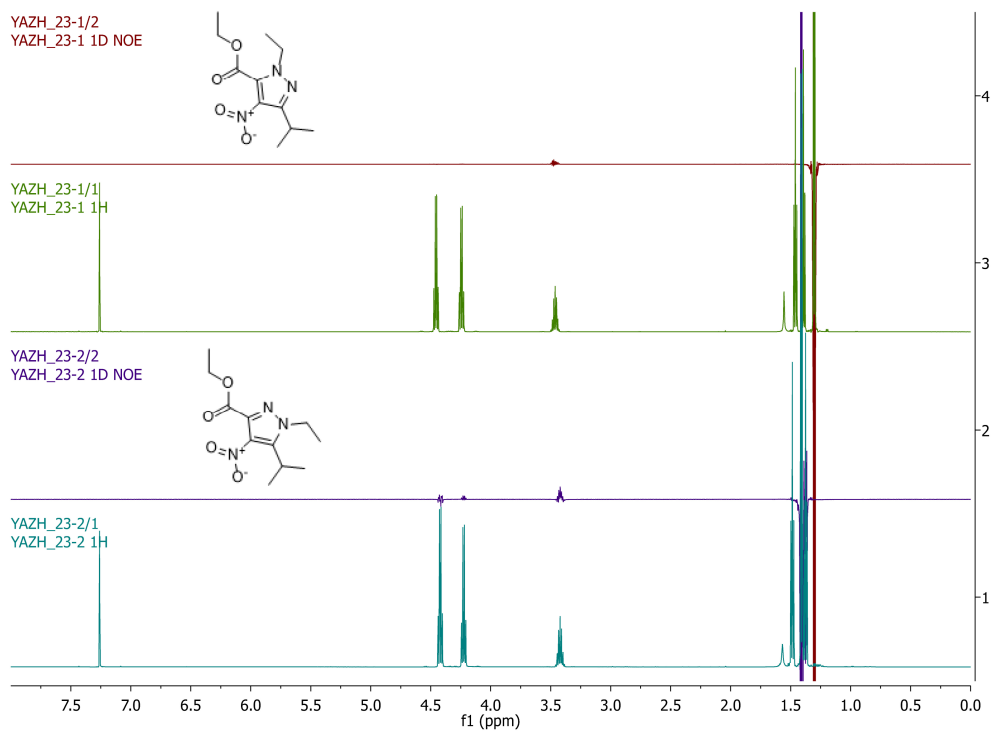

Figure S37. 1D NOESY spectrum of compound **18a** and its regioisomer.

Acquired by : Admin  
 Date Acquired : 18/6/2019 9:45:35 AM  
 Sample Name : MOIB\_23\_1  
 Sample ID :  
 Tray# : 1  
 Vial# : 3  
 Injection Volume : 1  
 Data File : C:\LabSolutions\Data\2019\2019-wk25\MOIB\_23\_1.lcd  
 Background File : blanco 18062019.lcd  
 Method File : Method SCAN ACID standard.lcm  
 Report Format : DefaultL.CMS.lcr  
 Tuning File : C:\LabSolutions\Tuning\Tuning-ESI-pos-neg01072015a.lct  
 Processed by : Admin  
 Modified Date : 18/6/2019 10:59:57 AM

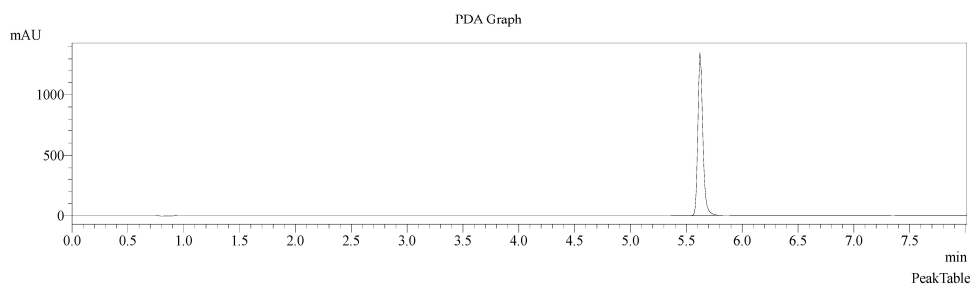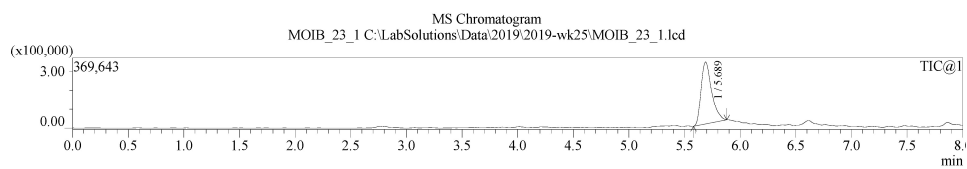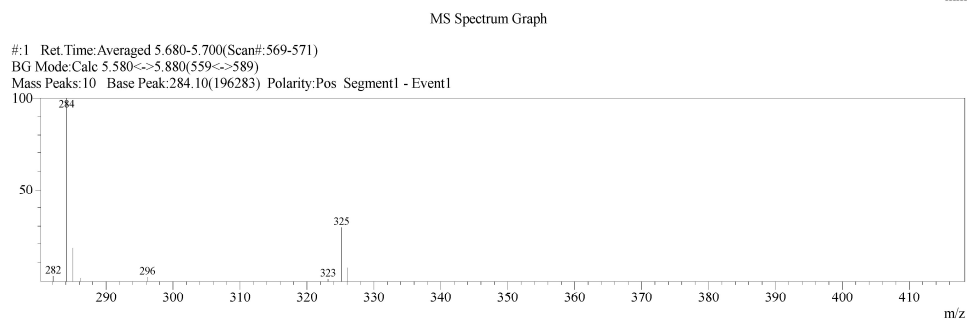

MS Spectrum Table

#1 Ret. Time:  
 BG Mode: Calc 5.580-<->5.880(559-<->589)  
 Mass Peaks: 10 Base Peak: 284.10(196283) Polarity: Pos Segment1 - Event1

| # | m/z    | Abs.Inten. | Rel.Inten. | Charge | Polarity | Monoisotopic | #  | m/z    | Abs.Inten. | Rel.Inten. | Charge | Polarity | Monoisotopic |
|---|--------|------------|------------|--------|----------|--------------|----|--------|------------|------------|--------|----------|--------------|
| 1 | 280.25 | 3989       | 2.03       |        |          |              | 6  | 296.15 | 4447       | 2.27       |        |          |              |
| 2 | 282.10 | 5645       | 2.88       |        |          |              | 7  | 323.15 | 2573       | 1.31       |        |          |              |
| 3 | 284.10 | 196283     | 100.00     |        |          |              | 8  | 325.15 | 57615      | 29.35      |        |          |              |
| 4 | 285.05 | 35064      | 17.86      |        |          |              | 9  | 326.10 | 14474      | 7.37       |        |          |              |
| 5 | 286.20 | 3600       | 1.83       |        |          |              | 10 | 418.30 | 2919       | 1.49       |        |          |              |

Figure S38. LCMS spectrum of compound **18b**.

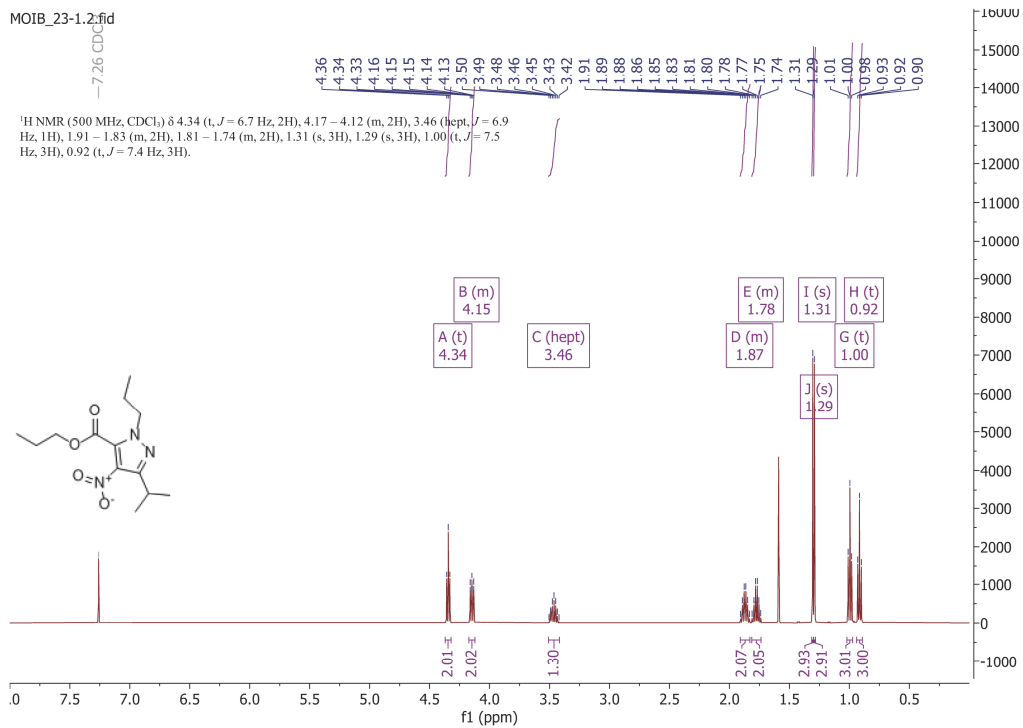

Figure S39. <sup>1</sup>H NMR spectrum of compound **18b**.

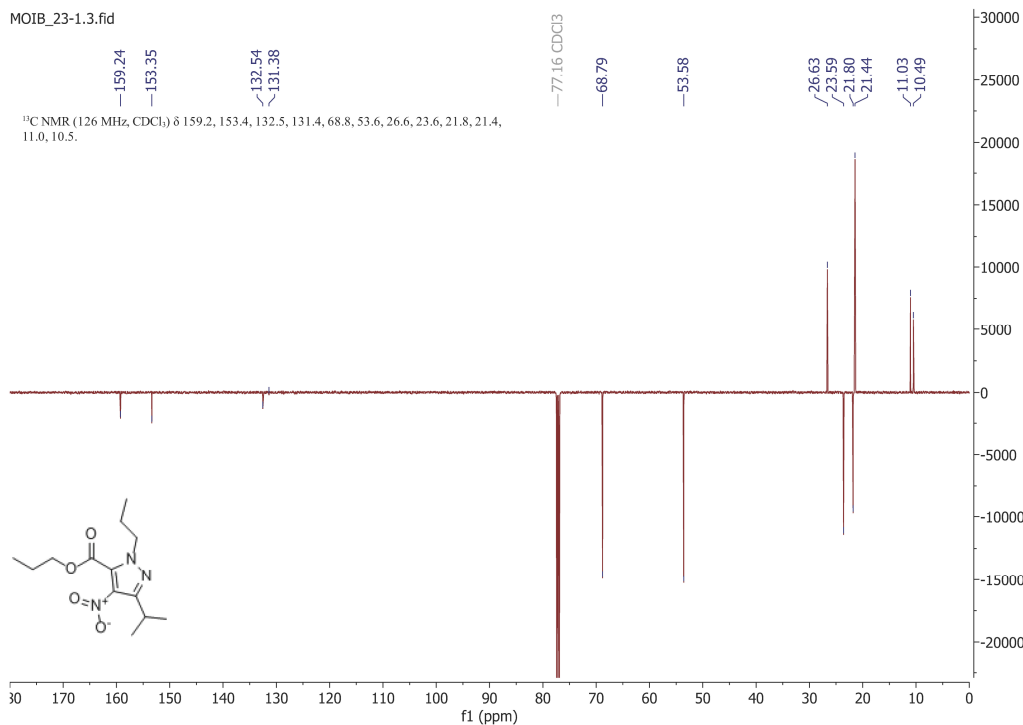

Figure S40. <sup>13</sup>C NMR spectrum of compound **18b**.

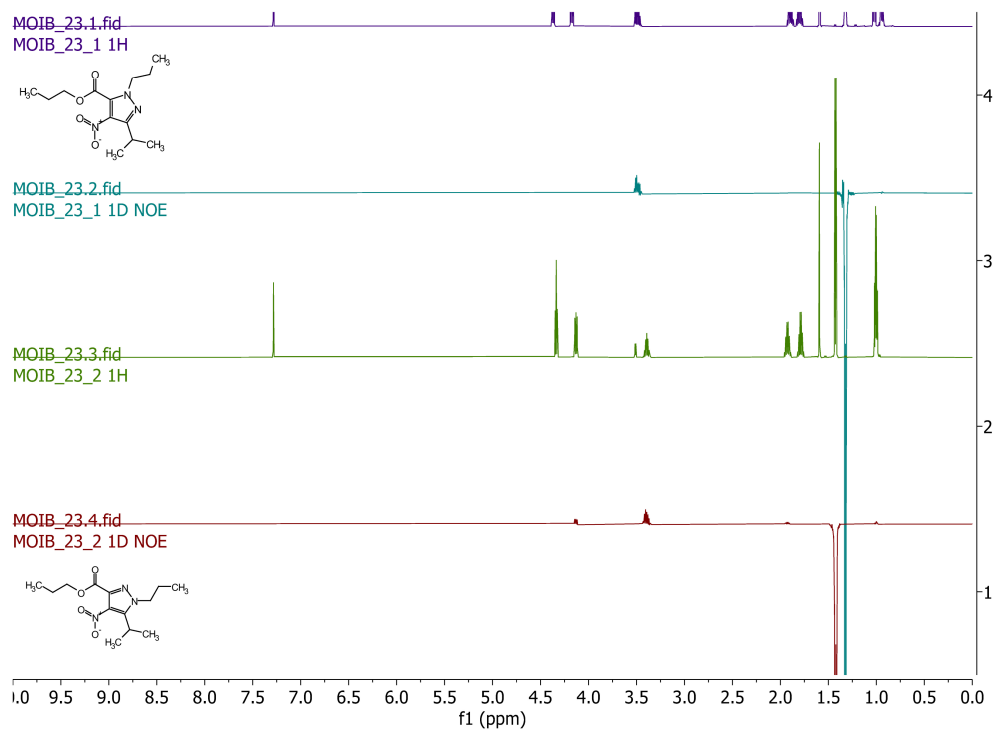

Figure S41. 1D NOESY spectrum of compound **18b** and its regioisomer.

Acquired by : Admin  
 Date Acquired : 19/6/2019 10:34:53 AM  
 Sample Name : YAZH\_43-1  
 Sample ID :  
 Tray# : 1  
 Vial# : 8  
 Injection Volume : 1  
 Data File : C:\LabSolutions\Data\2019\2019-wk25\YAZH\_43-1.lcd  
 Background File : blanco 19062019.lcd  
 Method File : Method SCAN ACID standard.lcm  
 Report Format : DefaultL.CMS.lcr  
 Tuning File : C:\LabSolutions\Tuning\Tuning-ESI-pos-neg01072015a.lct  
 Processed by : Admin  
 Modified Date : 19/6/2019 4:22:46 PM

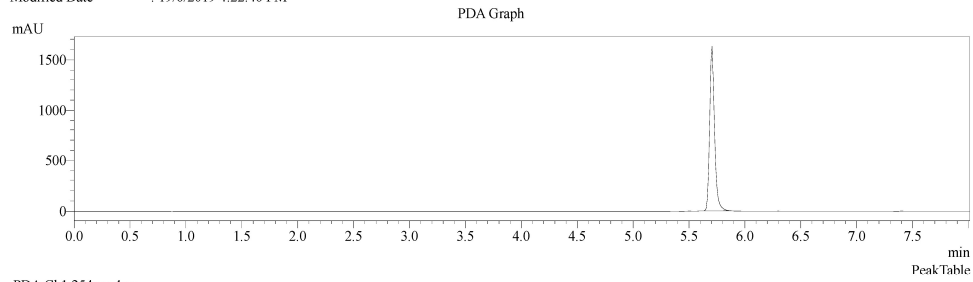

PDA Ch1 254nm 4nm

| Peak# | Name | Ret. Time | Area    | Area %  |
|-------|------|-----------|---------|---------|
| 1     |      | 5.699     | 4966643 | 100.000 |

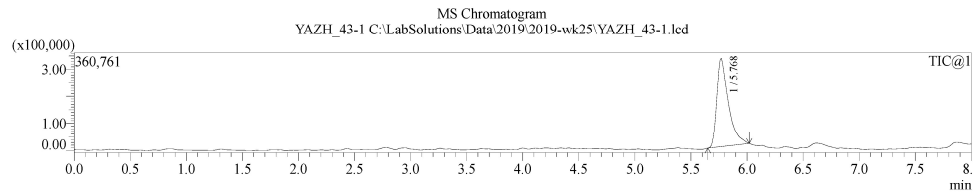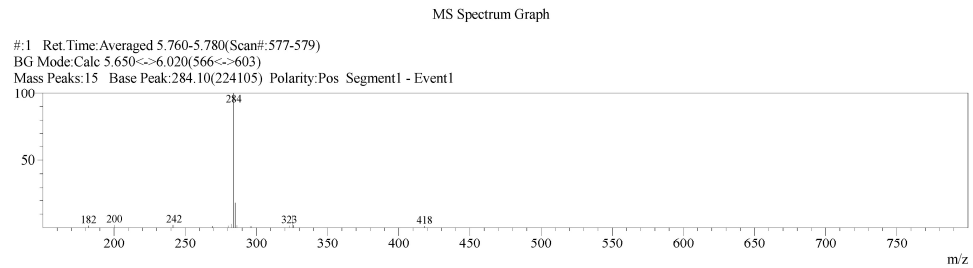

MS Spectrum Table

#1 Ret.Time:  
 BG Mode: Calc 5.650-<->6.020(566-<->603)  
 Mass Peaks: 15 Base Peak: 284.10(224105) Polarity: Pos Segment1 - Event1

| # | m/z    | Abs.Inten. | Rel.Inten. | Charge | Polarity | Monoisotopic | #  | m/z    | Abs.Inten. | Rel.Inten. | Charge | Polarity | Monoisotopic |
|---|--------|------------|------------|--------|----------|--------------|----|--------|------------|------------|--------|----------|--------------|
| 1 | 181.95 | 3035       | 1.35       |        |          |              | 9  | 285.10 | 41155      | 18.36      |        |          |              |
| 2 | 200.05 | 4316       | 1.93       |        |          |              | 10 | 286.35 | 3826       | 1.71       |        |          |              |
| 3 | 240.90 | 4325       | 1.93       |        |          |              | 11 | 296.20 | 2329       | 1.04       |        |          |              |
| 4 | 242.05 | 4400       | 1.96       |        |          |              | 12 | 323.05 | 3143       | 1.40       |        |          |              |
| 5 | 269.25 | 2361       | 1.05       |        |          |              | 13 | 325.10 | 21110      | 9.42       |        |          |              |
| 6 | 280.15 | 3036       | 1.35       |        |          |              | 14 | 326.15 | 3795       | 1.69       |        |          |              |
| 7 | 282.30 | 5961       | 2.66       |        |          |              | 15 | 418.00 | 2245       | 1.00       |        |          |              |
| 8 | 284.10 | 224105     | 100.00     |        |          |              |    |        |            |            |        |          |              |

Figure S42. LCMS spectrum of compound **18c**.

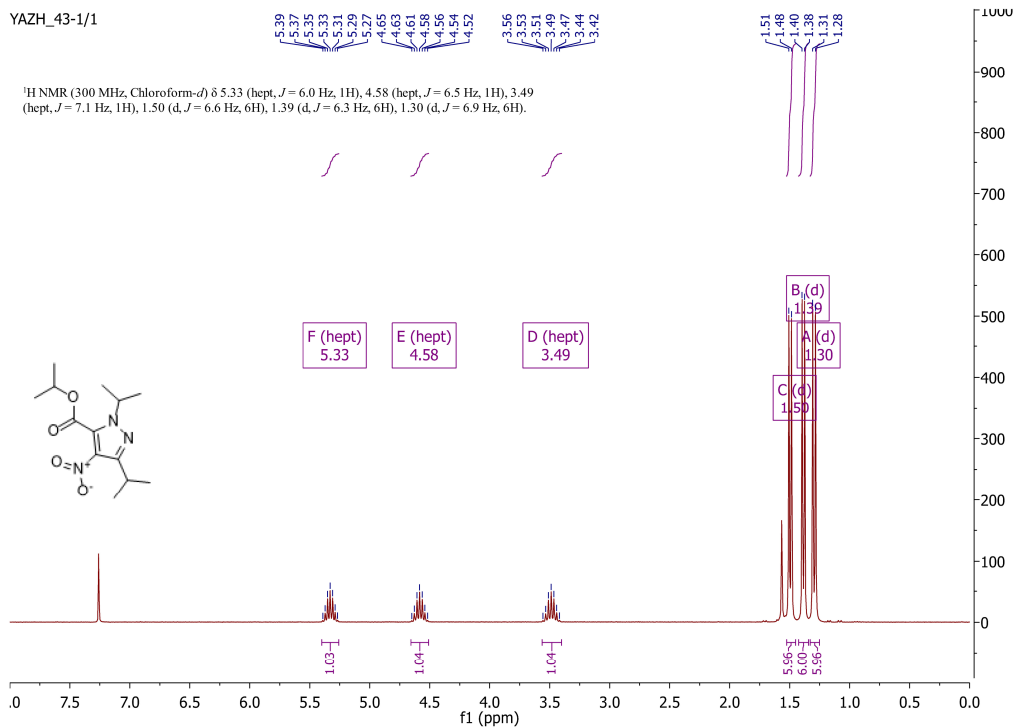

Figure S43. <sup>1</sup>H NMR spectrum of compound **18c**.

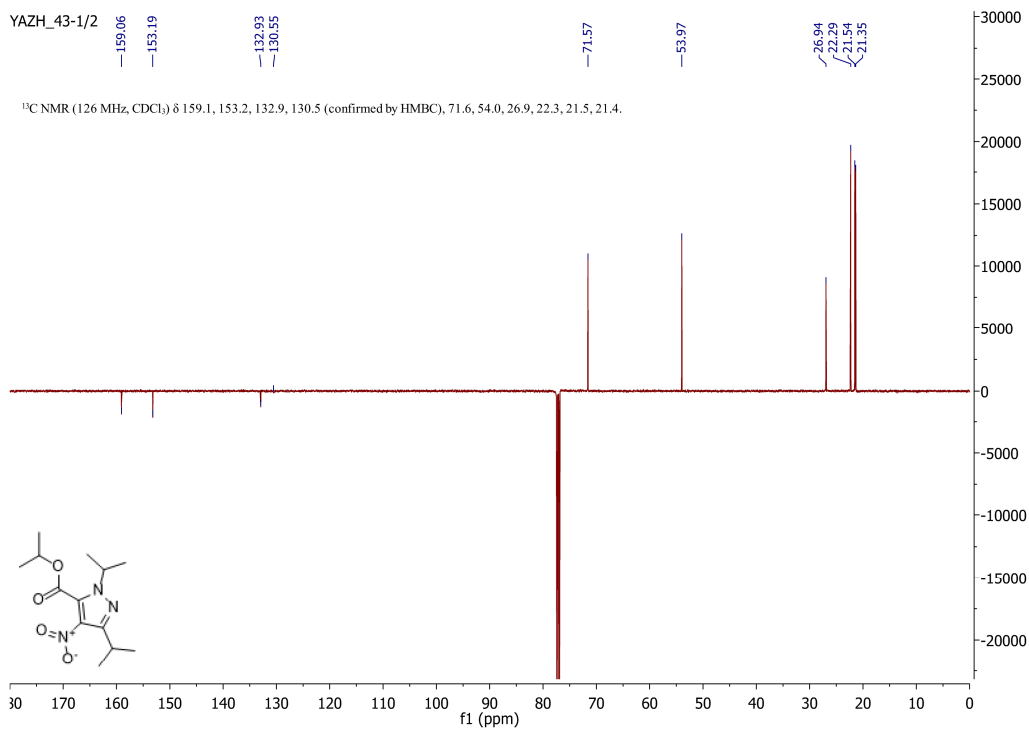

Figure S44. <sup>13</sup>C NMR spectrum of compound **18c**.



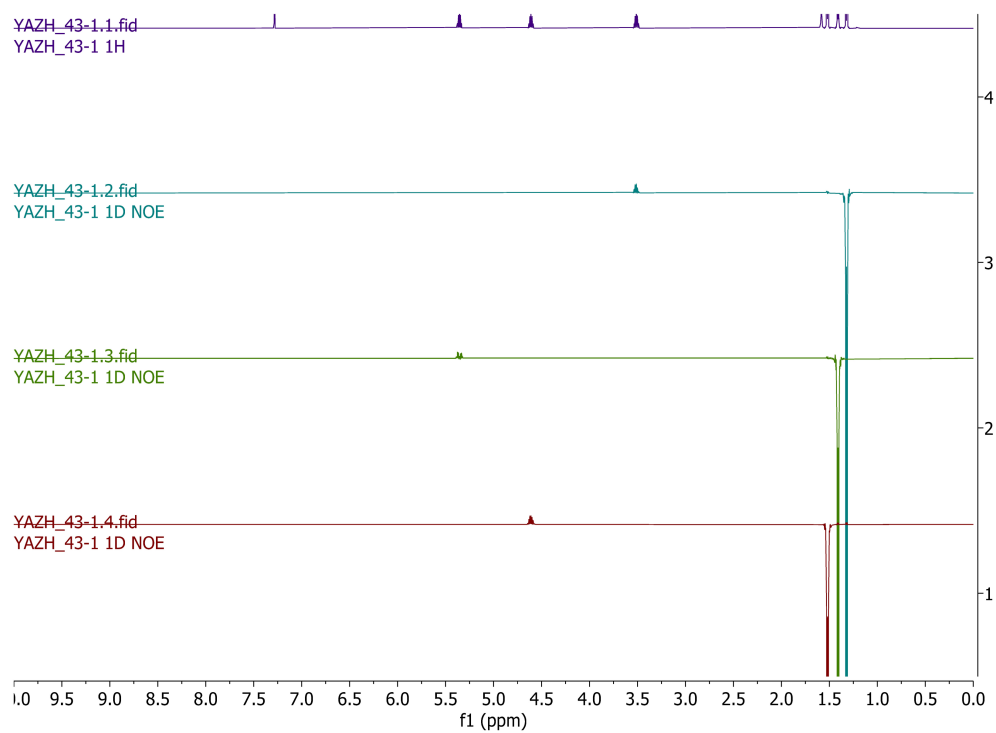

Figure S45. 1D NOESY spectrum of compound **18c**.

Acquired by : Admin  
 Date Acquired : 21/3/2019 12:05:23 PM  
 Sample Name : MOIB\_1\_pure\_biggest\_peak  
 Sample ID :  
 Tray# : 1  
 Vial# : 9  
 Injection Volume : 1  
 Data File : C:\LabSolutions\Data\2019\2019-wk11\MOIB\_1\_pure\_biggest\_peak.lcd  
 Background File : blanco 21032019.lcd  
 Method File : Method SCAN ACID standard.lcm  
 Report Format : DefaultL.CMS.lcr  
 Tuning File : C:\LabSolutions\Tuning\Tuning-ESI-pos-neg01072015a.lct  
 Processed by : Admin  
 Modified Date : 30/3/2021 4:44:59 PM

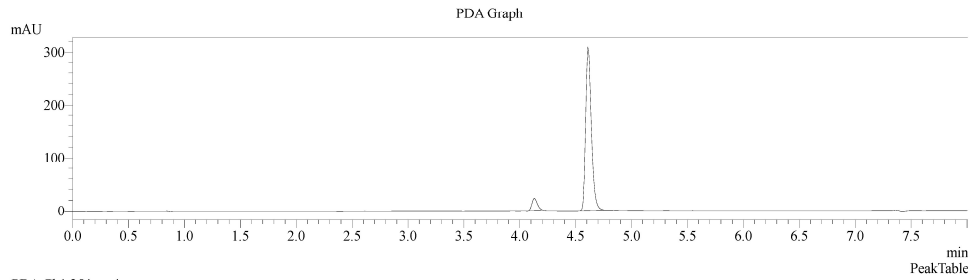

| Peak# | Name | Ret. Time | Area    | Area % |
|-------|------|-----------|---------|--------|
| 1     |      | 4.125     | 71087   | 6.087  |
| 2     |      | 4.606     | 1096754 | 93.913 |

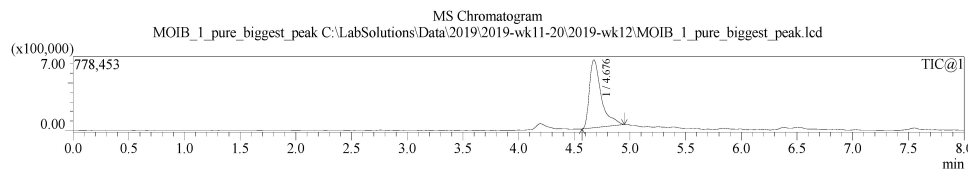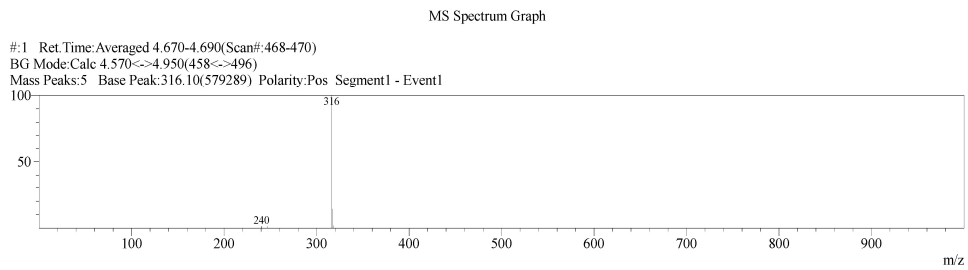

MS Spectrum Table

#1 Ret. Time:  
 BG Mode: Calc 4.570<->4.950 (458<->496)  
 Mass Peaks: 5 Base Peak: 316.10 (579289) Polarity: Pos Segment1 - Event1

| # | m/z    | Abs.Inten. | Rel.Inten. | Charge | Polarity | Monoisotopic | # | m/z    | Abs.Inten. | Rel.Inten. | Charge | Polarity | Monoisotopic |
|---|--------|------------|------------|--------|----------|--------------|---|--------|------------|------------|--------|----------|--------------|
| 1 | 240.15 | 7836       | 1.35       |        |          |              | 4 | 317.10 | 82577      | 14.25      |        |          |              |
| 2 | 247.05 | 8419       | 1.45       |        |          |              | 5 | 318.15 | 11594      | 2.00       |        |          |              |
| 3 | 316.10 | 579289     | 100.00     |        |          |              |   |        |            |            |        |          |              |

Figure S46. LCMS spectrum of compound **18d**.

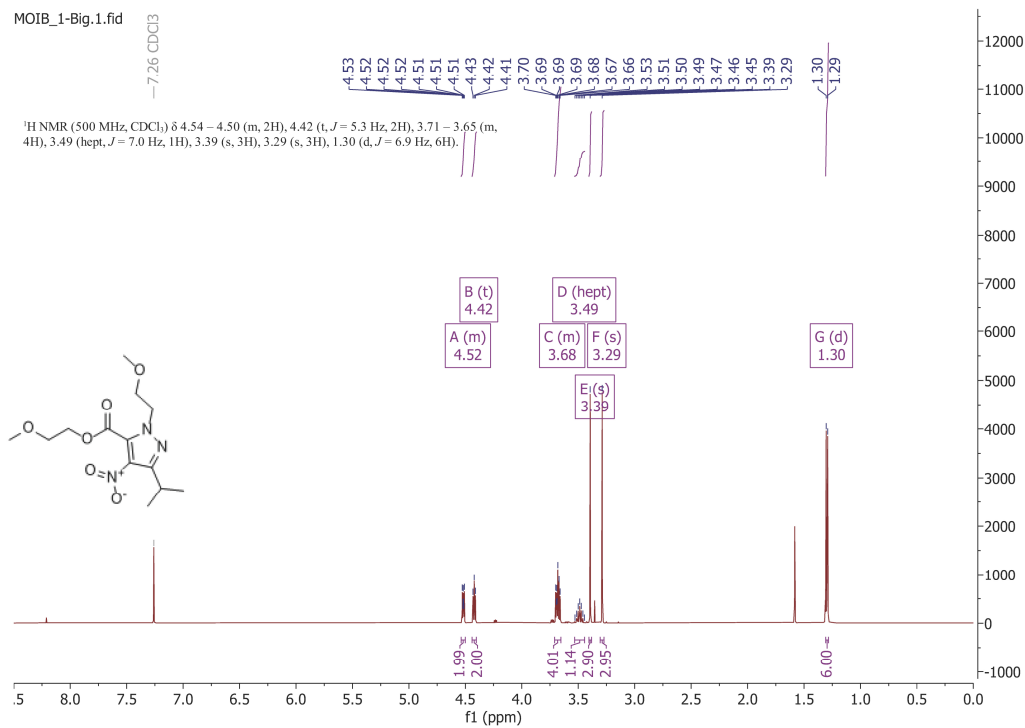

Figure S47. <sup>1</sup>H NMR spectrum of compound **18d**.

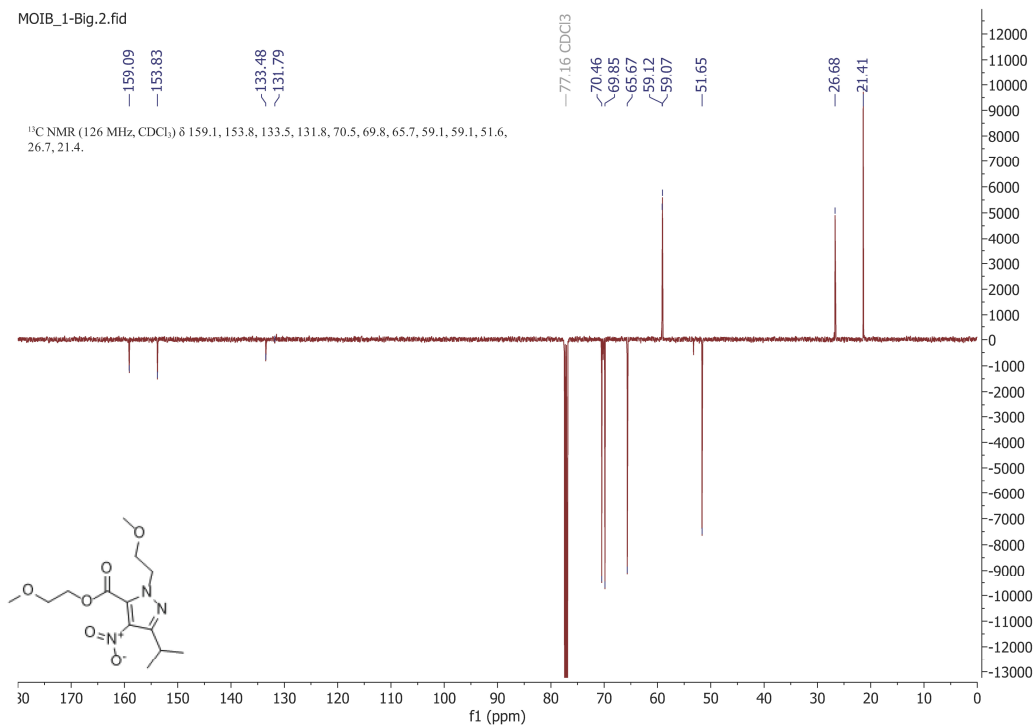

Figure S48. <sup>13</sup>C NMR spectrum of compound **18d**.

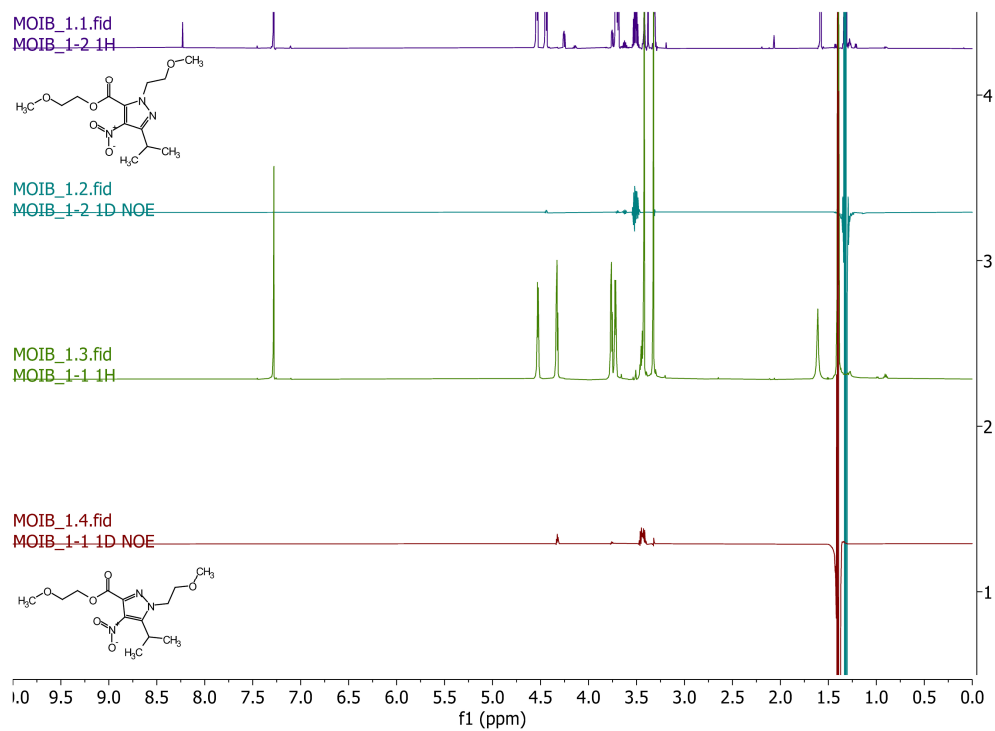

Figure S49. 1D NOESY spectrum of compound **18d** and its regioisomer.

Acquired by : Admin  
 Date Acquired : 26/3/2019 4:14:25 PM  
 Sample Name : MOIB\_2\_pure\_big  
 Sample ID :  
 Tray# : 1  
 Vial# : 32  
 Injection Volume : 1  
 Data File : C:\LabSolutions\Data\2019\2019-wk13\MOIB\_2\_pure\_big.lcd  
 Background File : blanco 26032019.lcd  
 Method File : Method SCAN ACID standard.lcm  
 Report Format : DefaultL.CMS.lcr  
 Tuning File : C:\LabSolutions\Tuning\Tuning-ESI-pos-neg01072015a.lct  
 Processed by : Admin  
 Modified Date : 6/4/2021 10:55:03 AM

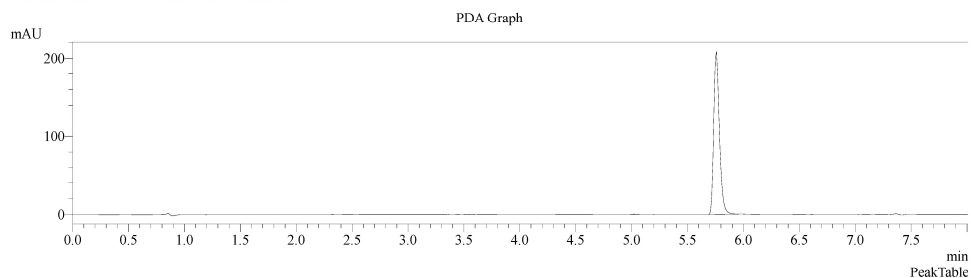

| Peak# | Name | Ret. Time | Area   | Area % |
|-------|------|-----------|--------|--------|
| 1     |      | 4.022     | 714    | 0.098  |
| 2     |      | 5.014     | 1235   | 0.169  |
| 3     |      | 5.752     | 728241 | 99.733 |

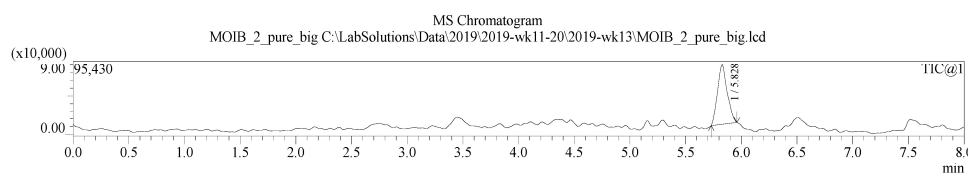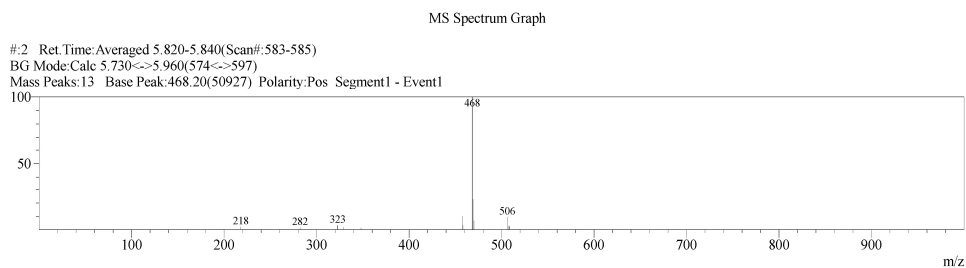

MS Spectrum Table

#2 Ret. Time:  
 BG Mode: Calc 5.730<->5.960(574<->597)  
 Mass Peaks: 13 Base Peak: 468.20(50927) Polarity: Pos Segment1 - Event1

| # | m/z    | Abs.Inten. | Rel.Inten. | Charge | Polarity | Monoisotopic | #  | m/z    | Abs.Inten. | Rel.Inten. | Charge | Polarity | Monoisotopic |
|---|--------|------------|------------|--------|----------|--------------|----|--------|------------|------------|--------|----------|--------------|
| 1 | 217.90 | 1105       | 2.17       |        |          |              | 8  | 468.20 | 50927      | 100.00     |        |          |              |
| 2 | 282.10 | 845        | 1.66       |        |          |              | 9  | 469.15 | 11685      | 22.94      |        |          |              |
| 3 | 322.75 | 1627       | 3.19       |        |          |              | 10 | 470.20 | 3443       | 6.76       |        |          |              |
| 4 | 329.10 | 873        | 1.71       |        |          |              | 11 | 506.25 | 4792       | 9.41       |        |          |              |
| 5 | 348.05 | 675        | 1.33       |        |          |              | 12 | 507.25 | 1404       | 2.76       |        |          |              |
| 6 | 457.40 | 5176       | 10.16      |        |          |              | 13 | 508.45 | 1305       | 2.56       |        |          |              |
| 7 | 458.25 | 1603       | 3.15       |        |          |              |    |        |            |            |        |          |              |

Figure S50. LCMS spectrum of compound **18e**.

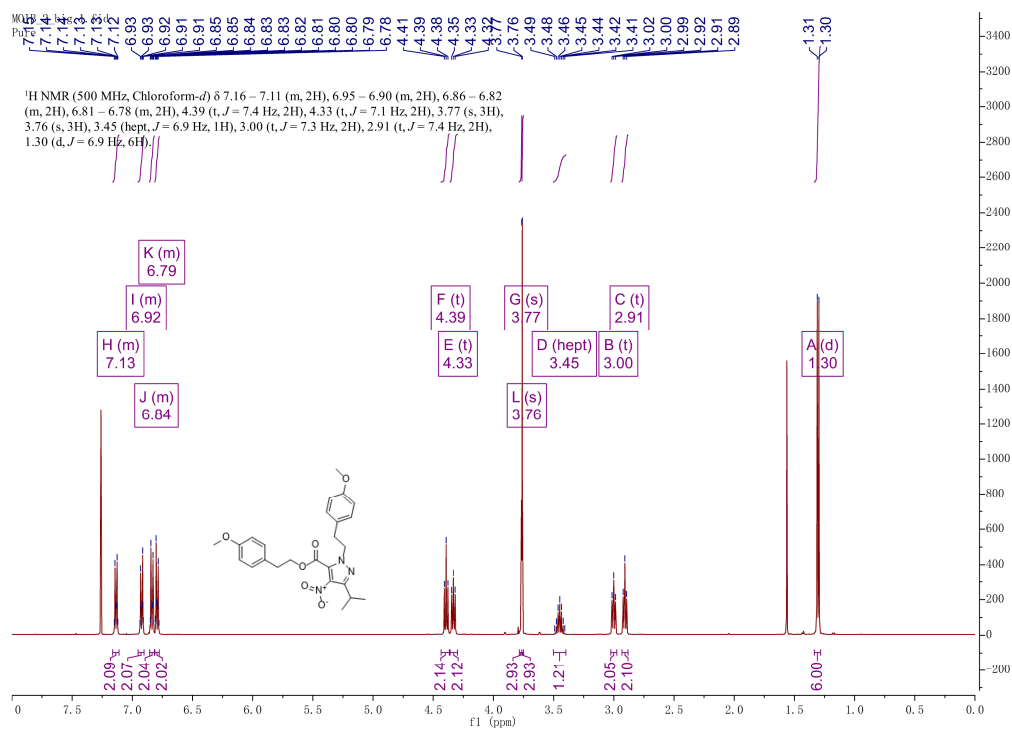

Figure S51. <sup>1</sup>H NMR spectrum of compound **18e**.

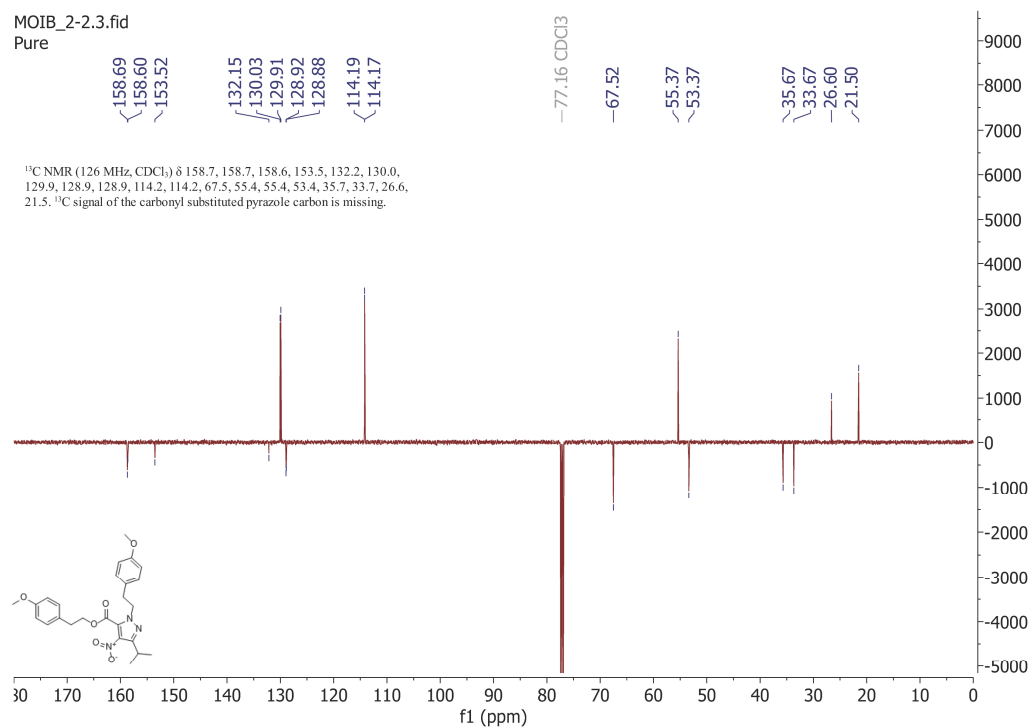

Figure S52. <sup>13</sup>C NMR spectrum of compound **18e**.

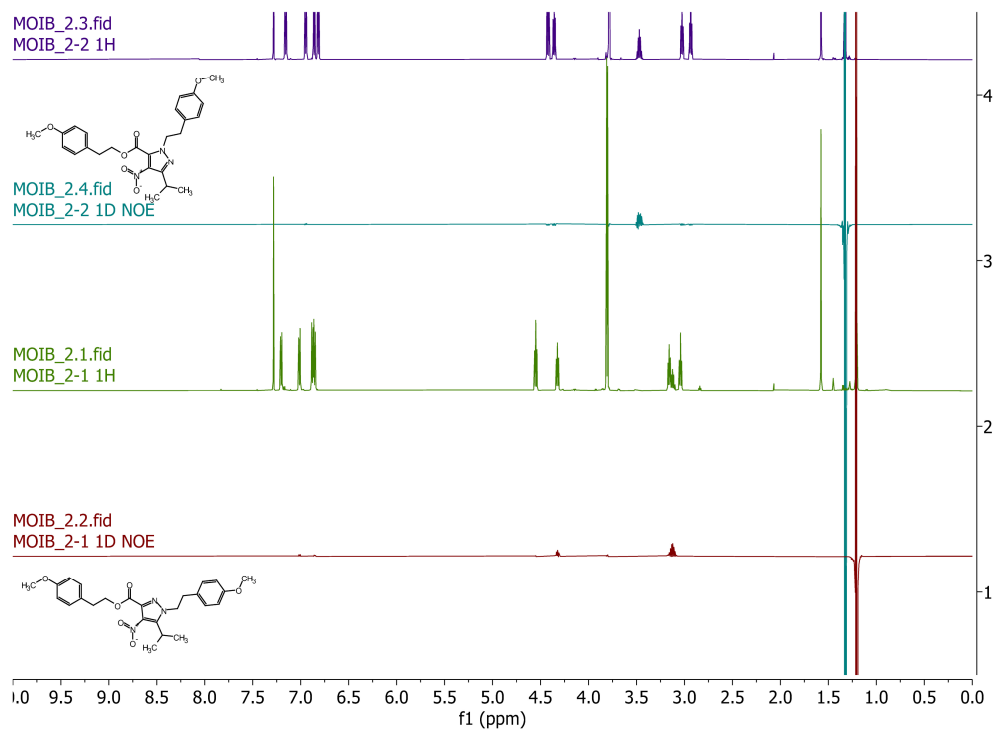

Figure S53. 1D NOESY spectrum of compound **18e** and its regioisomer.

Acquired by : Admin  
 Date Acquired : 2/7/2019 11:38:22 AM  
 Sample Name : YAZH\_44  
 Sample ID :  
 Tray# : 1  
 Vial# : 3  
 Injection Volume : 3  
 Data File : C:\LabSolutions\Data\2019\2019-wk27\YAZH\_44-20190702.lcd  
 Background File : 19.lcd  
 Method File : Method SCAN ACID standard.lcm  
 Report Format : DefaultLCMS.lcr  
 Tuning File : C:\LabSolutions\Tuning\Tuning-ESI-pos-neg\01072015a.lct  
 Processed by : Admin  
 Modified Date : 2/7/2019 12:25:47 PM

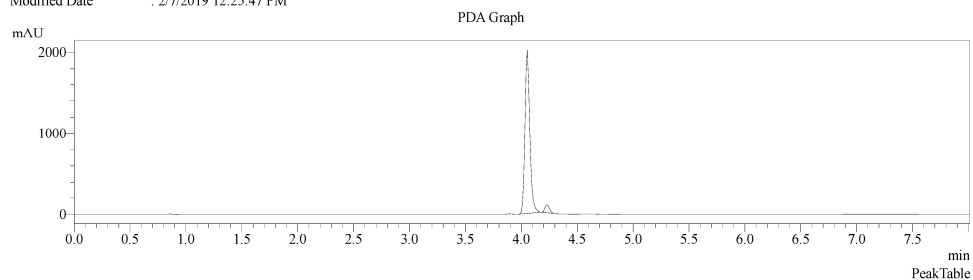

PDA Ch1 254nm 4nm

| Peak# | Name | Ret. Time | Area    | Area % |
|-------|------|-----------|---------|--------|
| 1     |      | 4.047     | 6035513 | 95.733 |
| 2     |      | 4.223     | 269043  | 4.267  |

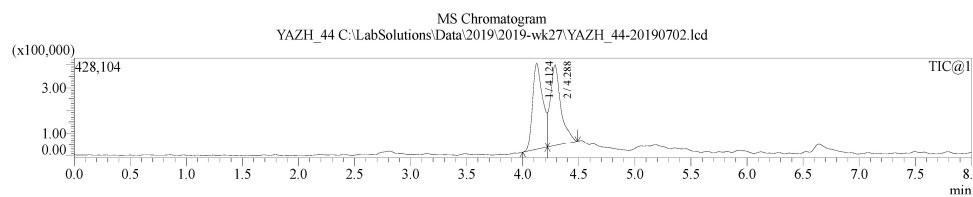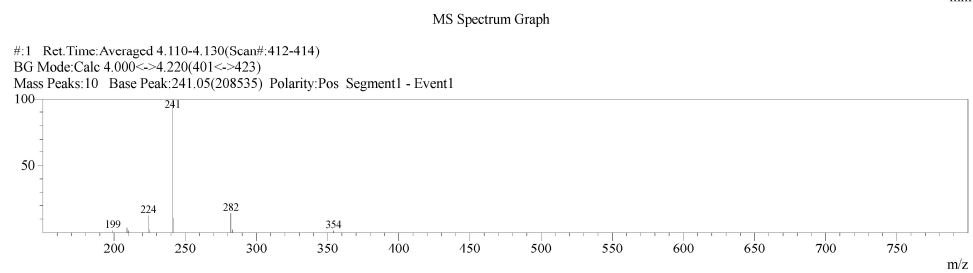

MS Spectrum Table

#1 Ret.Time:  
 BG Mode:Calc 4.000<->4.220(401<->423)  
 Mass Peaks:10 Base Peak:241.05(208535) Polarity:Pos Segment1 - Event1

| # | m/z    | Abs.Inten. | Rel.Inten. | Charge | Polarity | Monoisotopic | #  | m/z    | Abs.Inten. | Rel.Inten. | Charge | Polarity | Monoisotopic |
|---|--------|------------|------------|--------|----------|--------------|----|--------|------------|------------|--------|----------|--------------|
| 1 | 198.90 | 3110       | 1.49       |        |          |              | 6  | 241.05 | 208535     | 100.00     |        |          |              |
| 2 | 209.05 | 7479       | 3.59       |        |          |              | 7  | 242.00 | 22572      | 10.82      |        |          |              |
| 3 | 209.95 | 2828       | 1.36       |        |          |              | 8  | 282.05 | 29765      | 14.27      |        |          |              |
| 4 | 224.00 | 26262      | 12.59      |        |          |              | 9  | 283.10 | 4444       | 2.13       |        |          |              |
| 5 | 225.05 | 4312       | 2.07       |        |          |              | 10 | 354.10 | 2765       | 1.33       |        |          |              |

Figure S54. LCMS spectrum of compound 19c.



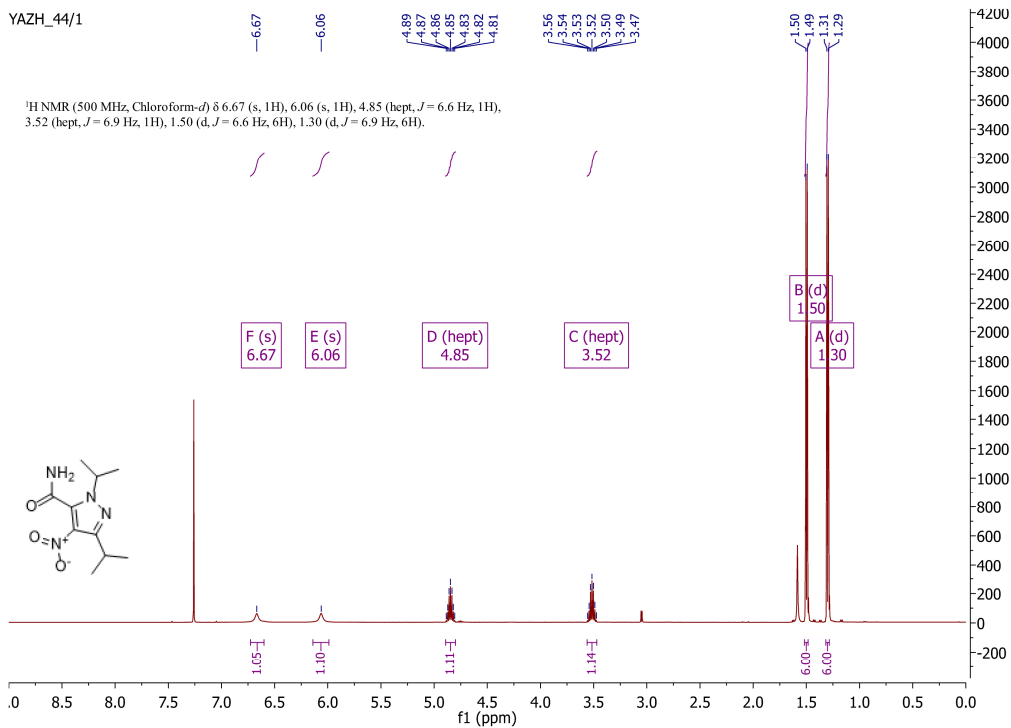

Figure S55. <sup>1</sup>H NMR spectrum of compound **19c**.

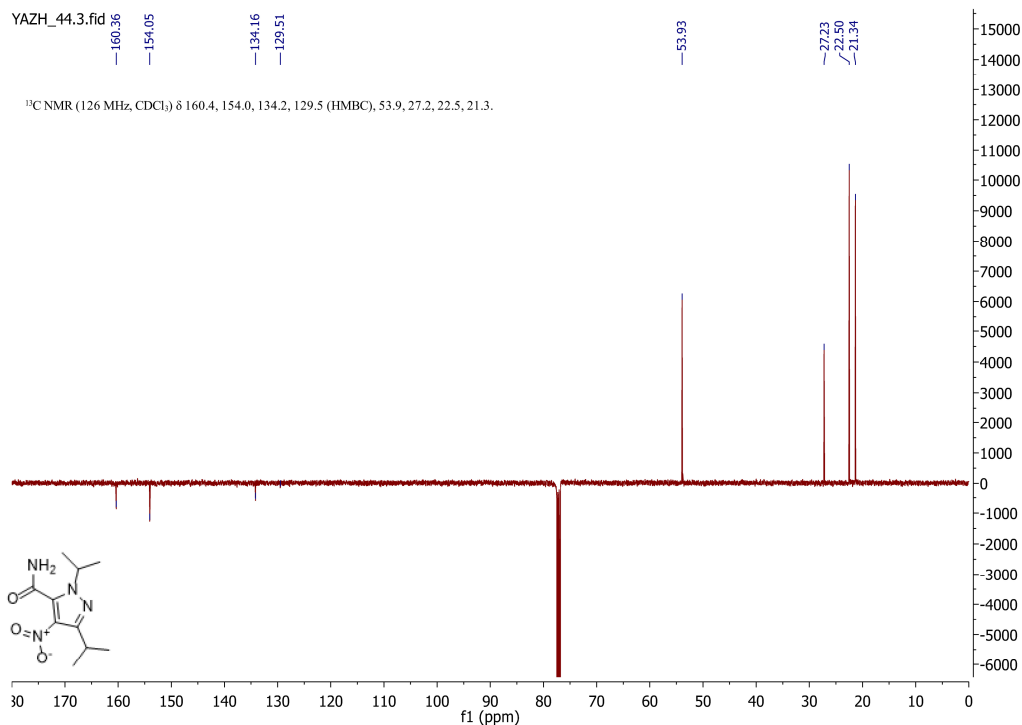

Figure S56. <sup>13</sup>C NMR spectrum of compound **19c**.

Acquired by : Admin  
 Date Acquired : 1/5/2019 4:50:28 PM  
 Sample Name : MOIB\_9-6  
 Sample ID :  
 Tray# : 1  
 Vial# : 54  
 Injection Volume : 1  
 Data File : C:\LabSolutions\Data\2019\2019-wk18\MOIB\_9-6.lcd  
 Background File : blanco 01052019.lcd  
 Method File : Method SCAN ACID standard.lcm  
 Report Format : DefaultL.CMS.lcr  
 Tuning File : C:\LabSolutions\Tuning\Tuning-ESI-pos-neg01072015a.lct  
 Processed by : Admin  
 Modified Date : 6/4/2021 10:57:17 AM

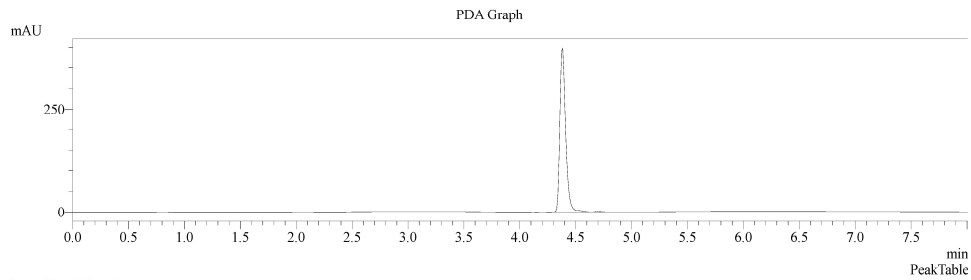

| Peak# | Name | Ret. Time | Area    | Area % |
|-------|------|-----------|---------|--------|
| 1     |      | 4.374     | 1419030 | 99.676 |
| 2     |      | 4.691     | 4610    | 0.324  |

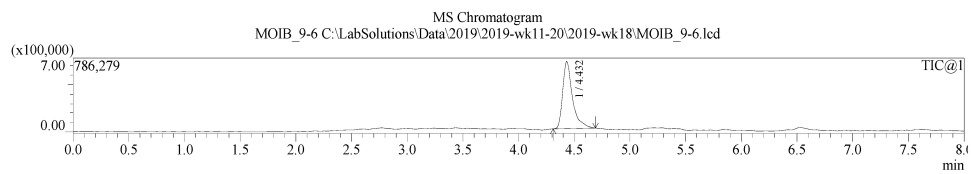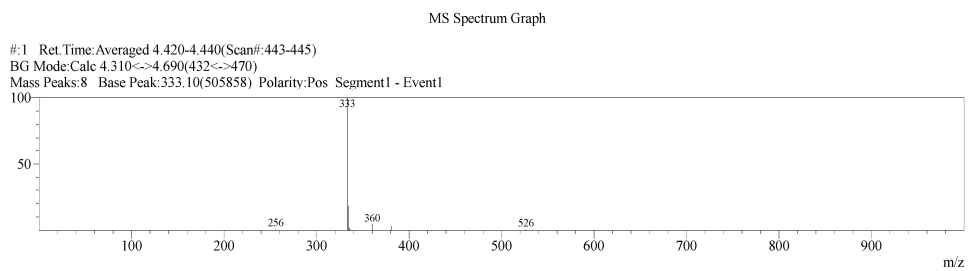

MS Spectrum Table

#1 Ret Time:  
 BG Mode: Calc 4.310<->4.690(432<->470)  
 Mass Peaks: 8 Base Peak: 333.10(505858) Polarity: Pos Segment1 - Event1

| # | m/z    | Abs.Inten. | Rel.Inten. | Charge | Polarity | Monoisotopic | # | m/z    | Abs.Inten. | Rel.Inten. | Charge | Polarity | Monoisotopic |
|---|--------|------------|------------|--------|----------|--------------|---|--------|------------|------------|--------|----------|--------------|
| 1 | 255.90 | 6300       | 1.25       |        |          |              | 5 | 336.20 | 5295       | 1.05       |        |          |              |
| 2 | 333.10 | 505858     | 100.00     |        |          |              | 6 | 360.10 | 23540      | 4.65       |        |          |              |
| 3 | 334.15 | 92961      | 18.38      |        |          |              | 7 | 380.85 | 15211      | 3.01       |        |          |              |
| 4 | 335.15 | 11248      | 2.22       |        |          |              | 8 | 526.30 | 5702       | 1.13       |        |          |              |

Figure S57. LCMS spectrum of compound 19e.

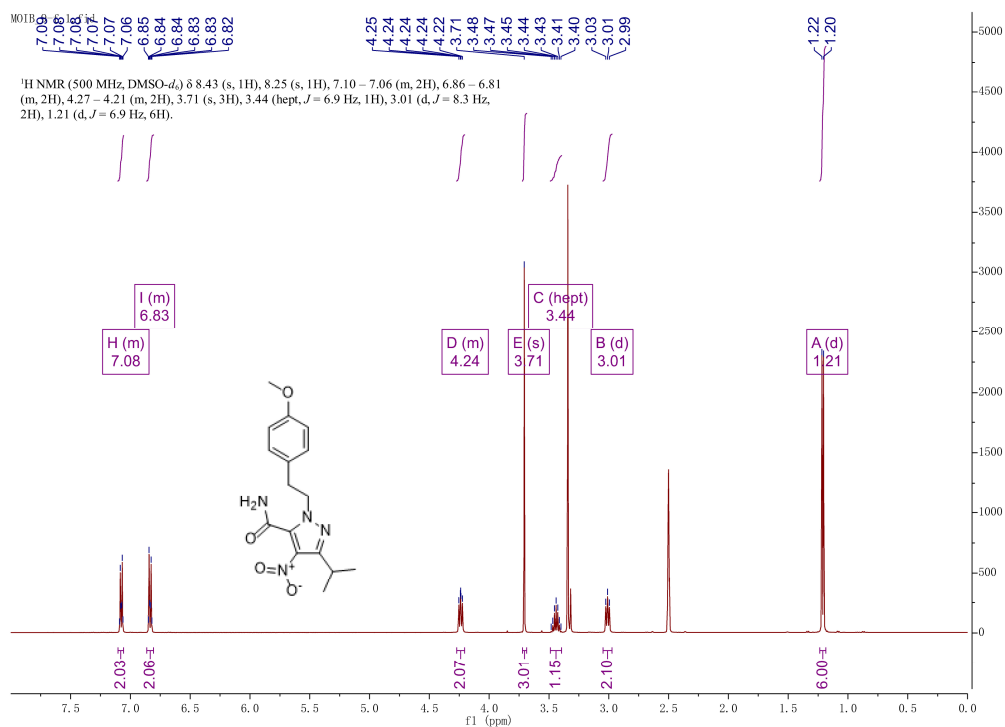

Figure S58.  $^1\text{H NMR}$  spectrum of compound **19e**.

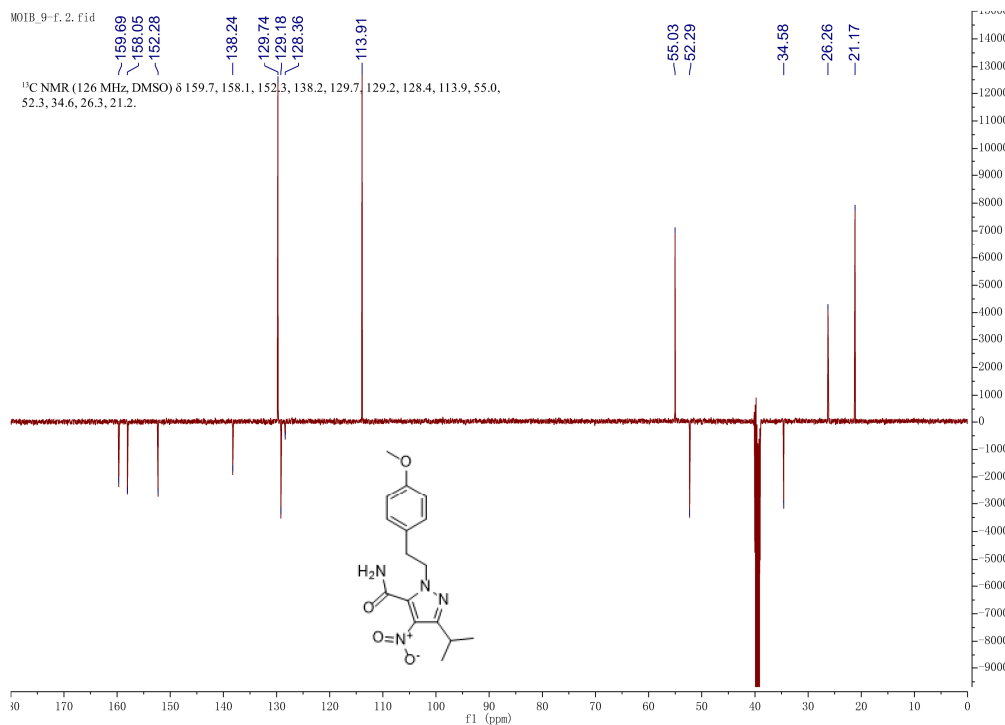

Figure S59.  $^{13}\text{C NMR}$  spectrum of compound **19e**.

Acquired by : Admin  
 Date Acquired : 26/6/2019 10:12:06 AM  
 Sample Name : MOIB\_20\_pure  
 Sample ID :  
 Tray# : 1  
 Vial# : 3  
 Injection Volume : 1  
 Data File : C:\LabSolutions\Data\2019\2019-wk26\MOIB\_20\_pure.lcd  
 Background File : Blanco 26062019.lcd  
 Method File : Method SCAN ACID standard.lcm  
 Report Format : DefaultLCMS.lcr  
 Tuning File : C:\LabSolutions\Tuning\Tuning-ESI-pos-neg01072015a.lct  
 Processed by : Admin  
 Modified Date : 26/6/2019 10:41:04 AM

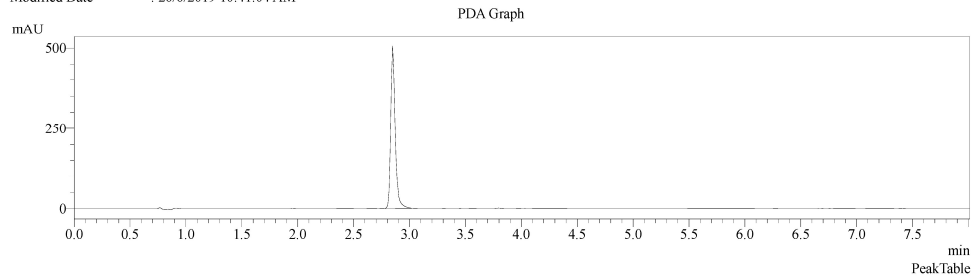

| Peak# | Name | Ret. Time | Area    | Area %  |
|-------|------|-----------|---------|---------|
| 1     |      | 2.844     | 1429628 | 100.000 |

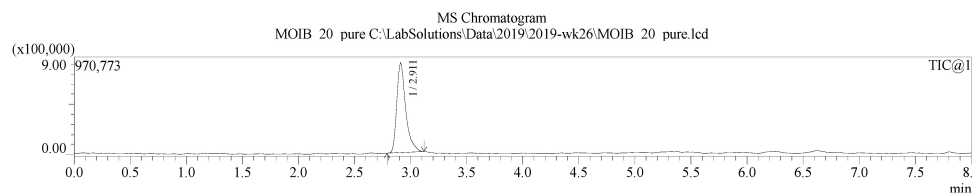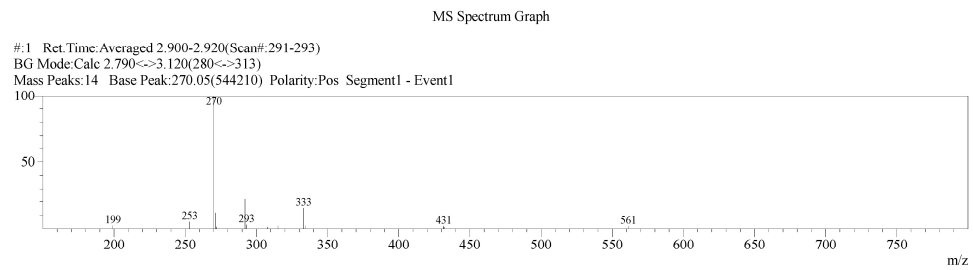

MS Spectrum Table

#1 Ret.Time:  
 BG Mode:Calc 2.790<->3.120(280<->313)  
 Mass Peaks:14 Base Peak:270.05(544210) Polarity:Pos Segment1 - Event1

| # | m/z    | Abs.Inten. | Rel.Inten. | Charge | Polarity | Monoisotopic | #  | m/z    | Abs.Inten. | Rel.Inten. | Charge | Polarity | Monoisotopic |
|---|--------|------------|------------|--------|----------|--------------|----|--------|------------|------------|--------|----------|--------------|
| 1 | 199.05 | 12940      | 2.38       |        |          |              | 8  | 307.95 | 8087       | 1.49       |        |          |              |
| 2 | 253.05 | 28192      | 5.18       |        |          |              | 9  | 315.10 | 12831      | 2.36       |        |          |              |
| 3 | 270.05 | 544210     | 100.00     |        |          |              | 10 | 333.10 | 83124      | 15.27      |        |          |              |
| 4 | 271.10 | 63109      | 11.60      |        |          |              | 11 | 334.15 | 11363      | 2.09       |        |          |              |
| 5 | 272.10 | 8015       | 1.47       |        |          |              | 12 | 431.50 | 10826      | 1.99       |        |          |              |
| 6 | 292.05 | 119659     | 21.99      |        |          |              | 13 | 431.85 | 7007       | 1.79       |        |          |              |
| 7 | 293.05 | 16508      | 3.03       |        |          |              | 14 | 561.25 | 10716      | 1.97       |        |          |              |

Figure S60. LCMS spectrum of compound 19f.

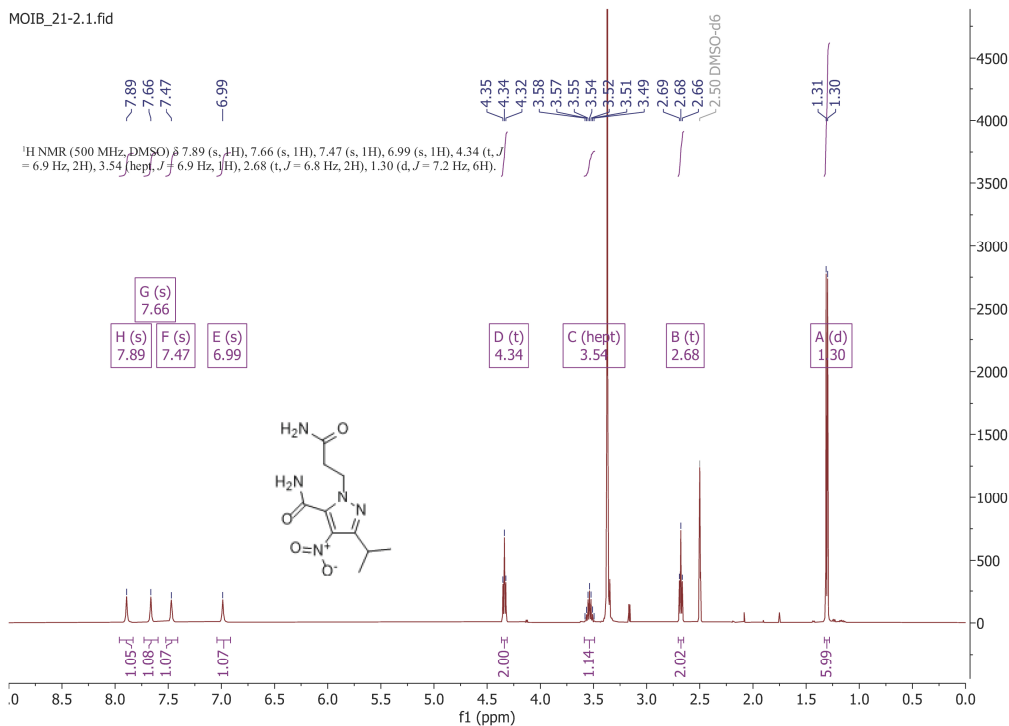

Figure S61.  $^1\text{H}$  NMR spectrum of compound **19f**.

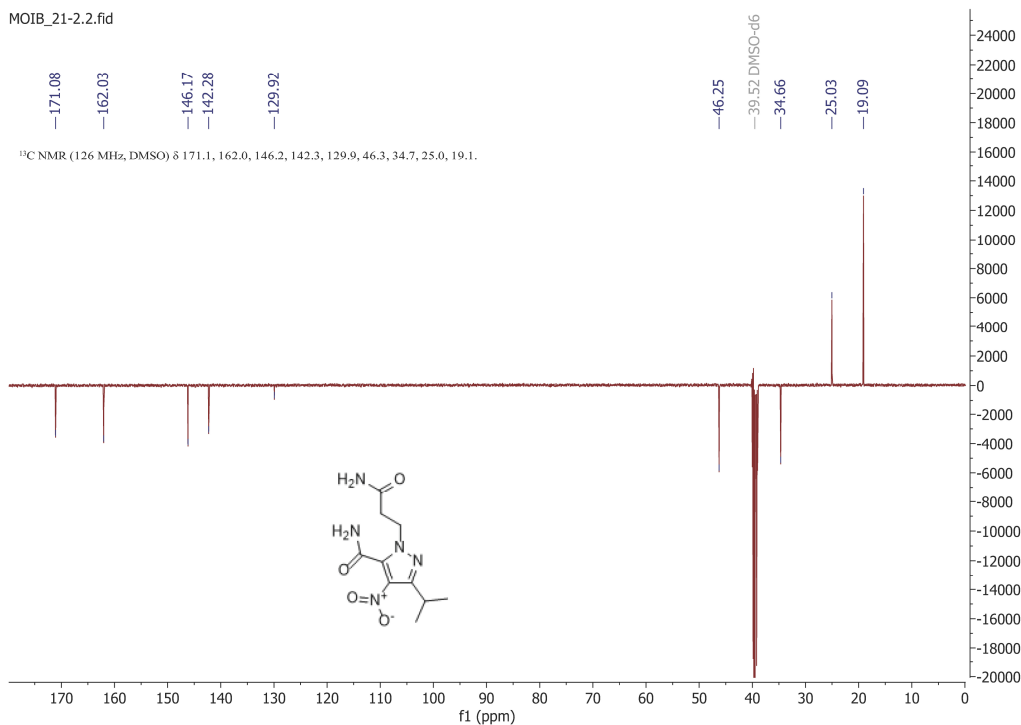

Figure S62.  $^{13}\text{C}$  NMR spectrum of compound **19f**.

Acquired by : Admin  
 Date Acquired : 21/6/2019 1:13:59 PM  
 Sample Name : MOIB\_27-af  
 Sample ID :  
 Tray# : 1  
 Vial# : 23  
 Injection Volume : 1  
 Data File : C:\LabSolutions\Data\2019\2019-wk25\MOIB\_27-af.lcd  
 Background File : blanco\_an 21062019.lcd  
 Method File : Method SCAN ACID standard.lcm  
 Report Format : DefaultL.CMS.lcr  
 Tuning File : C:\LabSolutions\Tuning\Tuning-ESI-pos-neg01072015a.lct  
 Processed by : Admin  
 Modified Date : 21/6/2019 1:27:50 PM

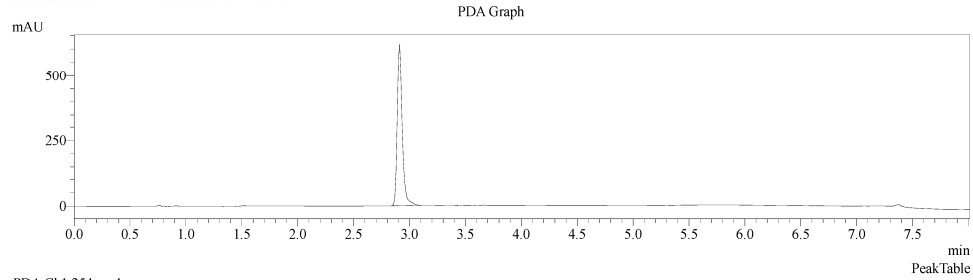

| Peak# | Name | Ret. Time | Area    | Area %  |
|-------|------|-----------|---------|---------|
| 1     |      | 2.904     | 1902079 | 100.000 |

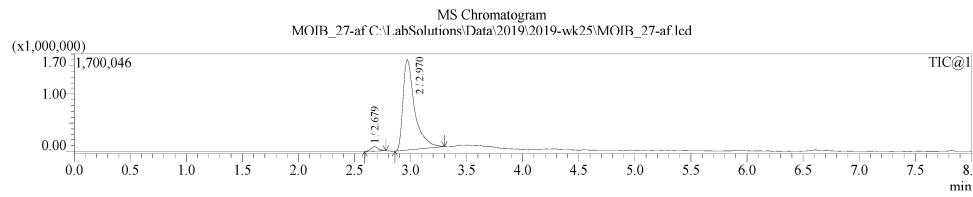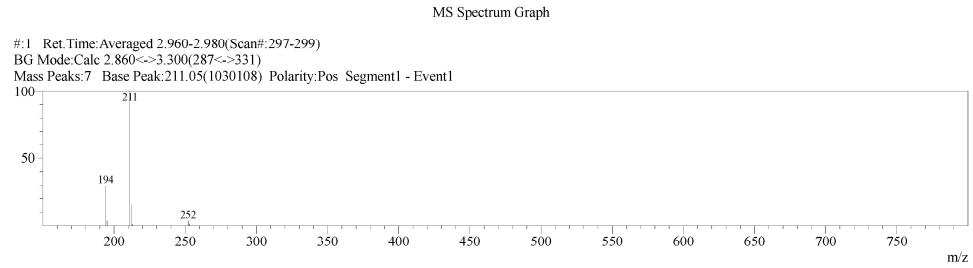

MS Spectrum Table

#1 Ret.Time:  
 BG Mode: Calc 2.860<->3.300(287<->331)  
 Mass Peaks: 7 Base Peak: 211.05(1030108) Polarity: Pos Segment1 - Event1

| # | m/z    | Abs.Inten. | Rel.Inten. | Charge | Polarity | Monoisotopic | # | m/z    | Abs.Inten. | Rel.Inten. | Charge | Polarity | Monoisotopic |
|---|--------|------------|------------|--------|----------|--------------|---|--------|------------|------------|--------|----------|--------------|
| 1 | 194.00 | 309501     | 30.05      |        |          |              | 5 | 213.10 | 13033      | 1.27       |        |          |              |
| 2 | 195.05 | 36760      | 3.57       |        |          |              | 6 | 252.10 | 37148      | 3.61       |        |          |              |
| 3 | 211.05 | 1030108    | 100.00     |        |          |              | 7 | 253.05 | 14027      | 1.36       |        |          |              |
| 4 | 212.05 | 159664     | 15.50      |        |          |              |   |        |            |            |        |          |              |

Figure S63. LCMS spectrum of compound **20b**.

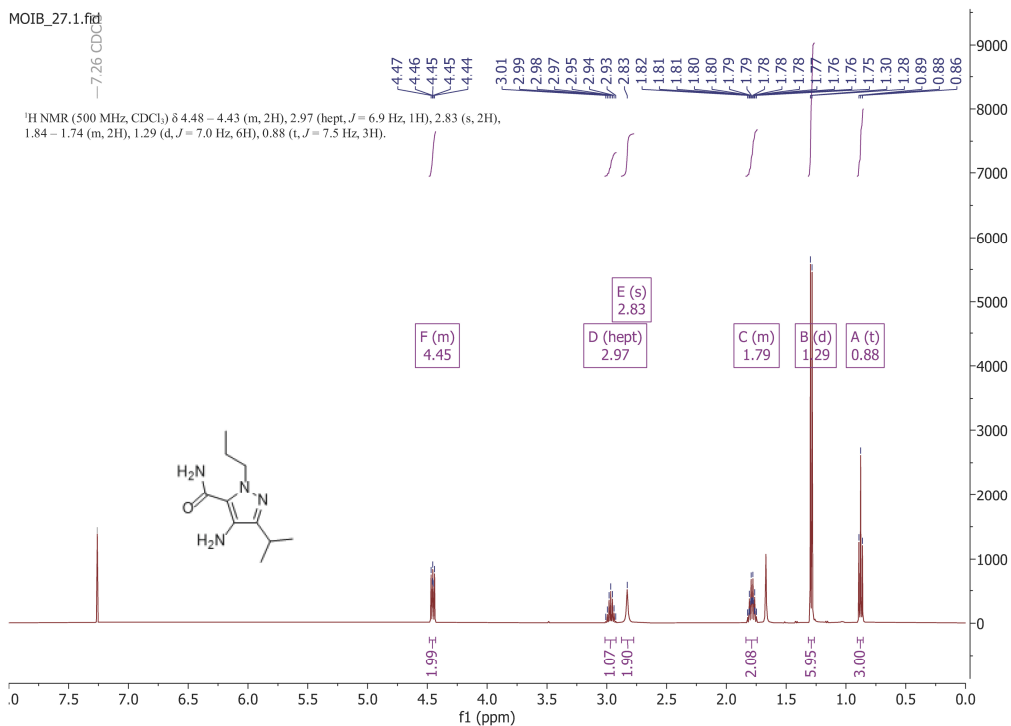

Figure S64. <sup>1</sup>H NMR spectrum of compound **20b**.

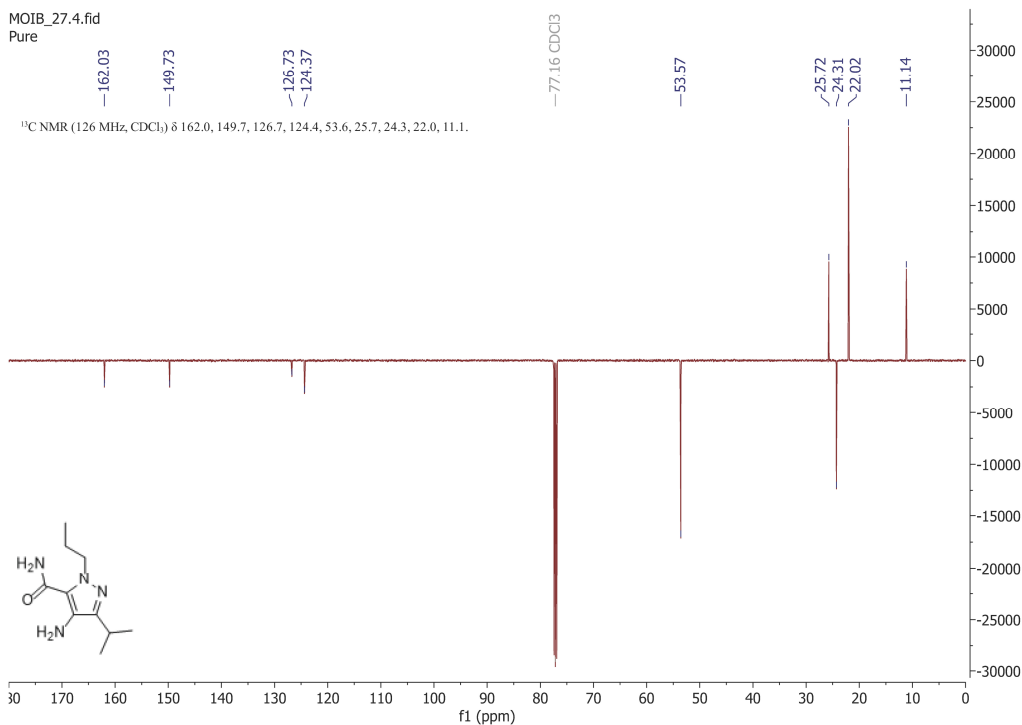

Figure S65. <sup>13</sup>C NMR spectrum of compound **20b**.

Acquired by : Admin  
 Date Acquired : 10/4/2019 9:48:23 AM  
 Sample Name : MOIB\_6\_pure  
 Sample ID :  
 Tray# : 1  
 Vial# : 44  
 Injection Volume : 1  
 Data File : C:\LabSolutions\Data\2019\2019-wk15\MOIB\_6\_pure.lcd  
 Background File : blanco 10042019.lcd  
 Method File : Method SCAN ACID standard.lcm  
 Report Format : DefaultL.CMS.lcr  
 Tuning File : C:\LabSolutions\Tuning\Tuning-ESI-pos-neg01072015a.lct  
 Processed by : Admin  
 Modified Date : 30/3/2021 5:22:22 PM

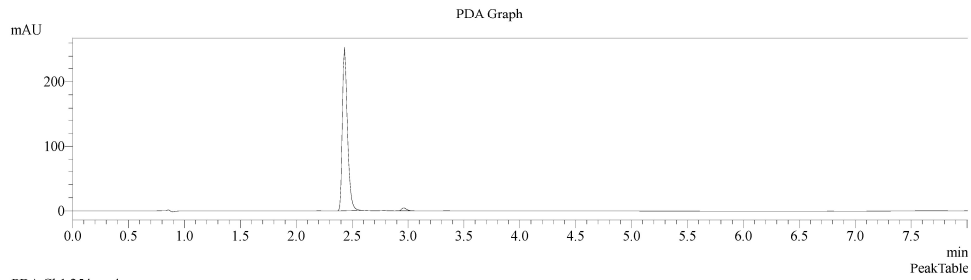

| Peak# | Name | Ret. Time | Area   | Area % |
|-------|------|-----------|--------|--------|
| 1     |      | 2.426     | 794189 | 98.234 |
| 2     |      | 2.956     | 14276  | 1.766  |

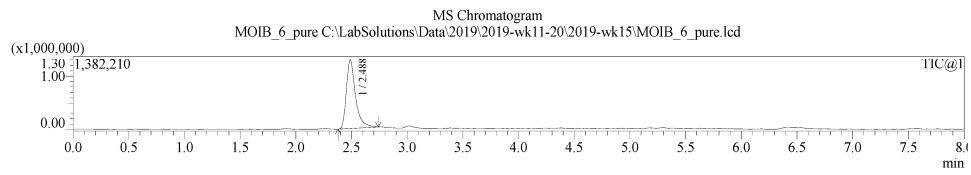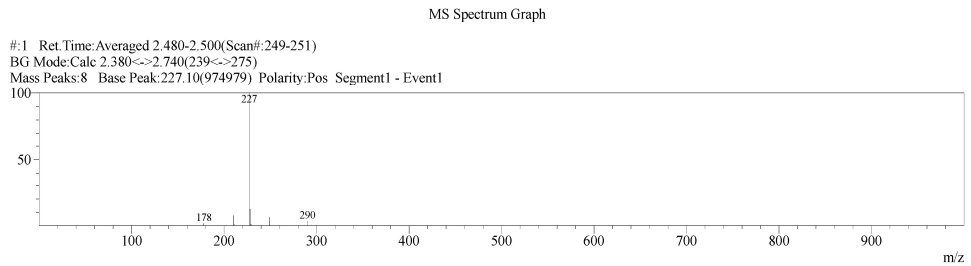

MS Spectrum Table

#1 Ret Time: 2.488  
 BG Mode: Calc 2.380<->2.740(239<->275)  
 Mass Peaks: 8 Base Peak: 227.10(974979) Polarity: Pos Segment1 - Event1

| # | m/z    | Abs.Inten. | Rel.Inten. | Charge | Polarity | Monoisotopic | # | m/z    | Abs.Inten. | Rel.Inten. | Charge | Polarity | Monoisotopic |
|---|--------|------------|------------|--------|----------|--------------|---|--------|------------|------------|--------|----------|--------------|
| 1 | 178.05 | 16005      | 1.64       |        |          |              | 5 | 228.05 | 121523     | 12.46      |        |          |              |
| 2 | 210.05 | 73336      | 7.52       |        |          |              | 6 | 229.10 | 11674      | 1.20       |        |          |              |
| 3 | 211.10 | 12632      | 1.30       |        |          |              | 7 | 249.05 | 60850      | 6.24       |        |          |              |
| 4 | 227.10 | 974979     | 100.00     |        |          |              | 8 | 290.10 | 32523      | 3.34       |        |          |              |

Figure S66. LCMS spectrum of compound **20d**.



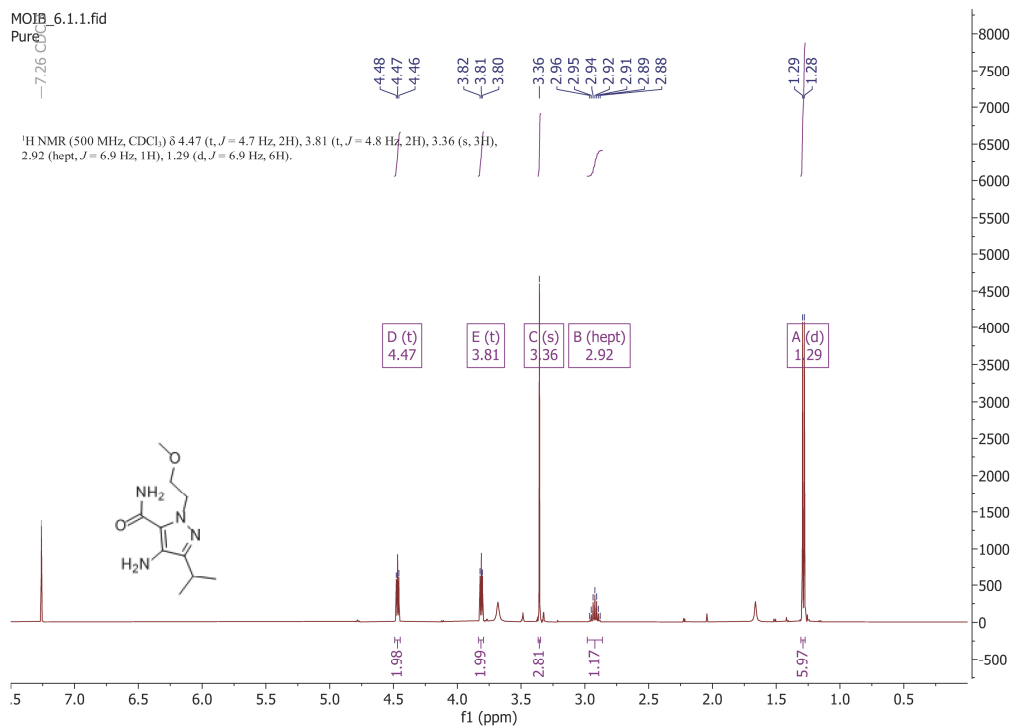

Figure S67. <sup>1</sup>H NMR spectrum of compound **20d**.

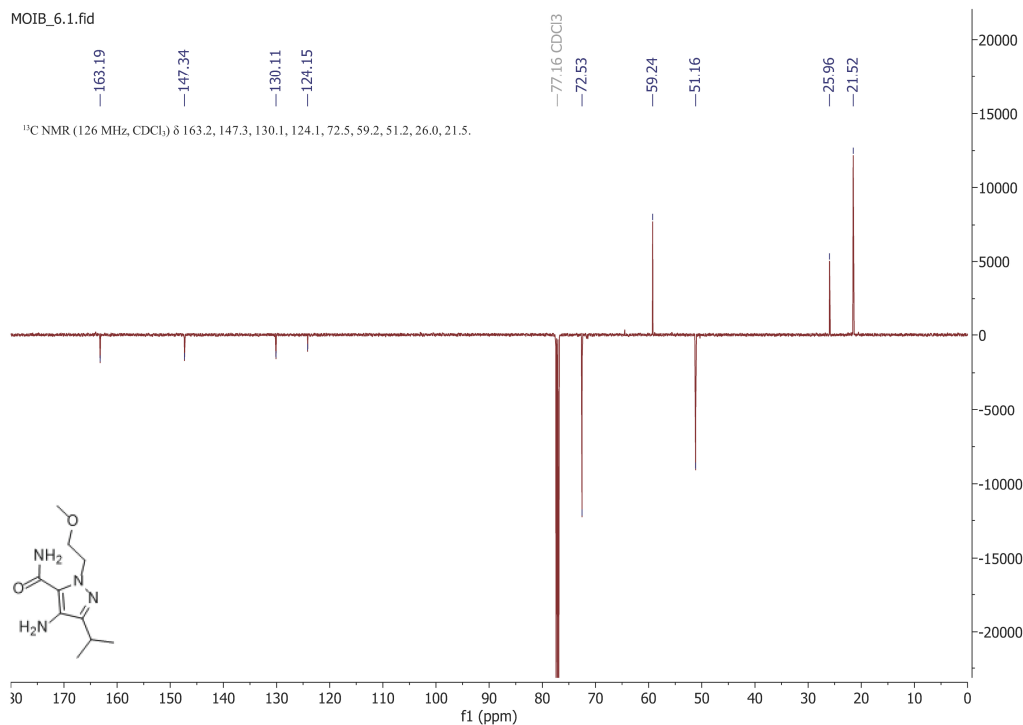

Figure S68. <sup>13</sup>C NMR spectrum of compound **20d**.

Acquired by : Admin  
 Date Acquired : 3/5/2019 4:04:24 PM  
 Sample Name : MOIB\_13-5  
 Sample ID :  
 Tray# : 1  
 Vial# : 42  
 Injection Volume : 1  
 Data File : C:\LabSolutions\Data\2019\2019-wk18\MOIB\_13-5.lcd  
 Background File : blanco 03052019.lcd  
 Method File : Method SCAN ACID standard.lcm  
 Report Format : DefaultLCMS.lcr  
 Tuning File : C:\LabSolutions\Tuning\Tuning-ESI-pos-neg01072015a.lct  
 Processed by : Admin  
 Modified Date : 3/5/2019 4:13:44 PM

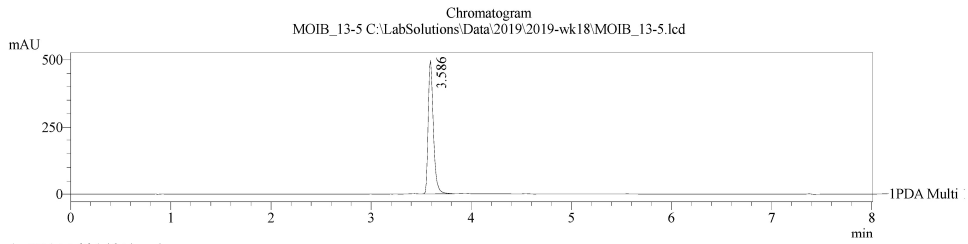

| Peak# | Name | Ret. Time | Area    | Area %  |
|-------|------|-----------|---------|---------|
| 1     |      | 3.586     | 1786961 | 100.000 |

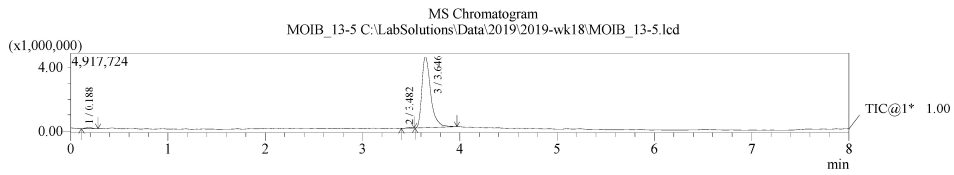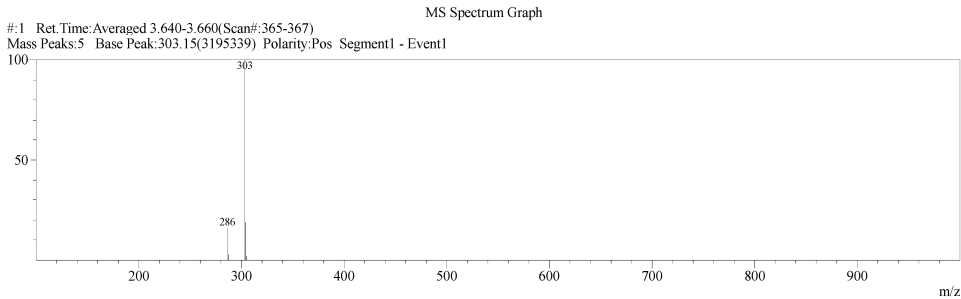

MS Spectrum Table

| # | m/z    | Abs.Inten. | Rel.Inten. | Charge | Polarity | Monoisotopic | # | m/z    | Abs.Inten. | Rel.Inten. | Charge | Polarity | Monoisotopic |
|---|--------|------------|------------|--------|----------|--------------|---|--------|------------|------------|--------|----------|--------------|
| 1 | 286.05 | 521756     | 16.33      |        |          |              | 4 | 304.15 | 606797     | 18.99      |        |          |              |
| 2 | 287.10 | 88123      | 2.76       |        |          |              | 5 | 305.15 | 63853      | 2.00       |        |          |              |
| 3 | 303.15 | 3195339    | 100.00     |        |          |              |   |        |            |            |        |          |              |

Figure S69. LCMS spectrum of compound 20e.

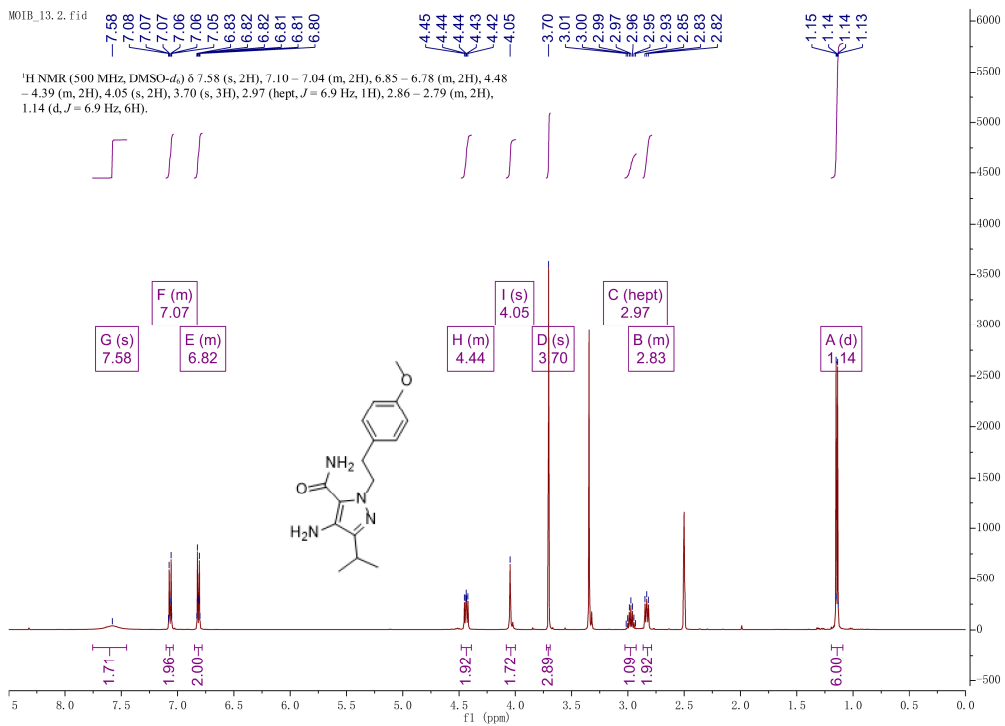

Figure S70. <sup>1</sup>H NMR spectrum of compound 20e.

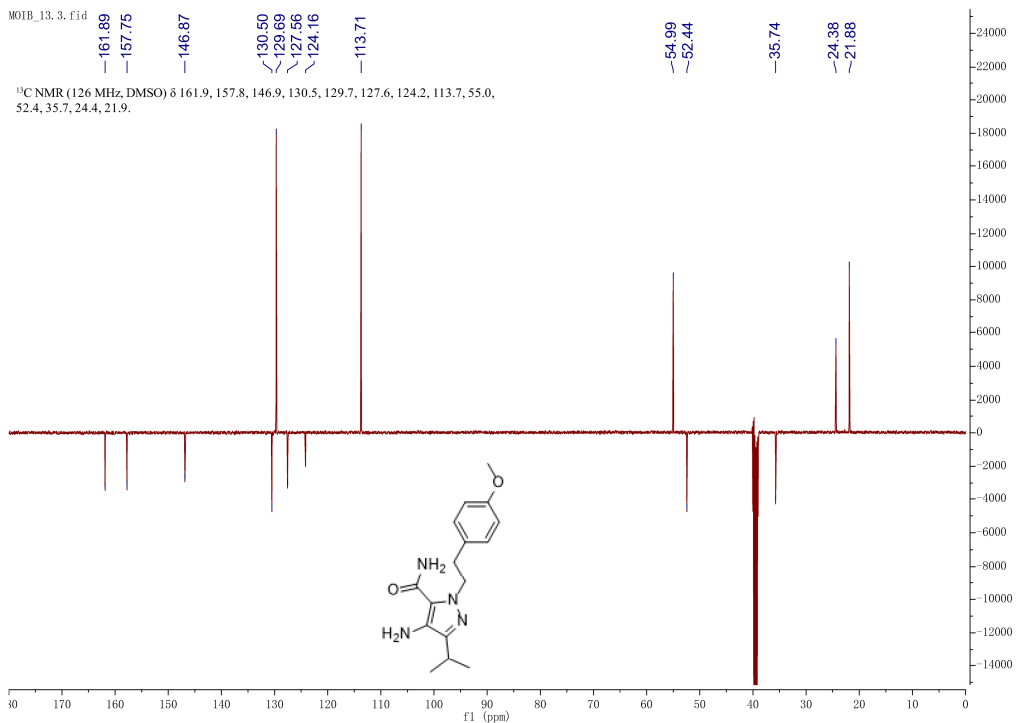

Figure S71. <sup>13</sup>C NMR spectrum of compound 20e.

Acquired by : Admin  
 Date Acquired : 17/4/2019 1:15:29 PM  
 Sample Name : YAZH\_40\_20190417  
 Sample ID :  
 Tray# : 1  
 Vial# : 7  
 Injection Volume : 1  
 Data File : C:\LabSolutions\Data\2019\2019-wk16\YAZH\_40\_20190417.lcd  
 Background File : blanco\_17042019.lcd  
 Method File : Method SCAN ACID standard.lcm  
 Report Format : DefaultL.CMS.lcr  
 Tuning File : C:\LabSolutions\Tuning\Tuning-ESI-pos-neg01072015a.lct  
 Processed by : Admin  
 Modified Date : 17/4/2019 2:32:24 PM

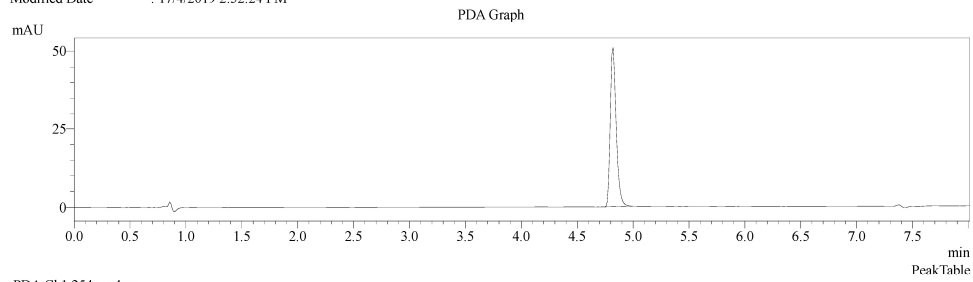

| Peak# | Name | Ret. Time | Area   | Area %  |
|-------|------|-----------|--------|---------|
| 1     |      | 4.813     | 187701 | 100.000 |

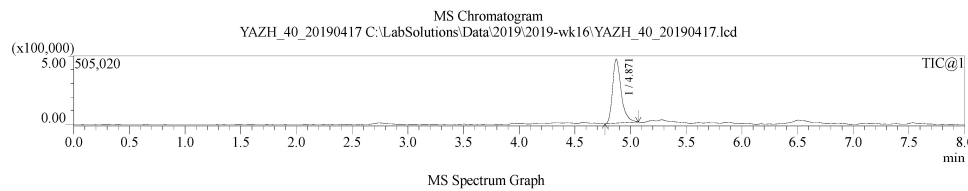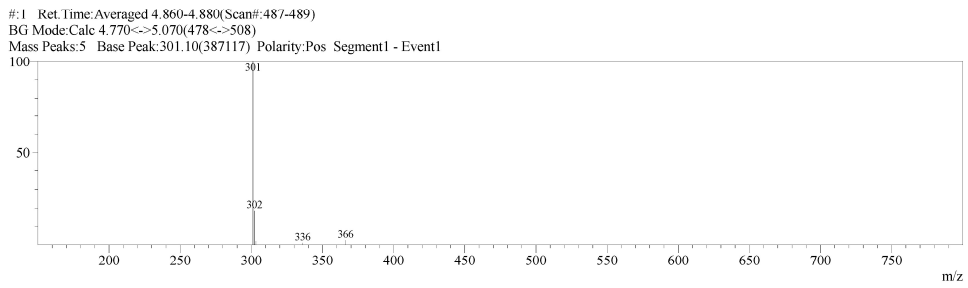

MS Spectrum Table

#1 Ret Time:  
 BG Mode: Calc 4.770-<->5.070(478-<->508)  
 Mass Peaks: 5 Base Peak: 301.10(387117) Polarity: Pos Segment1 - Event1

| # | m/z    | Abs.Inten. | Rel.Inten. | Charge | Polarity | Monoisotopic | # | m/z    | Abs.Inten. | Rel.Inten. | Charge | Polarity | Monoisotopic |
|---|--------|------------|------------|--------|----------|--------------|---|--------|------------|------------|--------|----------|--------------|
| 1 | 301.10 | 387117     | 100.00     |        |          |              | 4 | 336.10 | 3948       | 1.02       |        |          |              |
| 2 | 302.10 | 72822      | 18.81      |        |          |              | 5 | 366.25 | 9420       | 2.43       |        |          |              |
| 3 | 303.15 | 7328       | 1.89       |        |          |              |   |        |            |            |        |          |              |

Figure S72. LCMS spectrum of compound **21a**.

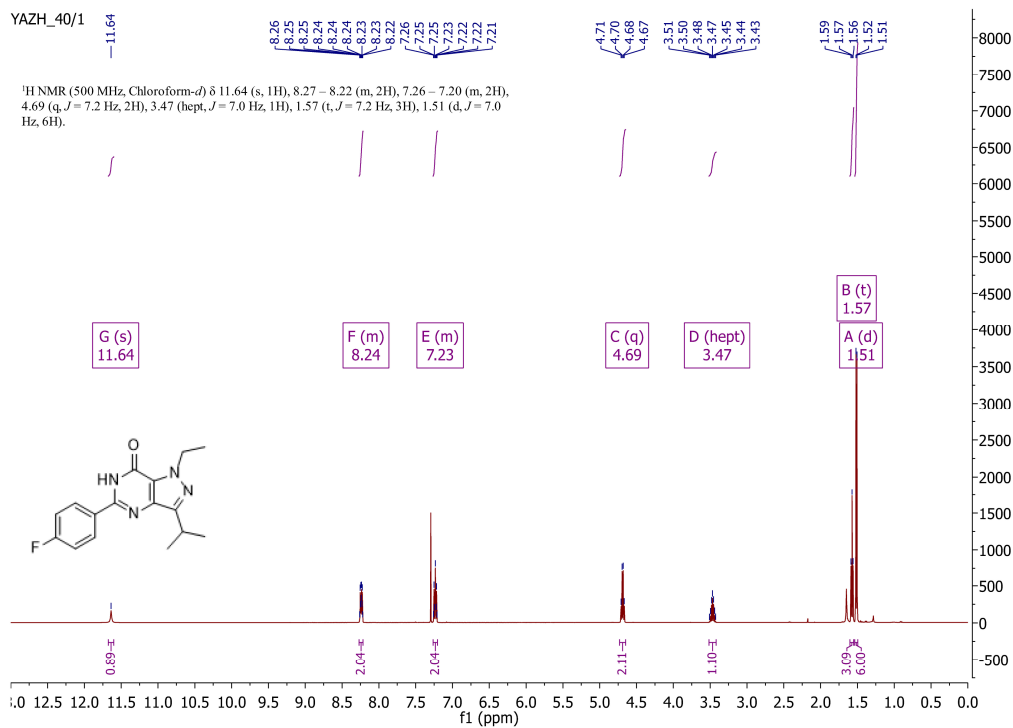

Figure S73. <sup>1</sup>H NMR spectrum of compound 21a.

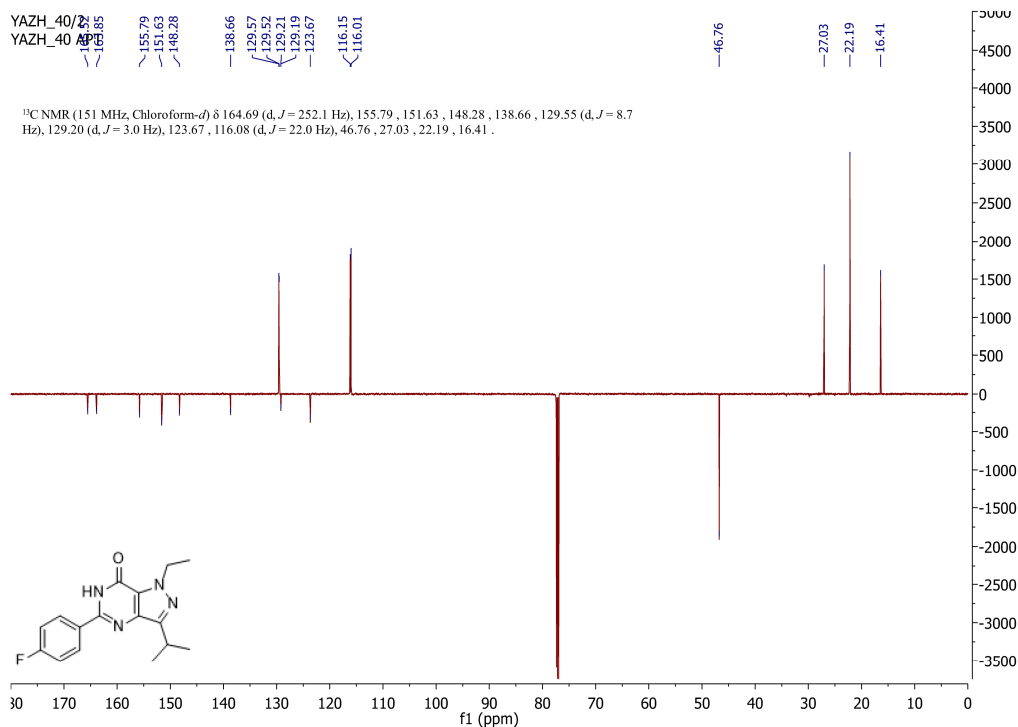

Figure S74. <sup>13</sup>C NMR spectrum of compound 21a.

Acquired by : Admin  
 Date Acquired : 27/6/2019 2:18:26 PM  
 Sample Name : MOIB\_28\_rc\_pure  
 Sample ID :  
 Tray# : 1  
 Vial# : 43  
 Injection Volume : 1  
 Data File : C:\LabSolutions\Data\2019\2019-wk26\MOIB\_28\_rc\_pure.lcd  
 Background File : blanco 27062019.lcd  
 Method File : Method SCAN ACID standard.lcm  
 Report Format : DefaultLCMS.lcr  
 Tuning File : C:\LabSolutions\Tuning\Tuning-ESI-pos-neg01072015a.lct  
 Processed by : Admin  
 Modified Date : 27/6/2019 2:31:01 PM

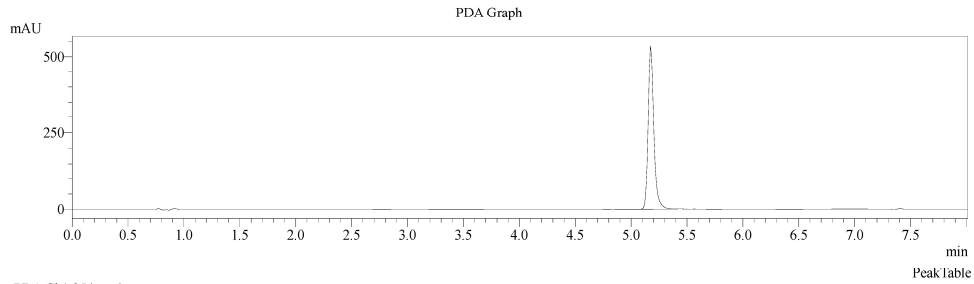

Peak Table

| Peak# | Name | Ret. Time | Area    | Area %  |
|-------|------|-----------|---------|---------|
| 1     |      | 5.170     | 1889998 | 100.000 |

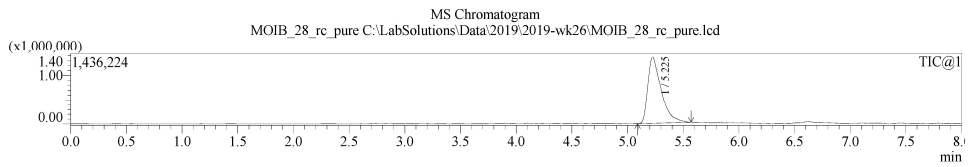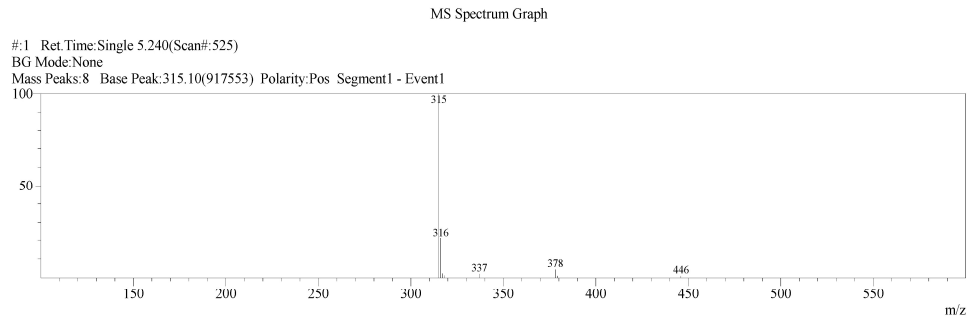

MS Spectrum Table

#1 Ret. Time:  
 BG Mode:None  
 Mass Peaks:8 Base Peak:315.10(917553) Polarity:Pos Segment1 - Event1

| # | m/z    | Abs.Inten. | Rel.Inten. | Charge | Polarity | Monoisotopic | # | m/z    | Abs.Inten. | Rel.Inten. | Charge | Polarity | Monoisotopic |
|---|--------|------------|------------|--------|----------|--------------|---|--------|------------|------------|--------|----------|--------------|
| 1 | 315.10 | 917553     | 100.00     |        |          |              | 5 | 337.05 | 18540      | 2.02       |        |          |              |
| 2 | 316.10 | 194142     | 21.16      |        |          |              | 6 | 378.05 | 41095      | 4.48       |        |          |              |
| 3 | 317.00 | 20939      | 2.28       |        |          |              | 7 | 379.10 | 9874       | 1.08       |        |          |              |
| 4 | 318.20 | 11618      | 1.27       |        |          |              | 8 | 446.00 | 9436       | 1.03       |        |          |              |

Figure S75. LCMS spectrum of compound **21b**.

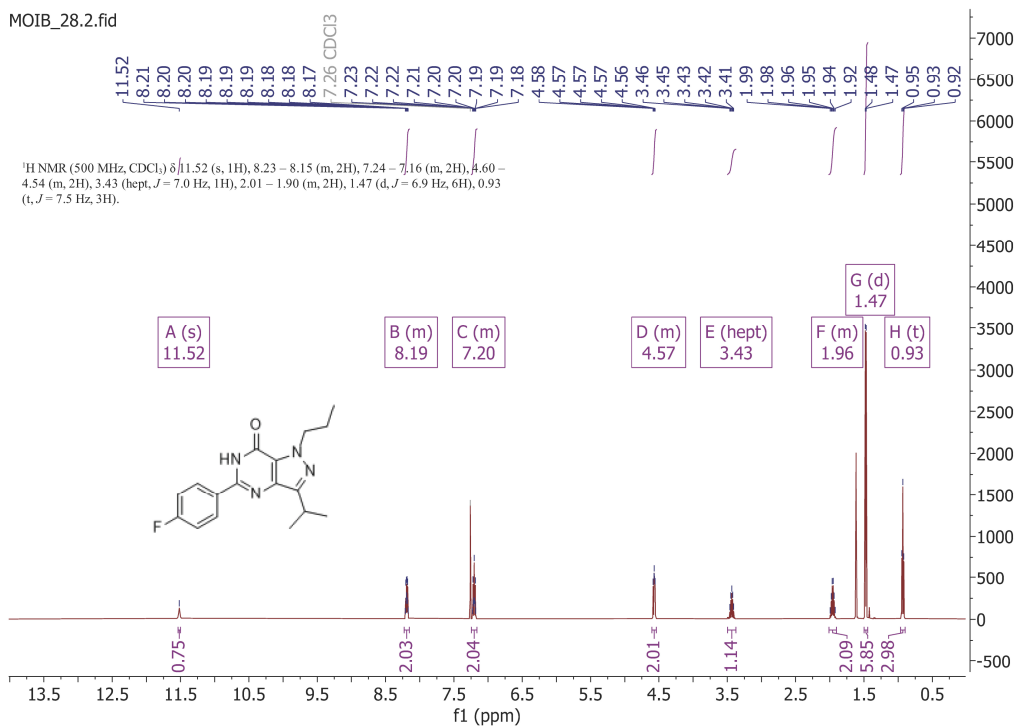

Figure S76. <sup>1</sup>H NMR spectrum of compound **21b**.

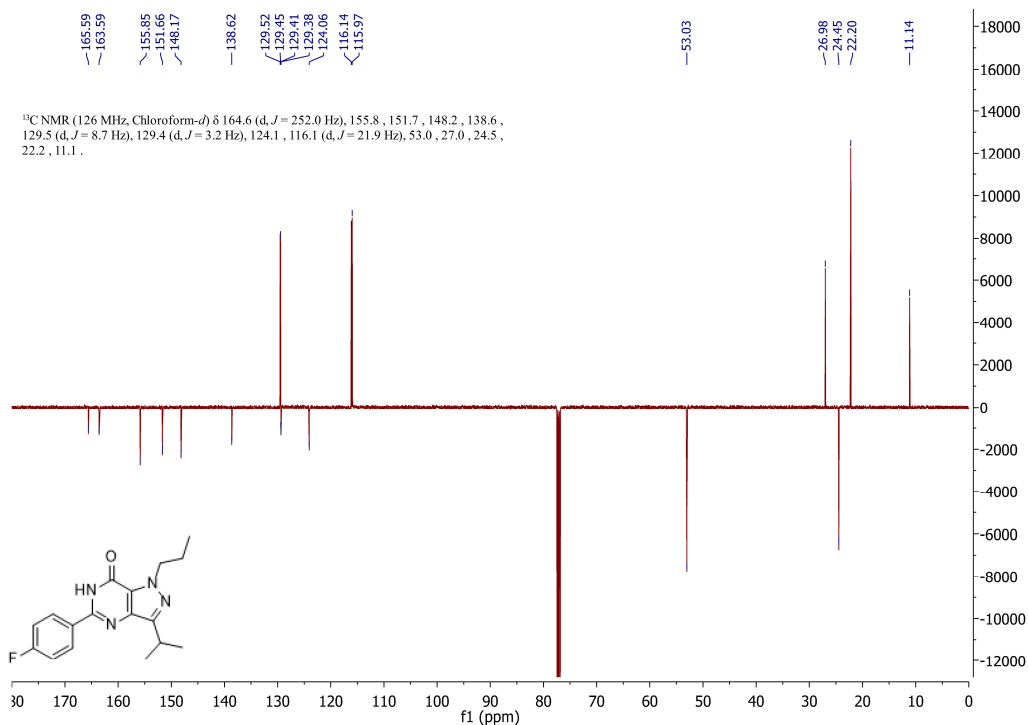

Figure S77. <sup>13</sup>C NMR spectrum of compound **21b**.

Acquired by : Admin  
 Date Acquired : 10/7/2019 10:42:25 AM  
 Sample Name : YAZH\_46  
 Sample ID :  
 Tray# : 1  
 Vial# : 8  
 Injection Volume : 2  
 Data File : C:\LabSolutions\Data\2019\2019-wk28\YAZH\_46.lcd  
 Background File : blanco10072019.lcd  
 Method File : Method SCAN ACID standard.lcm  
 Report Format : Default.LCMS.lcr  
 Tuning File : C:\LabSolutions\Tuning\Tuning-ESI-pos-neg01072015a.lct  
 Processed by : Admin  
 Modified Date : 10/7/2019 11:01:10 AM

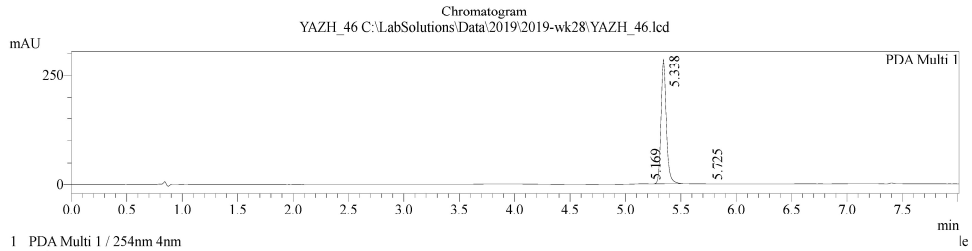

| Peak# | Name | Ret. Time | Area   | Area % |
|-------|------|-----------|--------|--------|
| 1     |      | 5.169     | 1664   | 0.175  |
| 2     |      | 5.338     | 945899 | 99.746 |
| 3     |      | 5.725     | 748    | 0.079  |

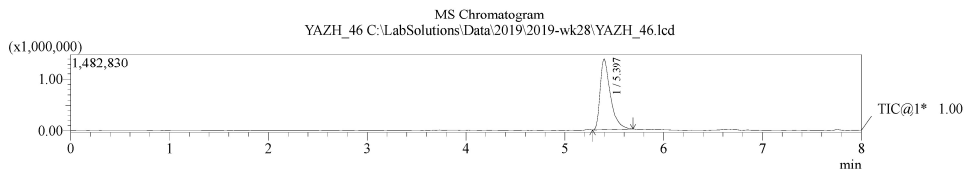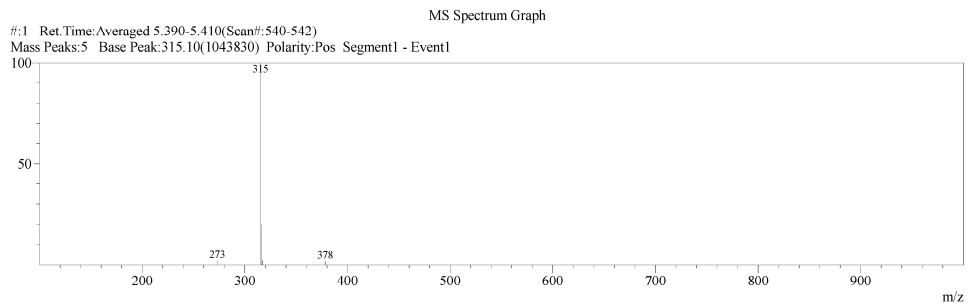

MS Spectrum Table

| # | m/z    | Abs.Inten. | Rel.Inten. | Charge | Polarity | Monoisotopic | # | m/z    | Abs.Inten. | Rel.Inten. | Charge | Polarity | Monoisotopic |
|---|--------|------------|------------|--------|----------|--------------|---|--------|------------|------------|--------|----------|--------------|
| 1 | 273.00 | 21147      | 2.03       |        |          |              | 4 | 317.15 | 21843      | 2.09       |        |          |              |
| 2 | 315.10 | 1043830    | 100.00     |        |          |              | 5 | 378.15 | 18923      | 1.81       |        |          |              |
| 3 | 316.10 | 207896     | 19.92      |        |          |              |   |        |            |            |        |          |              |

Figure S78. LCMS spectrum of compound **21c**.



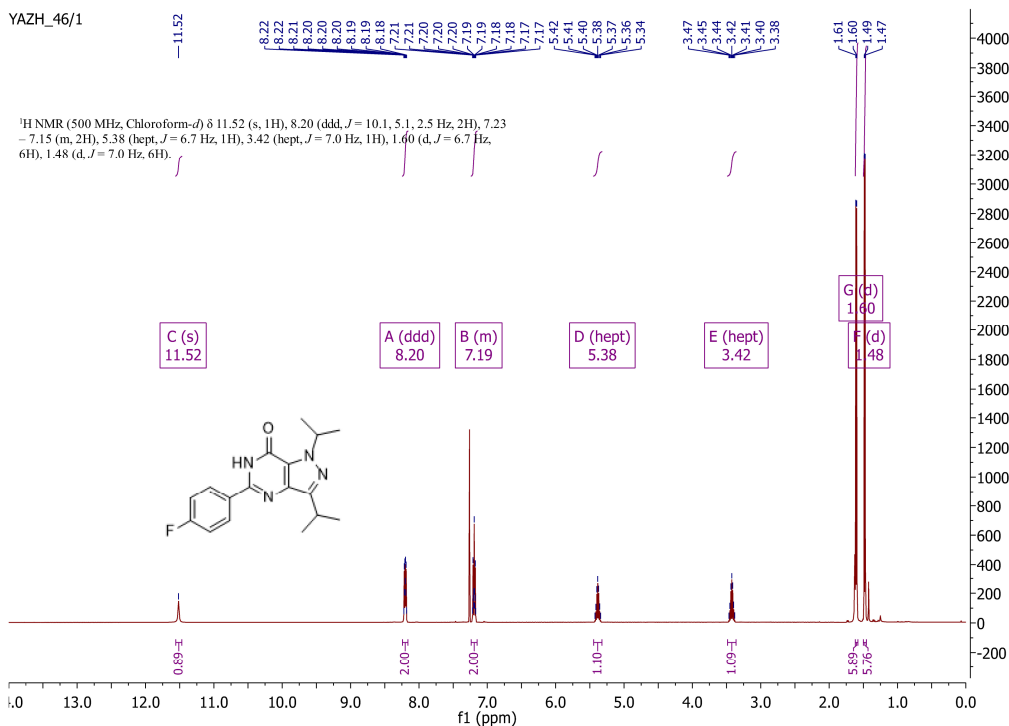

Figure S79. <sup>1</sup>H NMR spectrum of compound **21c**.

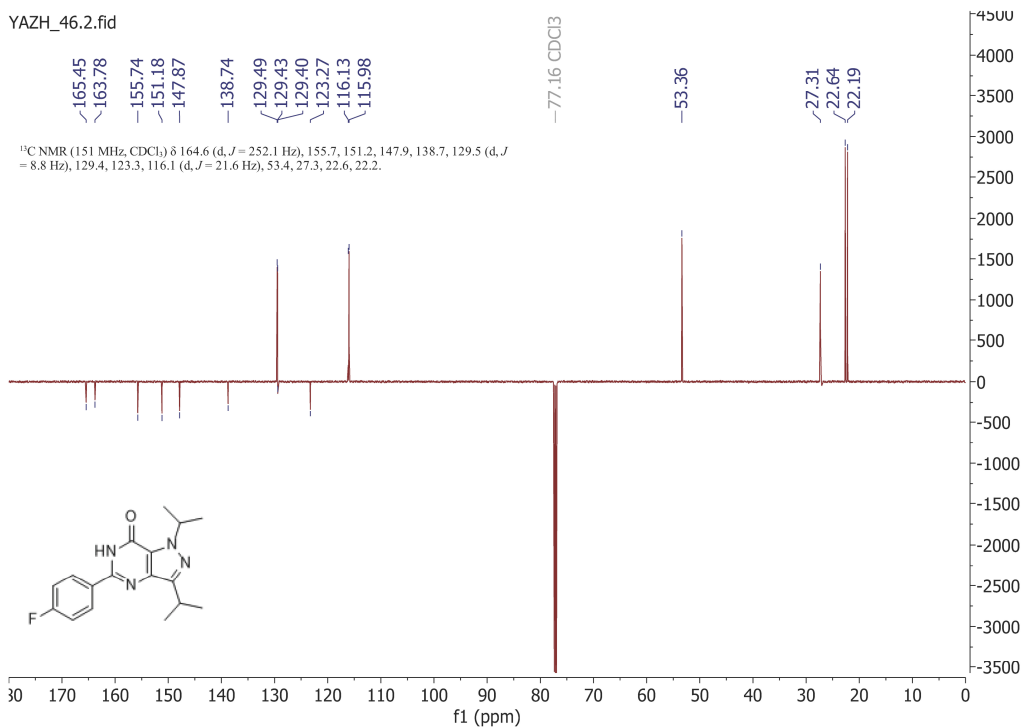

Figure S80. <sup>13</sup>C NMR spectrum of compound **21c**.

Acquired by : Admin  
 Date Acquired : 26/4/2019 12:01:34 PM  
 Sample Name : MOIB\_10\_final\_pure  
 Sample ID :  
 Tray# : 1  
 Vial# : 16  
 Injection Volume : 1  
 Data File : C:\LabSolutions\Data\2019\2019-wk17\MOIB\_10\_final\_pure.lcd  
 Background File : blanco 26042019.lcd  
 Method File : Method SCAN ACID standard.lcm  
 Report Format : DefaultL.CMS.lcr  
 Tuning File : C:\LabSolutions\Tuning\Tuning-ESI-pos-neg01072015a.lct  
 Processed by : Admin  
 Modified Date : 17/6/2019 4:58:25 PM

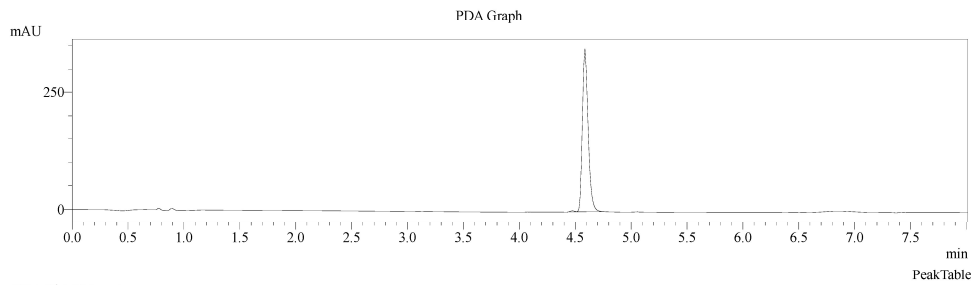

| Peak# | Name | Ret. Time | Area    | Area % |
|-------|------|-----------|---------|--------|
| 1     |      | 4.469     | 5959    | 0.482  |
| 2     |      | 4.581     | 1231102 | 99.518 |

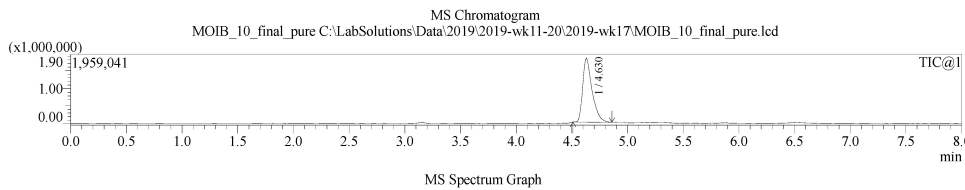

#:5 Ret.Time:Averaged 4.620-4.640(Scan#:-463-465)  
 BG Mode:Calc 4.510<->4.860(452<->487)

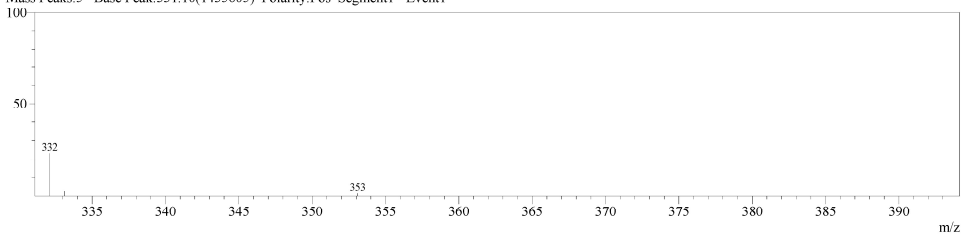

MS Spectrum Table

#:5 Ret.Time:  
 BG Mode:Calc 4.510<->4.860(452<->487)

| # | m/z    | Abs.Inten. | Rel.Inten. | Charge | Polarity | Monoisotopic | # | m/z    | Abs.Inten. | Rel.Inten. | Charge | Polarity | Monoisotopic |
|---|--------|------------|------------|--------|----------|--------------|---|--------|------------|------------|--------|----------|--------------|
| 1 | 331.10 | 1435605    | 100.00     |        |          |              | 4 | 353.10 | 20172      | 1.41       |        |          |              |
| 2 | 332.10 | 336947     | 23.47      |        |          |              | 5 | 394.15 | 17736      | 1.24       |        |          |              |
| 3 | 333.10 | 36941      | 2.57       |        |          |              |   |        |            |            |        |          |              |

Figure S81. LCMS spectrum of compound **21d**.

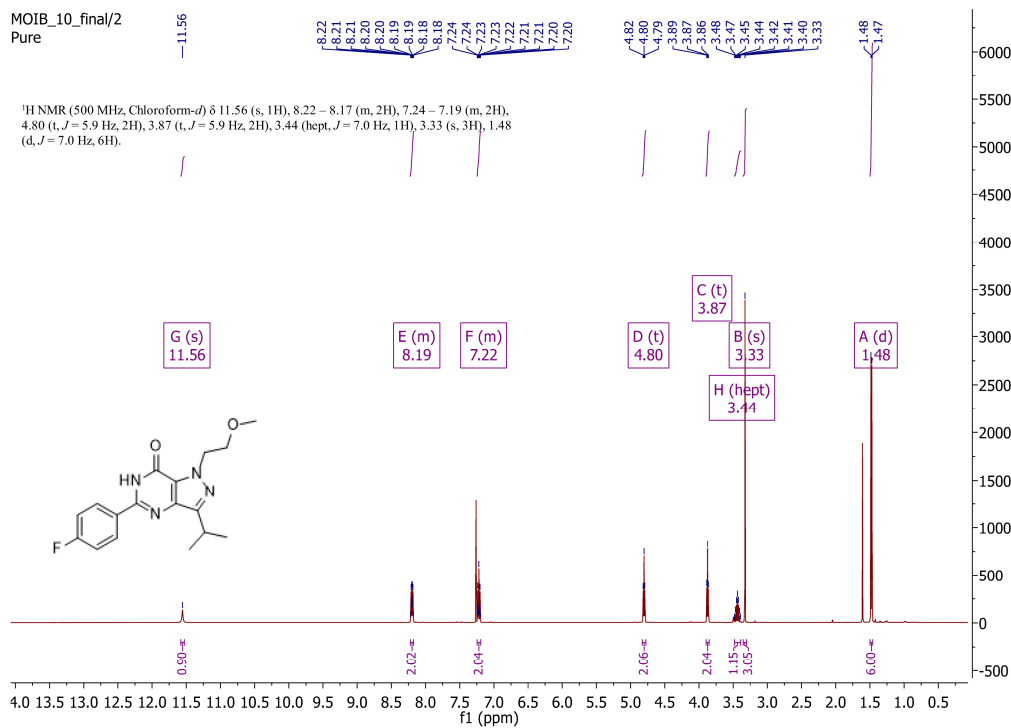

Figure S82. <sup>1</sup>H NMR spectrum of compound 21d.

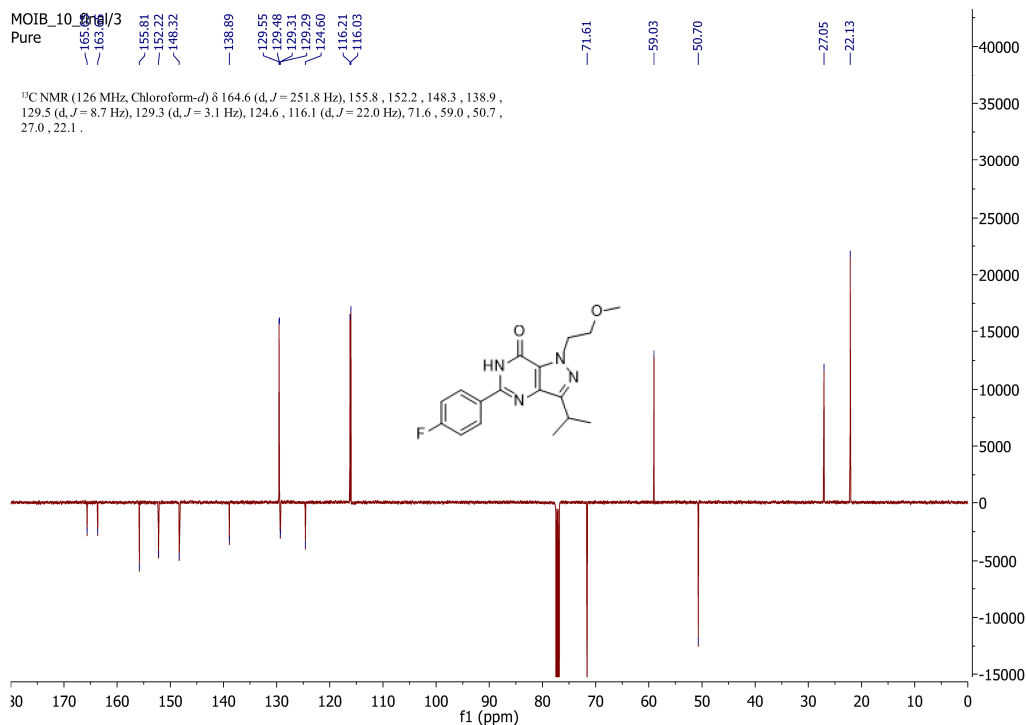

Figure S83. <sup>13</sup>C NMR spectrum of compound 21d.

Acquired by : Admin  
 Date Acquired : 7/5/2019 5:45:32 PM  
 Sample Name : MOIB\_14\_RC\_pure  
 Sample ID :  
 Tray# : 1  
 Vial# : 64  
 Injection Volume : 1  
 Data File : C:\LabSolutions\Data\2019\2019-wk19\MOIB\_14\_RC\_pure.lcd  
 Background File : blanco 07052019 lcd  
 Method File : Method SCAN.ACID standard.lcm  
 Report Format : Default1.CMS.lcr  
 Tuning File : C:\LabSolutions\Tuning\Tuning-ESI-pos-neg01072015a.lct  
 Processed by : Admin  
 Modified Date : 17/6/2019 5:01:55 PM

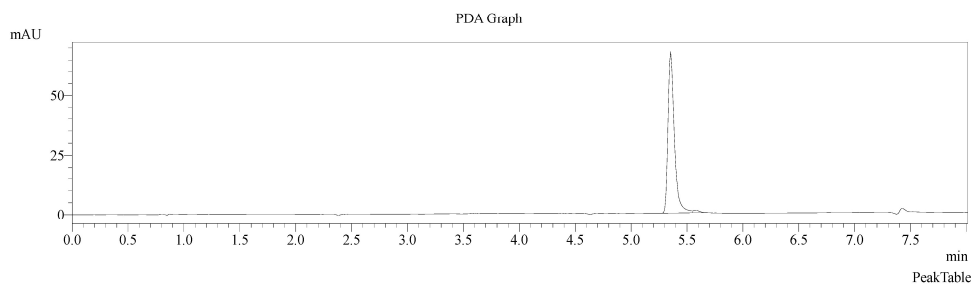

PeakTable

| Peak# | Name | Ret. Time | Area   | Area % |
|-------|------|-----------|--------|--------|
| 1     |      | 5.348     | 268843 | 98.593 |
| 2     |      | 5.574     | 3836   | 1.407  |

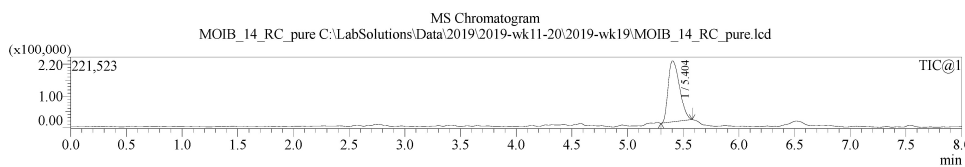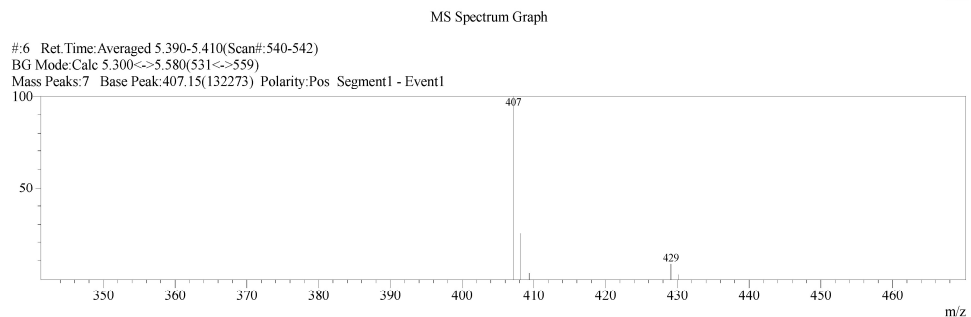

MS Spectrum Table

#6 Ret.Time:  
 BG Mode: Calc 5.300<->5.580(531<->559)  
 Mass Peaks: 7 Base Peak: 407.15(132273) Polarity: Pos Segment1 - Event1

| # | m/z    | Abs.Inten. | Rel.Inten. | Charge | Polarity | Monoisotopic | # | m/z    | Abs.Inten. | Rel.Inten. | Charge | Polarity | Monoisotopic |
|---|--------|------------|------------|--------|----------|--------------|---|--------|------------|------------|--------|----------|--------------|
| 1 | 341.30 | 1343       | 1.02       |        |          |              | 5 | 429.10 | 11031      | 8.34       |        |          |              |
| 2 | 407.15 | 132273     | 100.00     |        |          |              | 6 | 430.20 | 3538       | 2.67       |        |          |              |
| 3 | 408.15 | 33503      | 25.33      |        |          |              | 7 | 470.20 | 3787       | 2.86       |        |          |              |
| 4 | 409.35 | 4694       | 3.55       |        |          |              |   |        |            |            |        |          |              |

Figure S84. LCMS spectrum of compound **21e**.

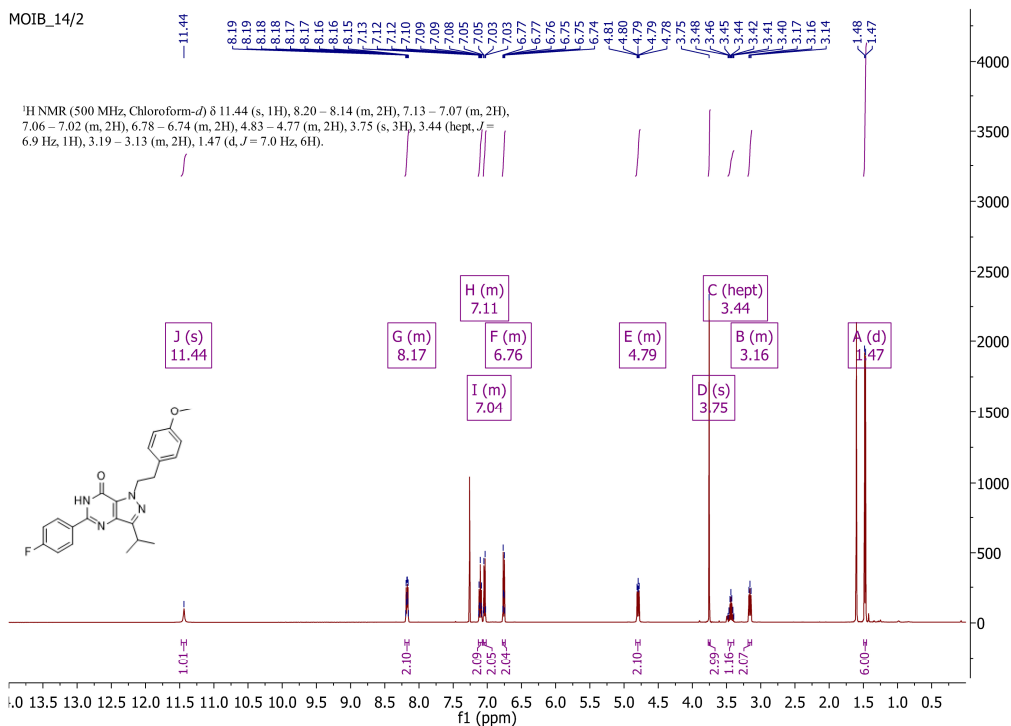

Figure S85.  $^1\text{H}$  NMR spectrum of compound **21e**.

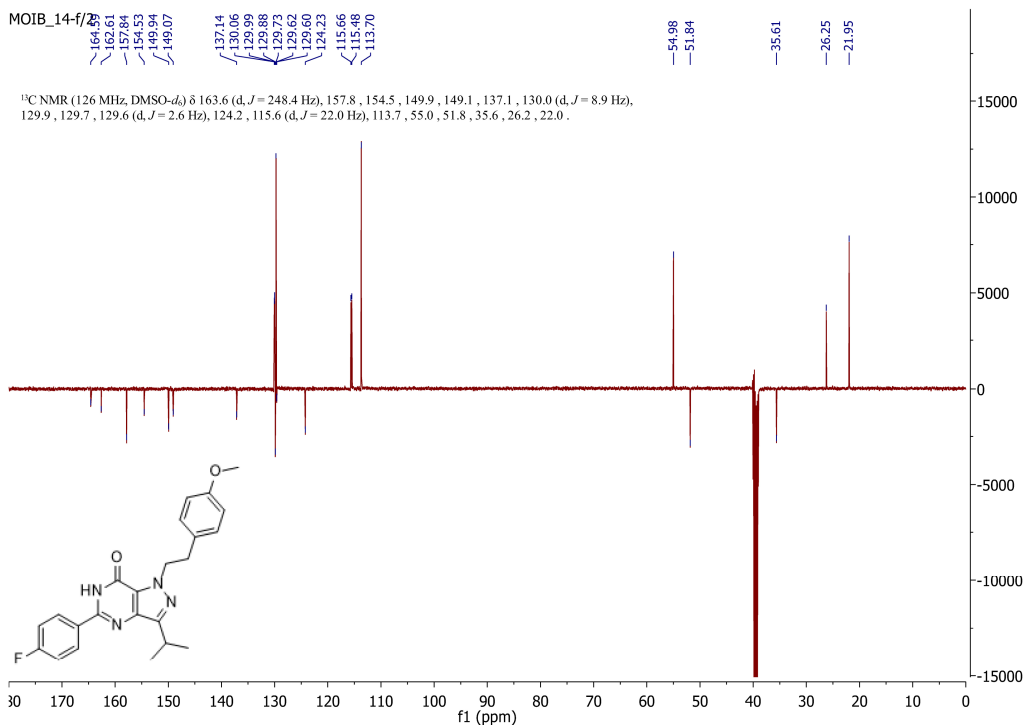

Figure S86.  $^{13}\text{C}$  NMR spectrum of compound **21e**.

Acquired by : Admin  
 Date Acquired : 10/7/2019 5:27:37 PM  
 Sample Name : MOIB\_33\_rc  
 Sample ID :  
 Tray# : 1  
 Vial# : 51  
 Injection Volume : 1  
 Data File : C:\LabSolutions\Data\2019\2019-wk28\MOIB\_33\_rc.lcd  
 Background File : blanco10072019.lcd  
 Method File : Method SCAN ACID standard.lcm  
 Report Format : Default.LCMS.lcr  
 Tuning File : C:\LabSolutions\Tuning\Tuning-ESI-pos-neg01072015a.lct  
 Processed by : Admin  
 Modified Date : 11/7/2019 2:39:12 PM

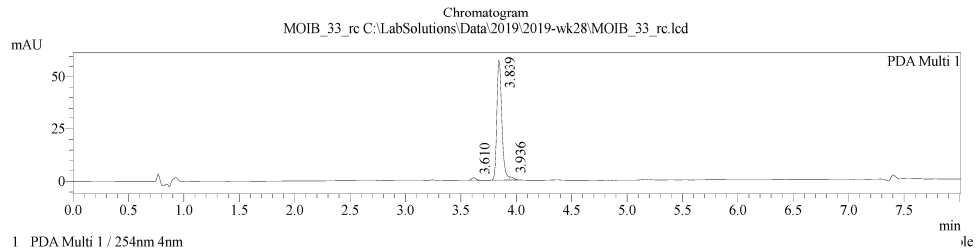

| Peak# | Name | Ret. Time | Area   | Area % |
|-------|------|-----------|--------|--------|
| 1     |      | 3.610     | 3354   | 1.806  |
| 2     |      | 3.839     | 178768 | 96.262 |
| 3     |      | 3.936     | 3589   | 1.932  |

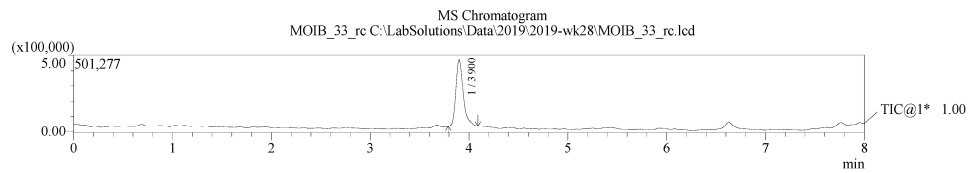

#2 Ret. Time: Averaged 3.890-3.910(Scan#:390-392)  
Mass Peaks:22 Base Peak:344.05(236385) Polarity:Pos Segment1 - Event1

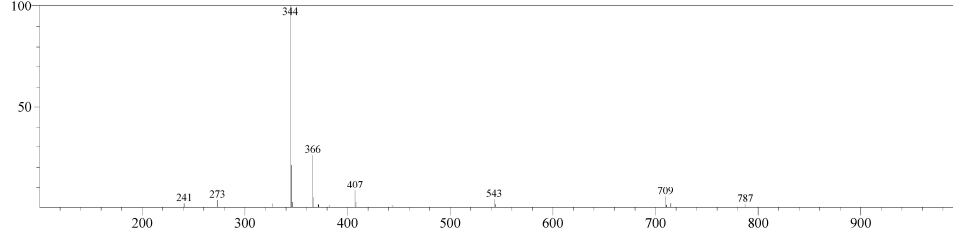

#2 Ret. Time:  
BG Mode:Calc 3.790<->4.090(380<->410)

| #  | m/z    | Abs.Inten. | Rel.Inten. | Charge | Polarity | Monoisotopic | #  | m/z    | Abs.Inten. | Rel.Inten. | Charge | Polarity | Monoisotopic |
|----|--------|------------|------------|--------|----------|--------------|----|--------|------------|------------|--------|----------|--------------|
| 1  | 240.80 | 4303       | 1.82       |        |          |              | 12 | 407.15 | 20315      | 8.59       |        |          |              |
| 2  | 273.05 | 8266       | 3.50       |        |          |              | 13 | 408.15 | 6037       | 2.55       |        |          |              |
| 3  | 327.05 | 4572       | 1.93       |        |          |              | 14 | 444.10 | 2386       | 1.01       |        |          |              |
| 4  | 344.05 | 236385     | 100.00     |        |          |              | 15 | 542.75 | 9356       | 3.96       |        |          |              |
| 5  | 345.15 | 50190      | 21.23      |        |          |              | 16 | 543.75 | 3479       | 1.47       |        |          |              |
| 6  | 346.15 | 6162       | 2.61       |        |          |              | 17 | 709.35 | 12682      | 5.36       |        |          |              |
| 7  | 366.10 | 61037      | 25.82      |        |          |              | 18 | 710.35 | 2952       | 1.25       |        |          |              |
| 8  | 367.05 | 11640      | 4.92       |        |          |              | 19 | 710.65 | 2410       | 1.02       |        |          |              |
| 9  | 371.30 | 3347       | 1.42       |        |          |              | 20 | 714.30 | 4332       | 1.83       |        |          |              |
| 10 | 371.80 | 3246       | 1.37       |        |          |              | 21 | 714.95 | 5069       | 2.14       |        |          |              |
| 11 | 382.15 | 2841       | 1.20       |        |          |              | 22 | 787.25 | 3681       | 1.56       |        |          |              |

Figure S87. LCMS spectrum of compound 21f.

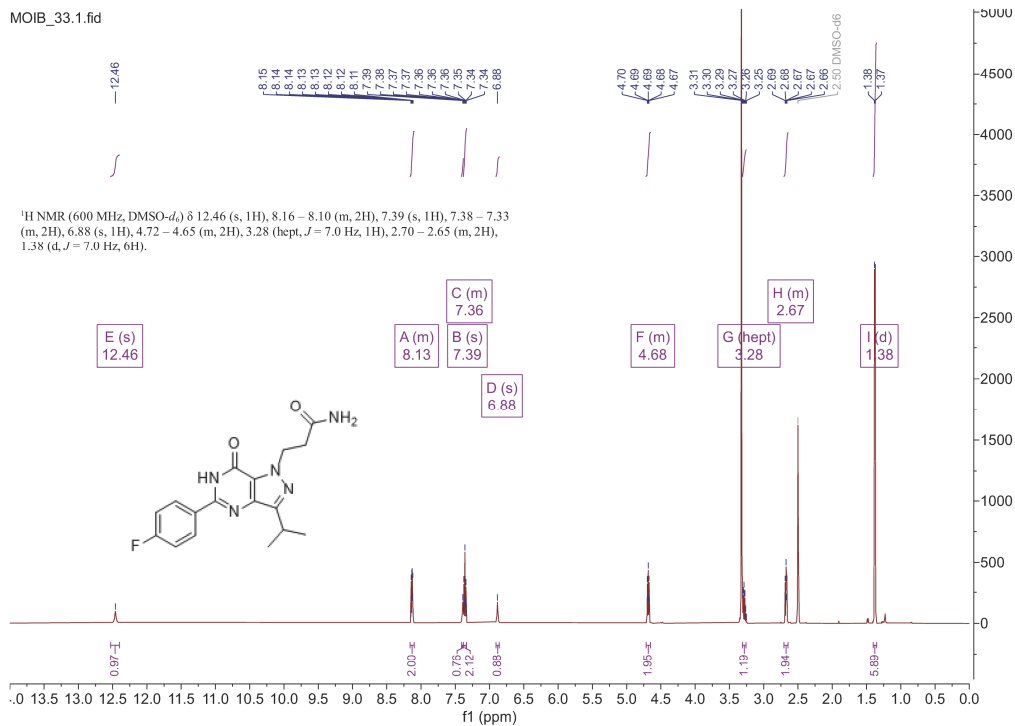

Figure S88. <sup>1</sup>H NMR spectrum of compound **21f**.

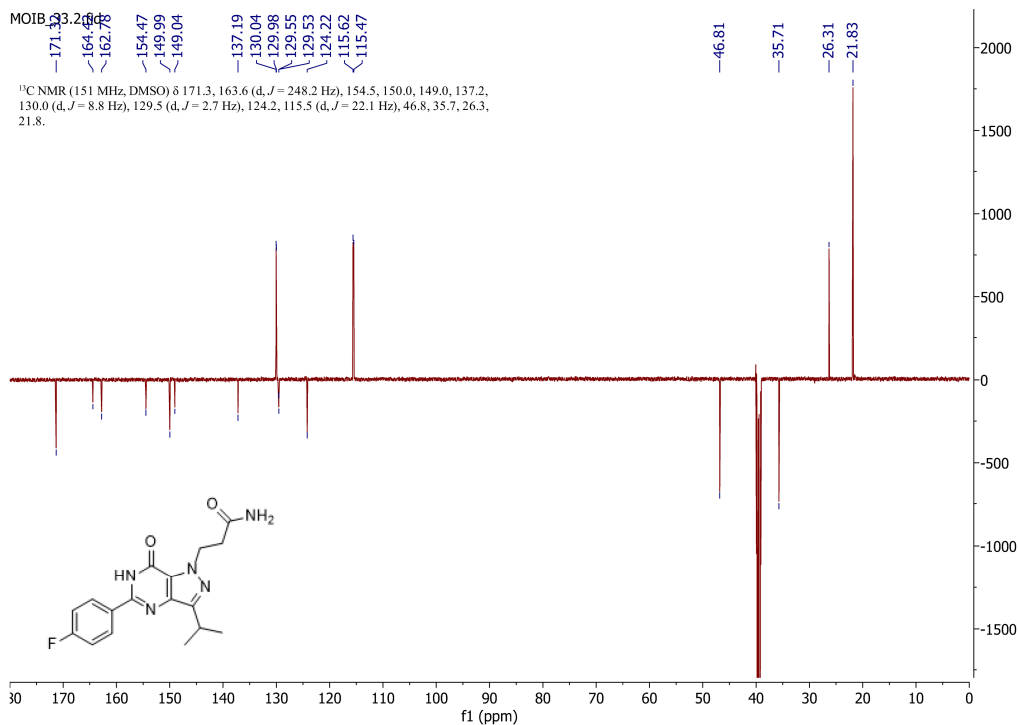

Figure S89. <sup>13</sup>C NMR spectrum of compound **21f**.

Acquired by : Admin  
 Date Acquired : 11/7/2019 11:19:41 AM  
 Sample Name : MOIB\_36\_final  
 Sample ID :  
 Tray# : 1  
 Vial# : 12  
 Injection Volume : 3  
 Data File : C:\LabSolutions\Data\2019\2019-wk28\MOIB\_36\_final.lcd  
 Background File : blanco 11072019.lcd  
 Method File : Method SCAN ACID standard.lcm  
 Report Format : DefaultL.CMS.lcr  
 Tuning File : C:\LabSolutions\Tuning\Tuning-ESI-pos-neg01072015a.lct  
 Processed by : Admin  
 Modified Date : 31/3/2021 10:51:15 AM

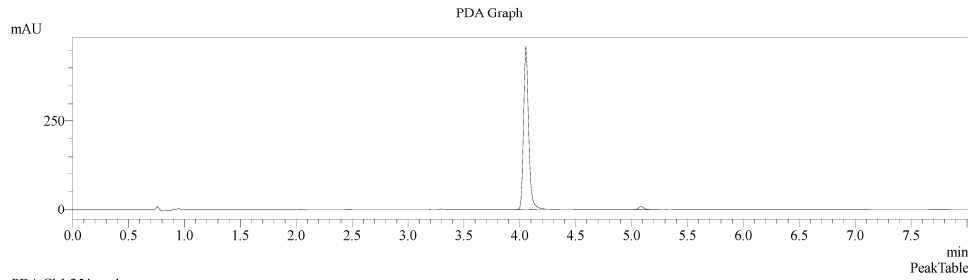

PDA Ch1 254nm 4nm

| Peak# | Name | Ret. Time | Area    | Area % |
|-------|------|-----------|---------|--------|
| 1     |      | 4.048     | 1436731 | 97.987 |
| 2     |      | 5.080     | 29518   | 2.013  |

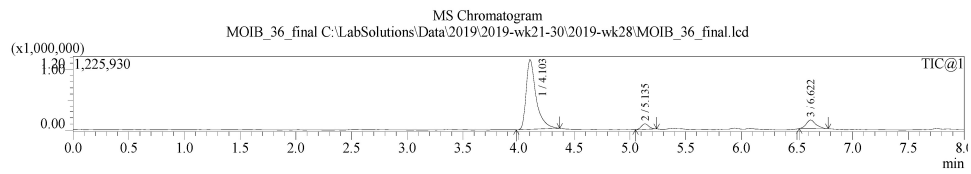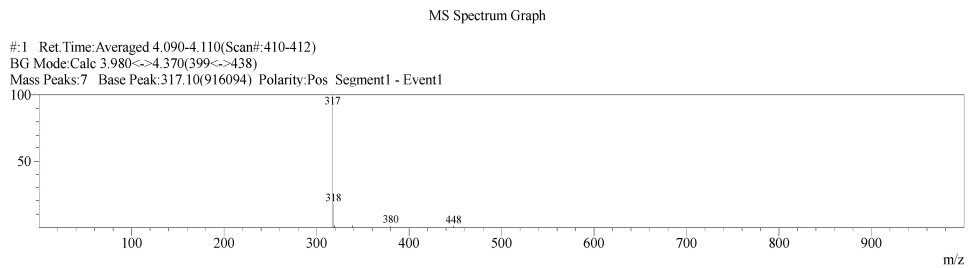

MS Spectrum Table

#1 Ret. Time:  
 BG Mode Calc 3.980<->4.370 (399<->438)  
 Mass Peaks: 7 Base Peak: 317.10 (916094) Polarity: Pos Segment1 - Event1

| # | m/z    | Abs.Inten. | Rel.Inten. | Charge | Polarity | Monoisotopic | # | m/z    | Abs.Inten. | Rel.Inten. | Charge | Polarity | Monoisotopic |
|---|--------|------------|------------|--------|----------|--------------|---|--------|------------|------------|--------|----------|--------------|
| 1 | 317.10 | 916094     | 100.00     |        |          |              | 5 | 380.20 | 17058      | 1.86       |        |          |              |
| 2 | 318.10 | 162880     | 17.78      |        |          |              | 6 | 448.00 | 13229      | 1.44       |        |          |              |
| 3 | 319.05 | 17836      | 1.95       |        |          |              | 7 | 458.00 | 9755       | 1.06       |        |          |              |
| 4 | 339.10 | 16003      | 1.75       |        |          |              |   |        |            |            |        |          |              |

Figure S90. LCMS spectrum of compound 22.



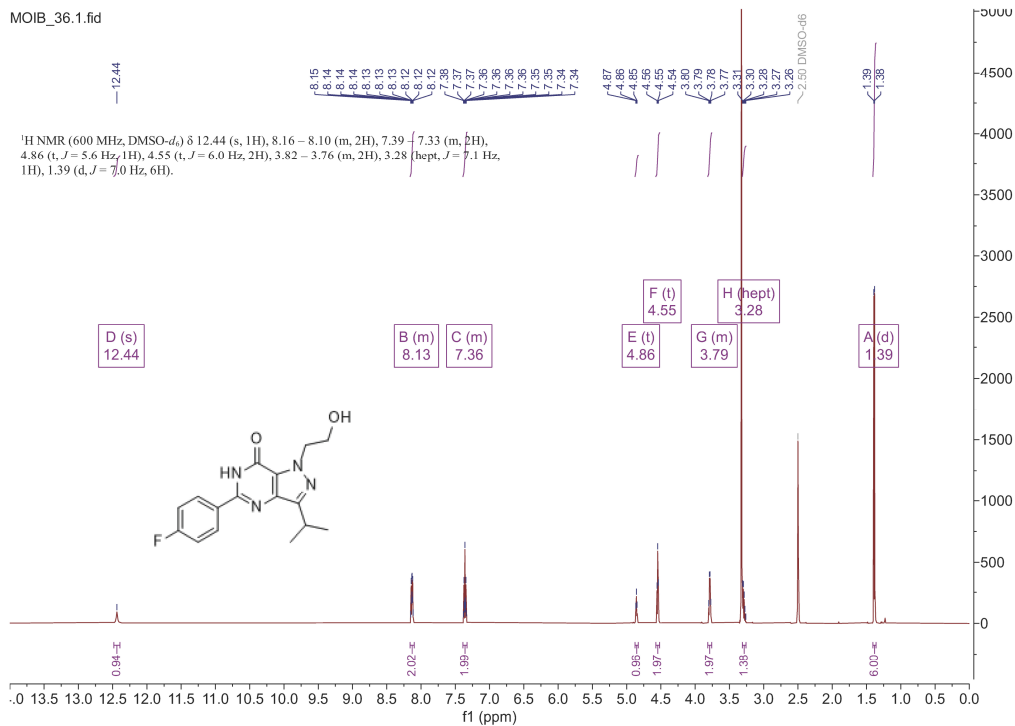

Figure S91. <sup>1</sup>H NMR spectrum of compound 22.

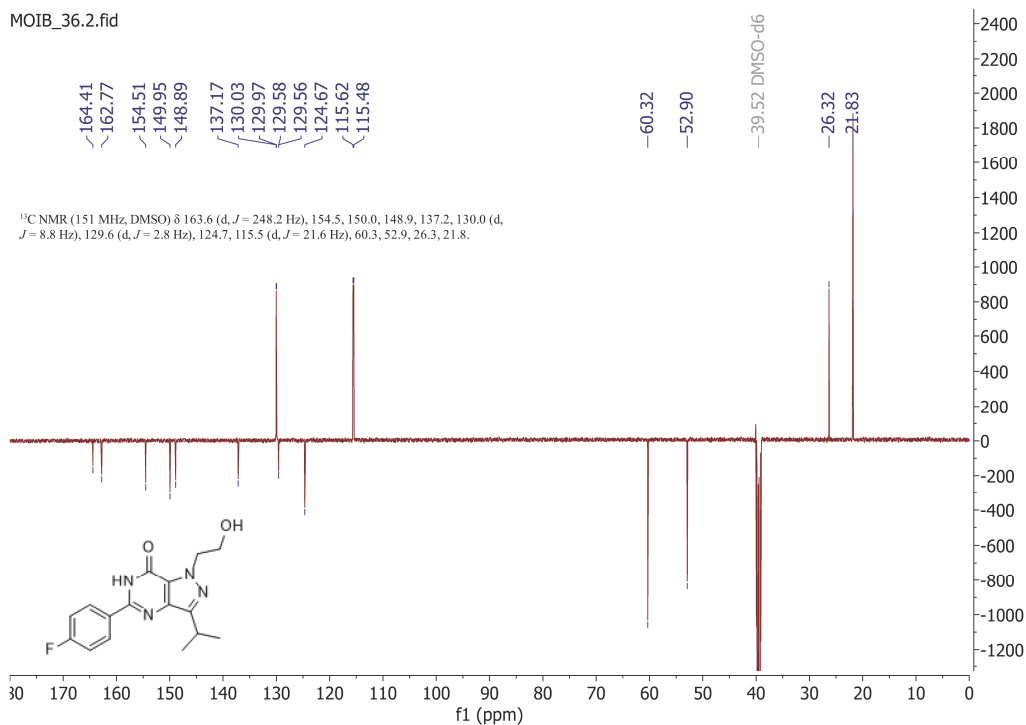

Figure S92. <sup>13</sup>C NMR spectrum of compound 22.

Acquired by : Admin  
 Date Acquired : 29/5/2019 12:37:27 PM  
 Sample Name : MOIB\_18\_pure  
 Sample ID :  
 Tray# : 1  
 Vial# : 21  
 Injection Volume : 1  
 Data File : C:\LabSolutions\Data\2019\2019-wk22\MOIB\_18\_pure.lcd  
 Background File : blanco 29052019.lcd  
 Method File : Method SCAN ACID standard.lcm  
 Report Format : DefaultL.CMS.lcr  
 Tuning File : C:\LabSolutions\Tuning\Tuning-ESI-pos-neg01072015a.lct  
 Processed by : Admin  
 Modified Date : 29/5/2019 1:03:53 PM

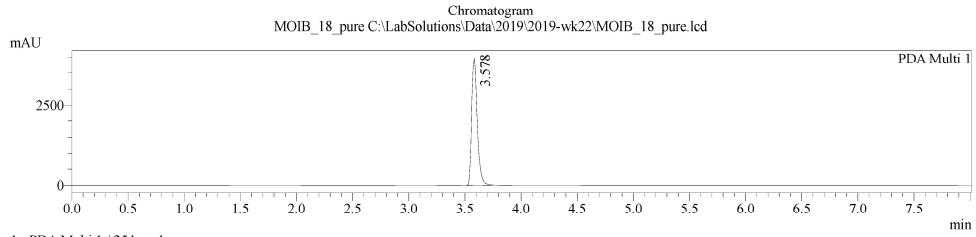

PeakTabl

| Peak# | Name | Ret. Time | Area     | Area %  |
|-------|------|-----------|----------|---------|
| 1     |      | 3.578     | 13616793 | 100.000 |

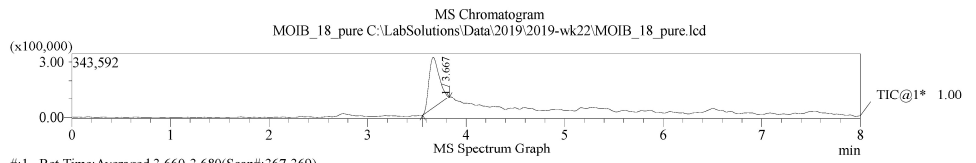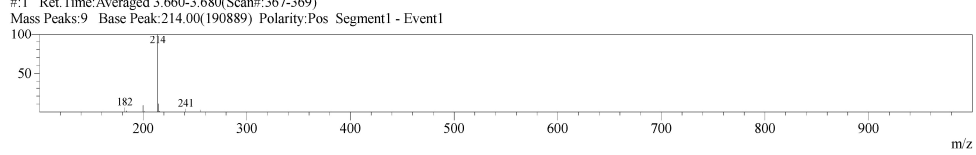

MS Spectrum Table

#1 RetTime:  
BG Mode:Calc 3.560<->3.830(357<->384)  
Polarity:Pos Segment1 - Event1

| # | m/z    | Abs.Inten. | Rel.Inten. | Charge | Polarity | Monoisotopic | # | m/z    | Abs.Inten. | Rel.Inten. | Charge | Polarity | Monoisotopic |
|---|--------|------------|------------|--------|----------|--------------|---|--------|------------|------------|--------|----------|--------------|
| 1 | 181.95 | 10119      | 5.30       |        |          |              | 6 | 215.00 | 19639      | 10.29      |        |          |              |
| 2 | 184.10 | 2766       | 1.45       |        |          |              | 7 | 215.90 | 2171       | 1.14       |        |          |              |
| 3 | 199.95 | 16007      | 8.39       |        |          |              | 8 | 241.00 | 6945       | 3.64       |        |          |              |
| 4 | 201.15 | 2044       | 1.07       |        |          |              | 9 | 255.15 | 4946       | 2.59       |        |          |              |
| 5 | 214.00 | 190889     | 100.00     |        |          |              |   |        |            |            |        |          |              |

Figure S93. LCMS spectrum of compound **23**.

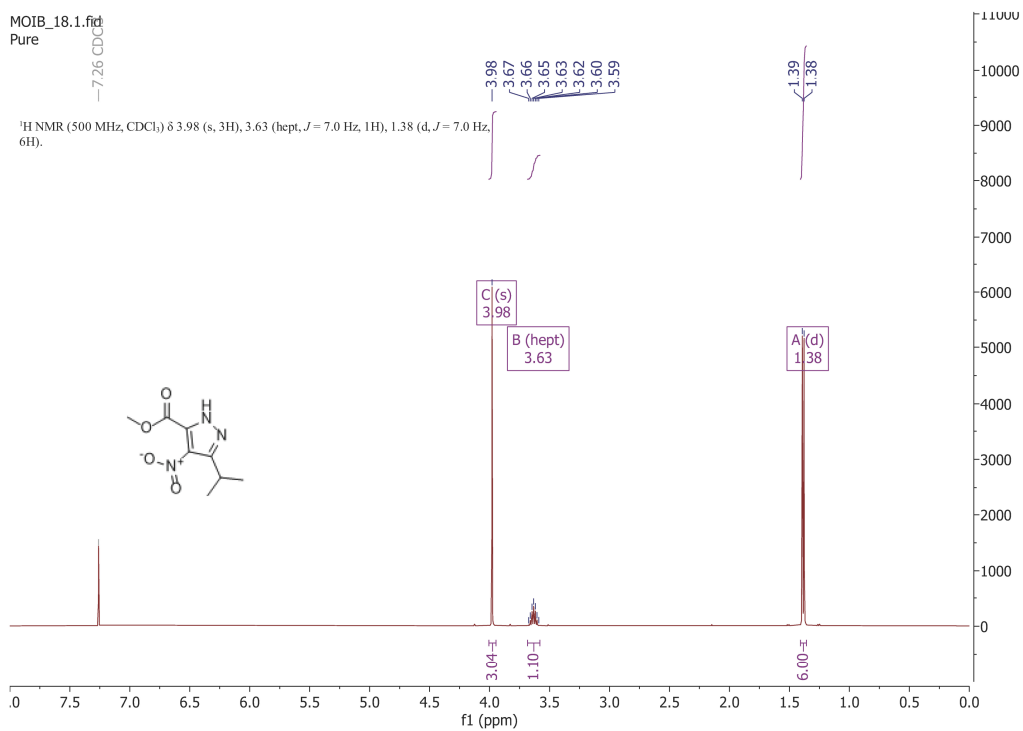

Figure S94. <sup>1</sup>H NMR spectrum of compound **23**.

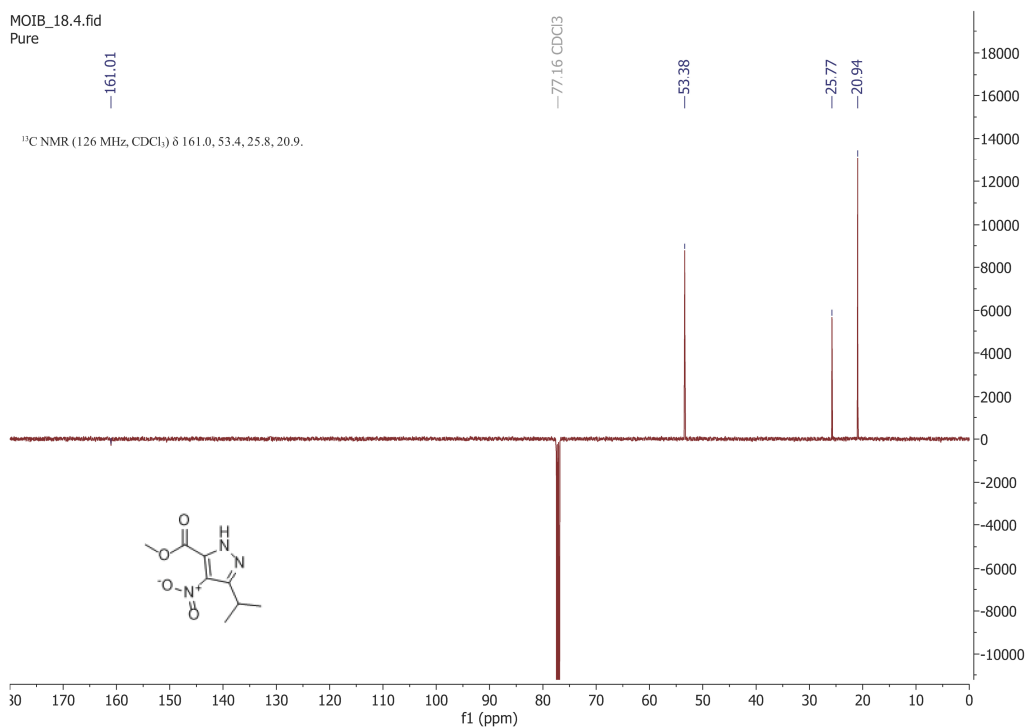

Figure S95. <sup>13</sup>C NMR spectrum of compound **23**.

Acquired by : Admin  
 Date Acquired : 16/7/2018 10:51:14 AM  
 Sample Name : LABA-022  
 Sample ID :  
 Tray# : 1  
 Vial# : 9  
 Injection Volume : 1  
 Data File : C:\LabSolutions\Data\2018\2018-wk29\LABA-022.lcd  
 Background File : blanco 16072018.lcd  
 Method File : Method SCAN ACID standard neg.lcm  
 Report Format : Default.LCMS.lcr  
 Tuning File : C:\LabSolutions\Tuning\Tuning-ESI-pos-neg01072015a.lct  
 Processed by : Admin  
 Modified Date : 16/7/2018 11:08:48 AM

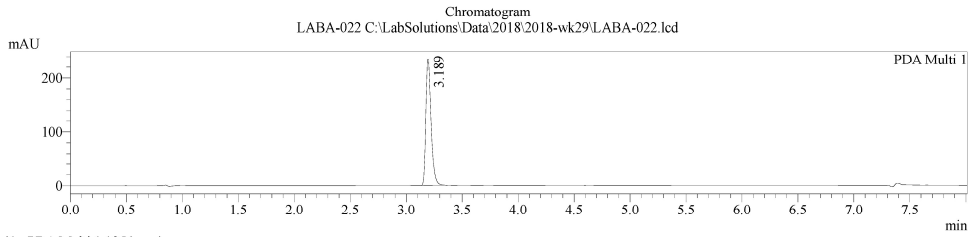

| Peak# | Name | Ret. Time | Area   | Area %  |
|-------|------|-----------|--------|---------|
| 1     |      | 3.189     | 765106 | 100.000 |

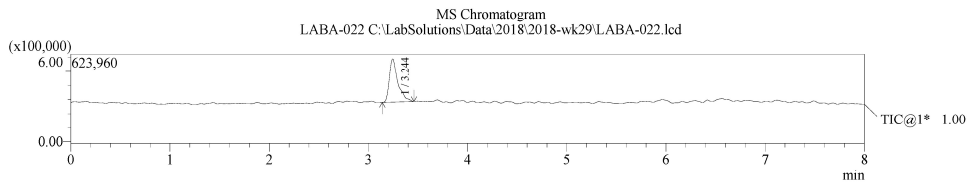

#1 Ret.Time: Averaged 3.230-3.250(Scan#: 324-326)

Mass Peaks:24 Base Peak:179.00(141779) Polarity:Neg Segment1 - Event1

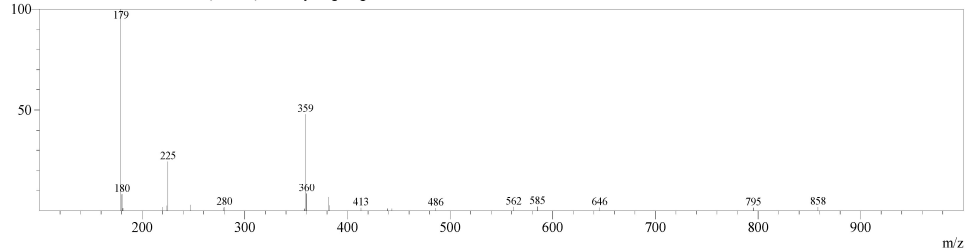

MS Spectrum Table

#1 Ret.Time:

BG Mode:Calc 3.140<->3.460(315<->347)

Mass Peaks:24 Base Peak:179.00(141779) Polarity:Neg Segment1 - Event1

| #  | m/z    | Abs.Inten. | Rel.Inten. | Charge | Polarity | Monoisotopic | #  | m/z     | Abs.Inten. | Rel.Inten. | Charge | Polarity | Monoisotopic |
|----|--------|------------|------------|--------|----------|--------------|----|---------|------------|------------|--------|----------|--------------|
| 1  | 179.00 | 141779     | 100.00     |        |          |              | 13 | 381.25  | 9413       | 6.64       |        |          |              |
| 2  | 180.25 | 11417      | 8.05       |        |          |              | 14 | 382.20  | 3611       | 2.55       |        |          |              |
| 3  | 181.20 | 1755       | 1.24       |        |          |              | 15 | 413.10  | 2066       | 1.46       |        |          |              |
| 4  | 220.15 | 2520       | 1.78       |        |          |              | 16 | 439.15  | 1523       | 1.07       |        |          |              |
| 5  | 224.15 | 3579       | 2.52       |        |          |              | 17 | 443.25  | 1420       | 1.00       |        |          |              |
| 6  | 225.05 | 34564      | 24.38      |        |          |              | 18 | 486.00  | 1824       | 1.29       |        |          |              |
| 7  | 247.05 | 4057       | 2.86       |        |          |              | 19 | 561.95  | 2607       | 1.84       |        |          |              |
| 8  | 279.10 | 2230       | 1.57       |        |          |              | 20 | 585.05  | 2845       | 2.01       |        |          |              |
| 9  | 280.00 | 2476       | 1.75       |        |          |              | 21 | 645.70  | 2233       | 1.57       |        |          |              |
| 10 | 358.10 | 1454       | 1.03       |        |          |              | 22 | 795.40  | 2152       | 1.52       |        |          |              |
| 11 | 359.15 | 67854      | 47.86      |        |          |              | 23 | 858.30  | 2564       | 1.81       |        |          |              |
| 12 | 360.15 | 11941      | 8.42       |        |          |              | 24 | 1051.00 | 2181       | 1.54       |        |          |              |

Figure S96. LCMS spectrum of compound 27a.

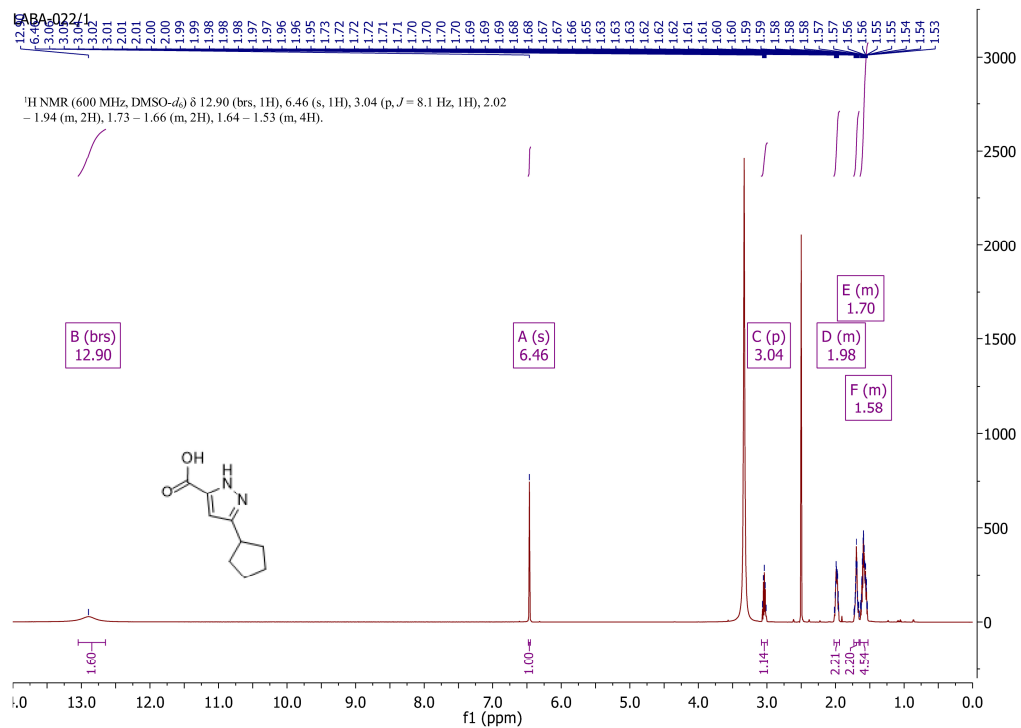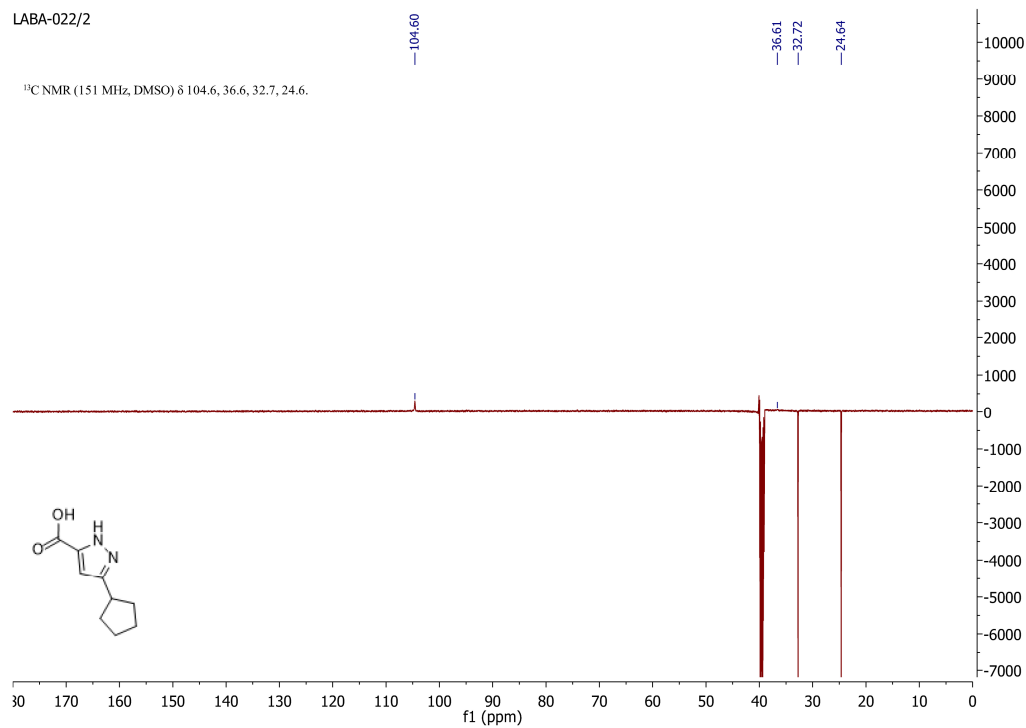

Acquired by : Admin  
 Date Acquired : 23/10/2018 2:30:32 PM  
 Sample Name : ODVI01\_018 crude 231018  
 Sample ID :  
 Tray# : 1  
 Vial# : 17  
 Injection Volume : 1  
 Data File : C:\LabSolutions\Data\2018\2018-wk43\ODVI01\_018 crude 231018.lcd  
 Background File : 23102018 blanco.lcd  
 Method File : Method SCAN ACID standard.lcm  
 Report Format : DefaultL.CMS.lcr  
 Tuning File : C:\LabSolutions\Tuning\Tuning-ESI-pos-neg01072015a.lct  
 Processed by : Admin  
 Modified Date : 23/10/2018 2:40:02 PM

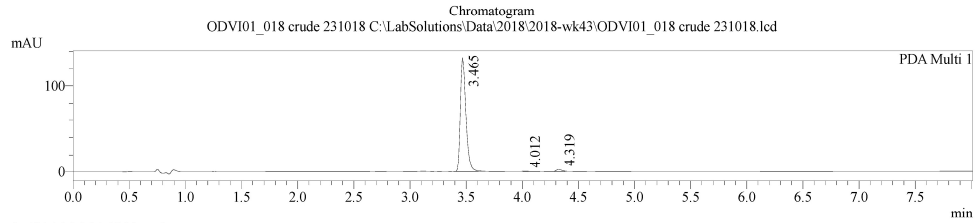

| Peak# | Name | Ret. Time | Area   | Area % |
|-------|------|-----------|--------|--------|
| 1     |      | 3.465     | 452342 | 97.867 |
| 2     |      | 4.012     | 1072   | 0.232  |
| 3     |      | 4.319     | 8786   | 1.901  |

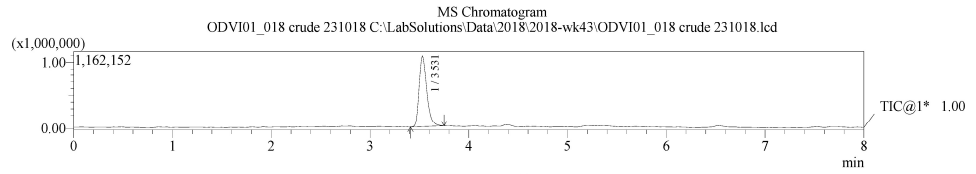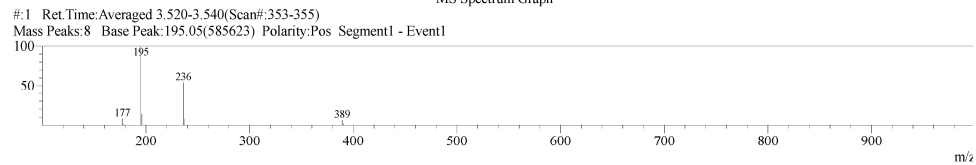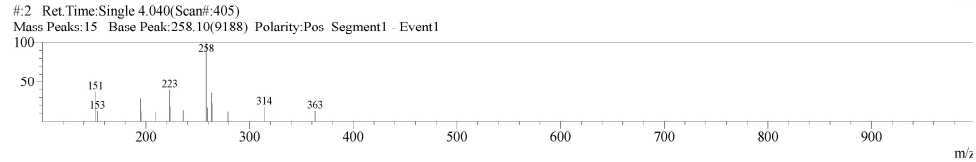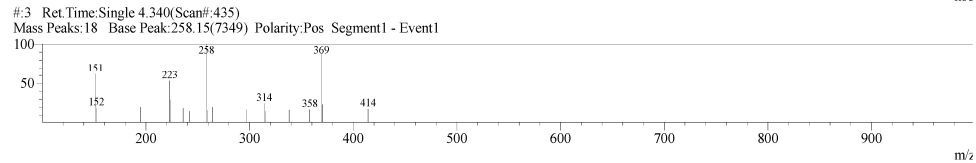

MS Spectrum Table

| # | m/z    | Abs.Inten. | Rel.Inten. | Charge | Polarity | Monoisotopic | # | m/z    | Abs.Inten. | Rel.Inten. | Charge | Polarity | Monoisotopic |
|---|--------|------------|------------|--------|----------|--------------|---|--------|------------|------------|--------|----------|--------------|
| 1 | 177.05 | 47070      | 8.04       |        |          |              | 5 | 236.05 | 317612     | 54.23      |        |          |              |
| 2 | 178.05 | 6493       | 1.11       |        |          |              | 6 | 237.10 | 42704      | 7.29       |        |          |              |
| 3 | 195.05 | 585623     | 100.00     |        |          |              | 7 | 389.25 | 35464      | 6.06       |        |          |              |
| 4 | 196.05 | 79866      | 13.64      |        |          |              | 8 | 390.30 | 8125       | 1.39       |        |          |              |

Figure S99. LCMS spectrum of compound **27b**.

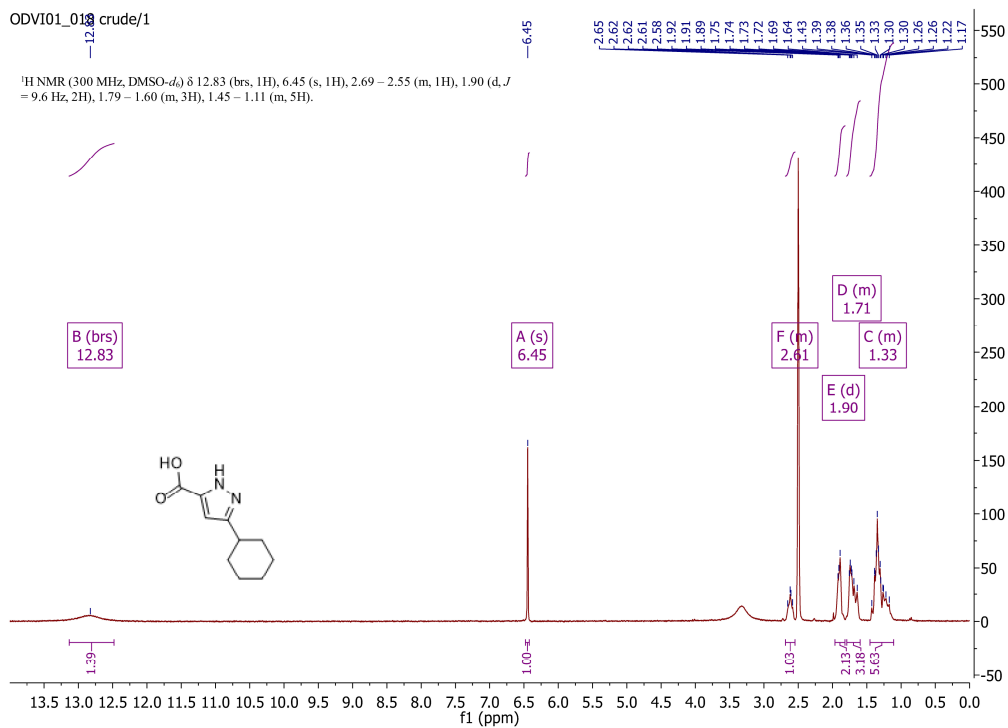

Figure S100. <sup>1</sup>H NMR spectrum of compound **27b**.

Acquired by : Admin  
 Date Acquired : 24/7/2018 10:42:48 AM  
 Sample Name : LABA-026-CRUDE-PR  
 Sample ID :  
 Tray# : 1  
 Vial# : 15  
 Injection Volume : 1  
 Data File : C:\LabSolutions\Data\2018\2018-wk30\LABA-026-CRUDE-PR.lcd  
 Background File : blanco 24072018.lcd  
 Method File : Method SCAN ACID standard neg.lcm  
 Report Format : DefaultL.CMS.lcr  
 Tuning File : C:\LabSolutions\Tuning\Tuning-ESI-pos-neg01072015a.lct  
 Processed by : Admin  
 Modified Date : 24/7/2018 12:11:18 PM

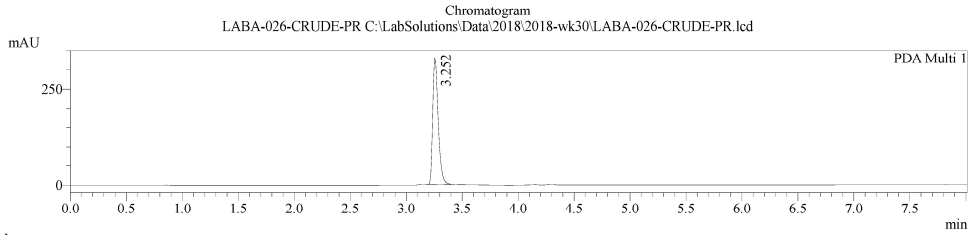

11 PDA Multi 1 / 254nm 4nm

| Peak# | Name | Ret. Time | Area    | Area %  |
|-------|------|-----------|---------|---------|
| 1     |      | 3.252     | 1116635 | 100.000 |

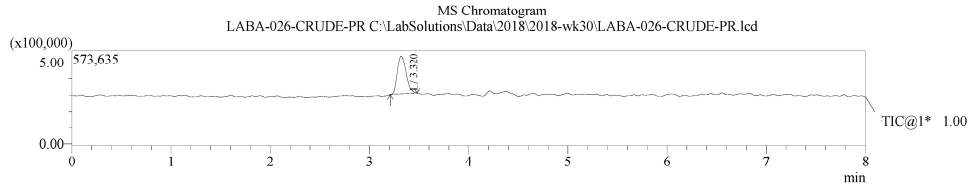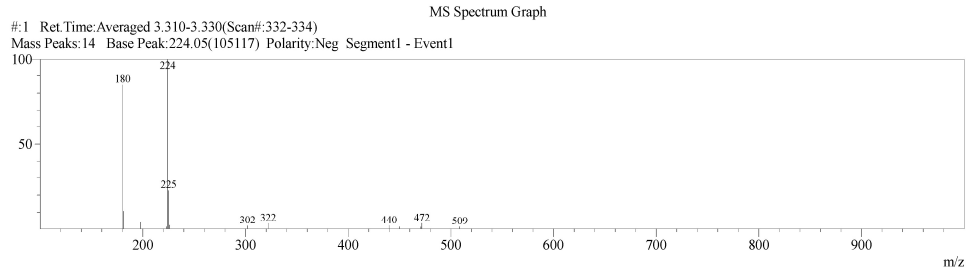

MS Spectrum Table  
#1 Ret. Time:  
BG Mode:Calc 3.210<->3.480(322<->349)  
Mass Peaks:14 Base Peak:224.05(105117) Polarity:Neg Segment1 - Event1

| # | m/z    | Abs.Inten. | Rel.Inten. | Charge | Polarity | Monoisotopic | #  | m/z    | Abs.Inten. | Rel.Inten. | Charge | Polarity | Monoisotopic |
|---|--------|------------|------------|--------|----------|--------------|----|--------|------------|------------|--------|----------|--------------|
| 1 | 180.05 | 89072      | 84.74      |        |          |              | 8  | 301.85 | 1934       | 1.84       |        |          |              |
| 2 | 181.05 | 11197      | 10.65      |        |          |              | 9  | 321.95 | 3422       | 3.26       |        |          |              |
| 3 | 197.95 | 3988       | 3.79       |        |          |              | 10 | 439.75 | 1971       | 1.88       |        |          |              |
| 4 | 223.10 | 1357       | 1.29       |        |          |              | 11 | 449.70 | 1347       | 1.28       |        |          |              |
| 5 | 224.05 | 105117     | 100.00     |        |          |              | 12 | 470.70 | 1270       | 1.21       |        |          |              |
| 6 | 225.05 | 23822      | 22.66      |        |          |              | 13 | 471.70 | 3498       | 3.33       |        |          |              |
| 7 | 225.95 | 2303       | 2.19       |        |          |              | 14 | 508.60 | 1327       | 1.26       |        |          |              |

Figure S101. LCMS spectrum of compound **28a**.



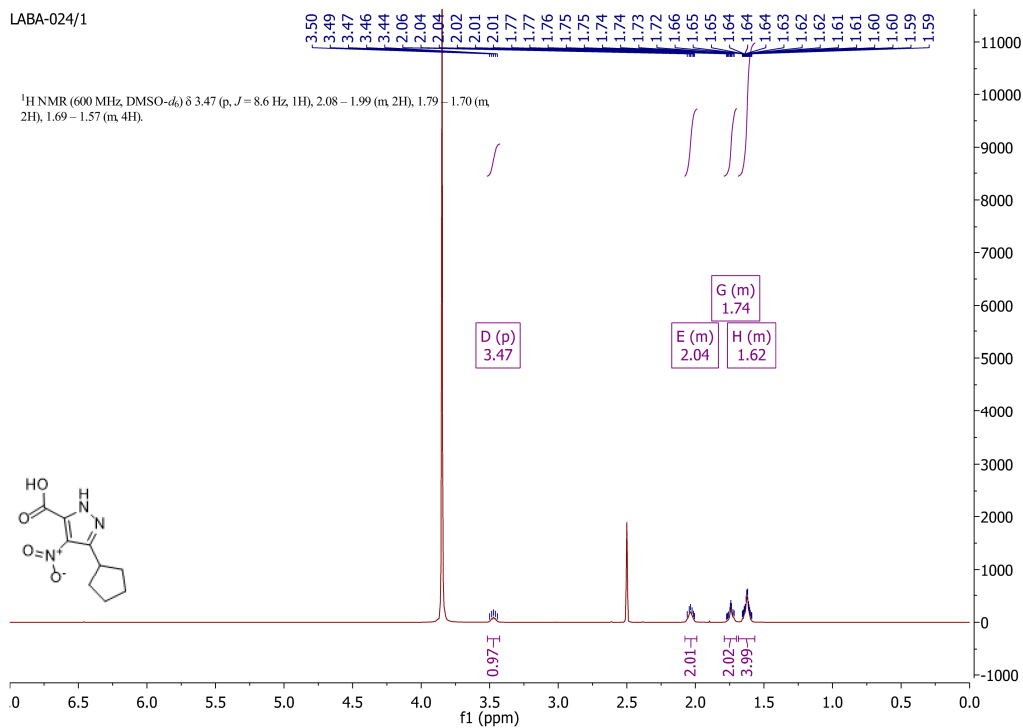

Figure S102.  $^1\text{H}$  NMR spectrum of compound **28a**.

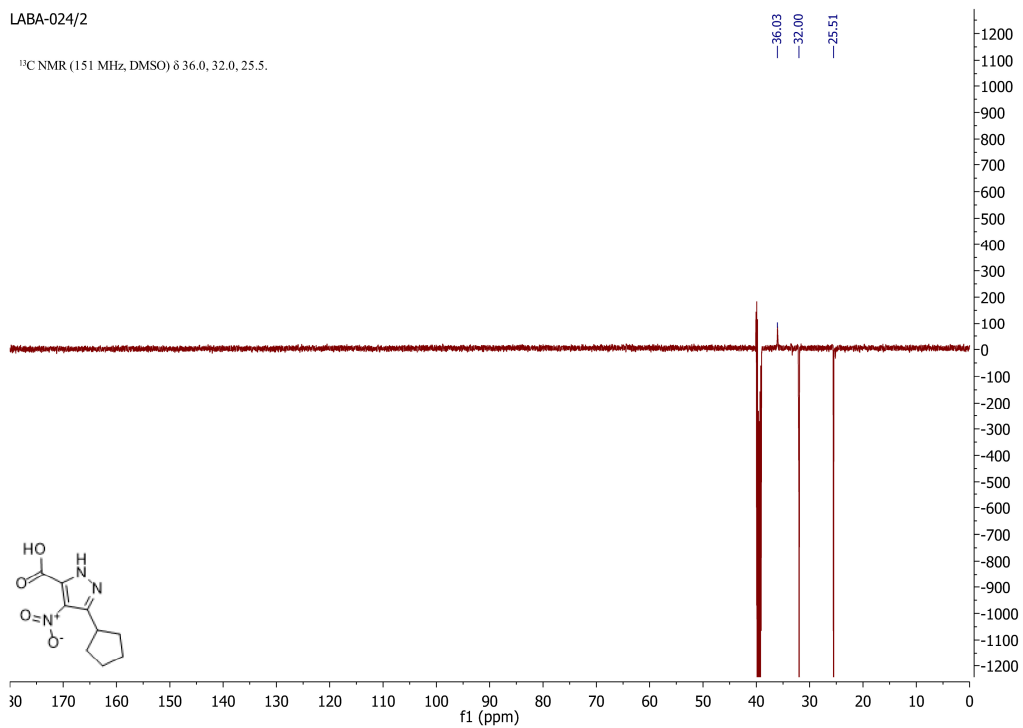

Figure S103.  $^{13}\text{C}$  NMR spectrum of compound **28a**.

Acquired by : Admin  
 Date Acquired : 24/5/2018 12:30:40 PM  
 Sample Name : YAZH01-126  
 Sample ID :  
 Tray# : 1  
 Vial# : 12  
 Injection Volume : 3  
 Data File : C:\LabSolutions\Data\2018\2018-wk21\YAZH01-126.lcd  
 Background File : blanco\_24052018.lcd  
 Method File : Method SCAN ACID standard.lcm  
 Report Format : DefaultL.CMS.lcr  
 Tuning File : C:\LabSolutions\Tuning\Tuning-ESI-pos-neg01072015a.lct  
 Processed by : Admin  
 Modified Date : 24/5/2018 2:23:18 PM

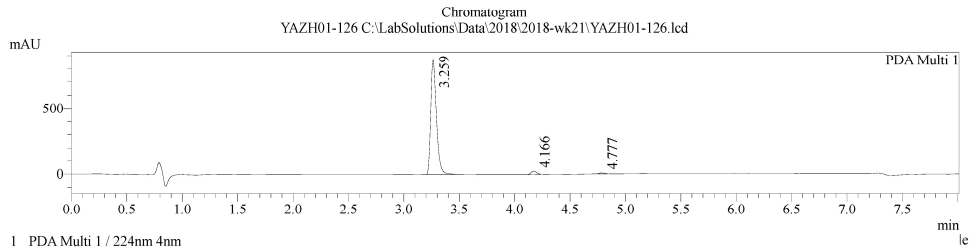

| Peak# | Name | Ret. Time | Area    | Area % |
|-------|------|-----------|---------|--------|
| 1     |      | 3.259     | 3089630 | 96.427 |
| 2     |      | 4.166     | 87842   | 2.742  |
| 3     |      | 4.777     | 26639   | 0.831  |

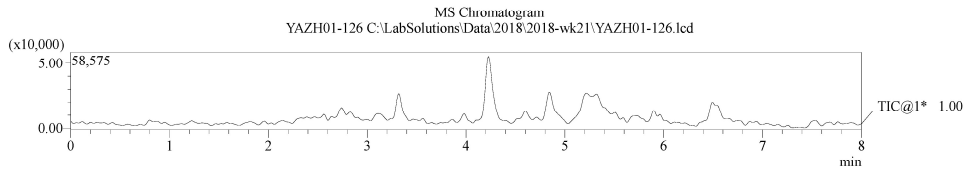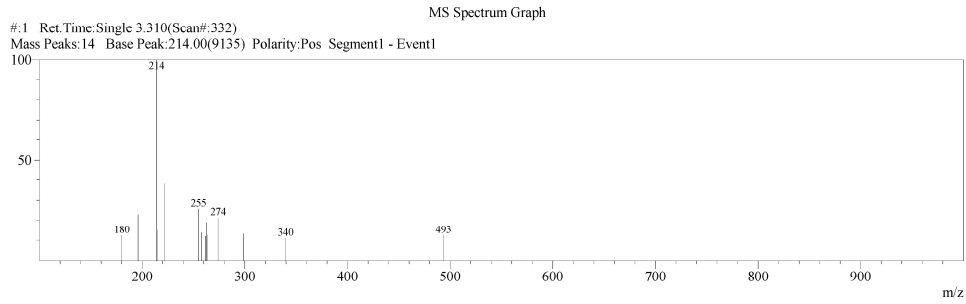

MS Spectrum Table

| # | m/z    | Abs.Inten. | Rel.Inten. | Charge | Polarity | Monoisotopic | #  | m/z    | Abs.Inten. | Rel.Inten. | Charge | Polarity | Monoisotopic |
|---|--------|------------|------------|--------|----------|--------------|----|--------|------------|------------|--------|----------|--------------|
| 1 | 179.95 | 1133       | 12.40      |        |          |              | 8  | 261.85 | 1089       | 11.92      |        |          |              |
| 2 | 195.95 | 2092       | 22.90      |        |          |              | 9  | 262.85 | 1727       | 18.91      |        |          |              |
| 3 | 214.00 | 9135       | 100.00     |        |          |              | 10 | 263.85 | 1142       | 12.50      |        |          |              |
| 4 | 215.05 | 1374       | 15.04      |        |          |              | 11 | 273.85 | 1949       | 21.34      |        |          |              |
| 5 | 222.00 | 3478       | 38.07      |        |          |              | 12 | 298.80 | 1197       | 13.10      |        |          |              |
| 6 | 254.85 | 2347       | 25.69      |        |          |              | 13 | 339.75 | 1002       | 10.97      |        |          |              |
| 7 | 257.90 | 1253       | 13.72      |        |          |              | 14 | 493.50 | 1137       | 12.45      |        |          |              |

Figure S104. LCMS spectrum of compound **28c**.

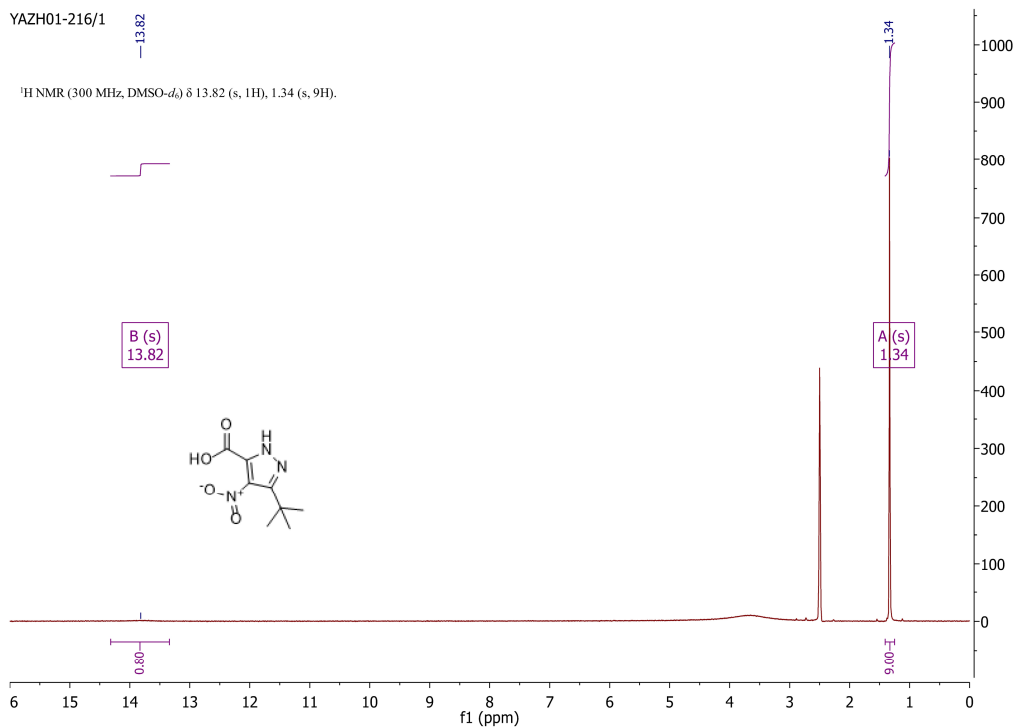

Figure S105. <sup>1</sup>H NMR spectrum of compound **28c**.

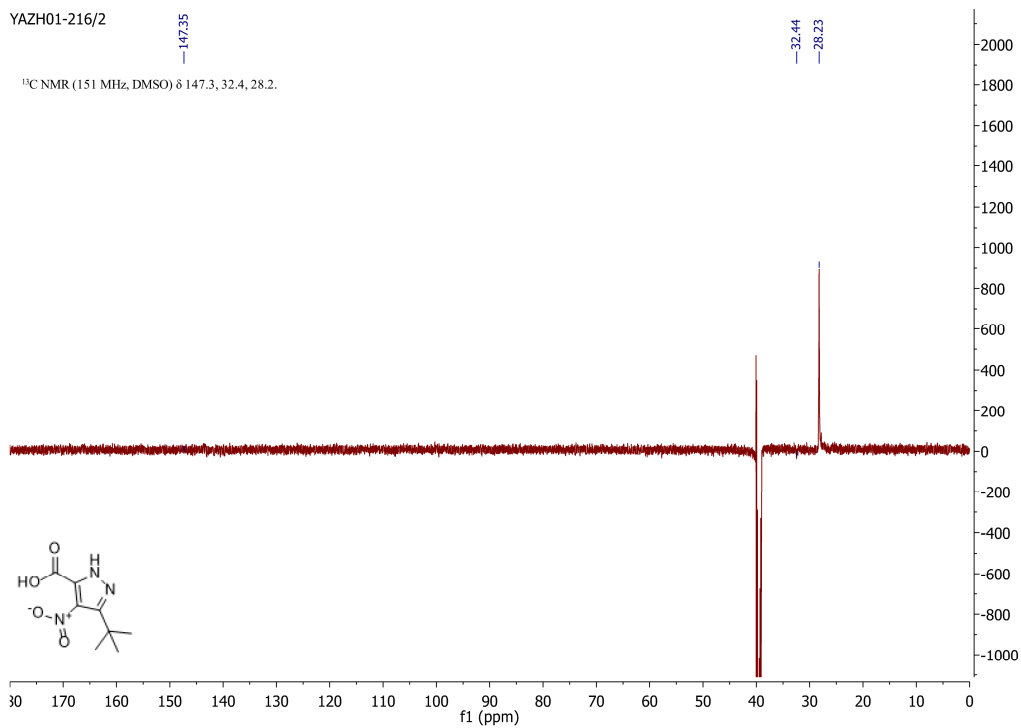

Figure S106. <sup>13</sup>C NMR spectrum of compound **28c**.

Acquired by : Admin  
 Date Acquired : 17/5/2018 4:33:53 PM  
 Sample Name : YAZH01-215  
 Sample ID :  
 Tray# : 1  
 Vial# : 12  
 Injection Volume : 1  
 Data File : C:\LabSolutions\Data\2018\2018-wk20\YAZH01-215-1.lcd  
 Background File : blanco 170518.lcd  
 Method File : Method SCAN ACID standard neg.lcm  
 Report Format : DefaultL.CMS.lcr  
 Tuning File : C:\LabSolutions\Tuning\Tuning-ESI-pos-neg01072015a.lct  
 Processed by : Admin  
 Modified Date : 17/5/2018 6:33:28 PM

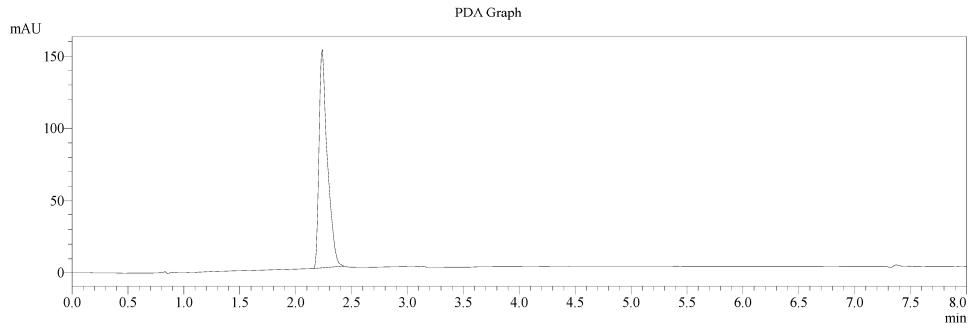

PDA Ch1 254nm 4nm

| Peak# | Name | Ret. Time | Area   | Area %  |
|-------|------|-----------|--------|---------|
| 1     |      | 2.231     | 783773 | 100.000 |

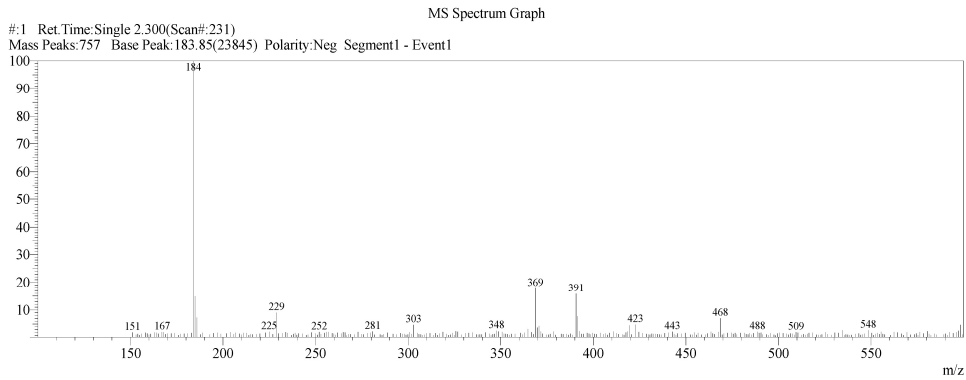

MS Spectrum Table

#1 Ret.Time:  
 BG Mode:None  
 Mass Peaks:757 Base Peak:183.85(23845) Polarity:Neg Segment1 - Event1

| #  | m/z    | Abs.Inten. | Rel.Inten. | Charge | Polarity | Monoisotopic | #  | m/z    | Abs.Inten. | Rel.Inten. | Charge | Polarity | Monoisotopic |
|----|--------|------------|------------|--------|----------|--------------|----|--------|------------|------------|--------|----------|--------------|
| 1  | 151.00 | 478        | 2.00       |        |          |              | 15 | 169.00 | 336        | 1.41       |        |          |              |
| 2  | 153.00 | 288        | 1.21       |        |          |              | 16 | 170.00 | 401        | 1.68       |        |          |              |
| 3  | 154.00 | 360        | 1.51       |        |          |              | 17 | 172.00 | 389        | 1.63       |        |          |              |
| 4  | 155.00 | 258        | 1.08       |        |          |              | 18 | 174.00 | 423        | 1.77       |        |          |              |
| 5  | 156.00 | 383        | 1.61       |        |          |              | 19 | 176.00 | 249        | 1.04       |        |          |              |
| 6  | 158.00 | 460        | 1.93       |        |          |              | 20 | 177.00 | 363        | 1.52       |        |          |              |
| 7  | 159.00 | 395        | 1.66       |        |          |              | 21 | 179.00 | 368        | 1.54       |        |          |              |
| 8  | 160.00 | 305        | 1.28       |        |          |              | 22 | 181.00 | 404        | 1.69       |        |          |              |
| 9  | 161.00 | 352        | 1.48       |        |          |              | 23 | 183.00 | 439        | 1.84       |        |          |              |
| 10 | 163.00 | 487        | 2.04       |        |          |              | 24 | 183.85 | 23845      | 100.00     |        |          |              |
| 11 | 164.00 | 470        | 1.97       |        |          |              | 25 | 184.90 | 3538       | 14.84      |        |          |              |
| 12 | 165.00 | 368        | 1.54       |        |          |              | 26 | 185.90 | 1748       | 7.33       |        |          |              |
| 13 | 167.00 | 520        | 2.18       |        |          |              | 27 | 187.90 | 313        | 1.31       |        |          |              |
| 14 | 168.00 | 501        | 2.10       |        |          |              | 28 | 188.90 | 460        | 1.93       |        |          |              |

Figure S107. LCMS spectrum of compound **28d**.

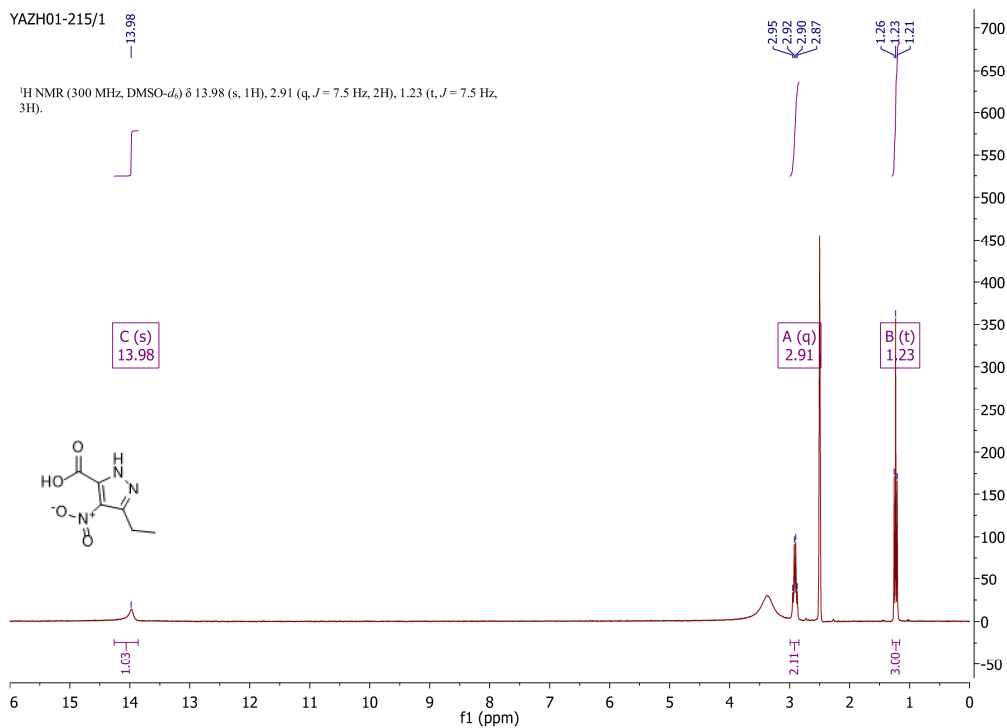

Figure S108. <sup>1</sup>H NMR spectrum of compound **28d**.

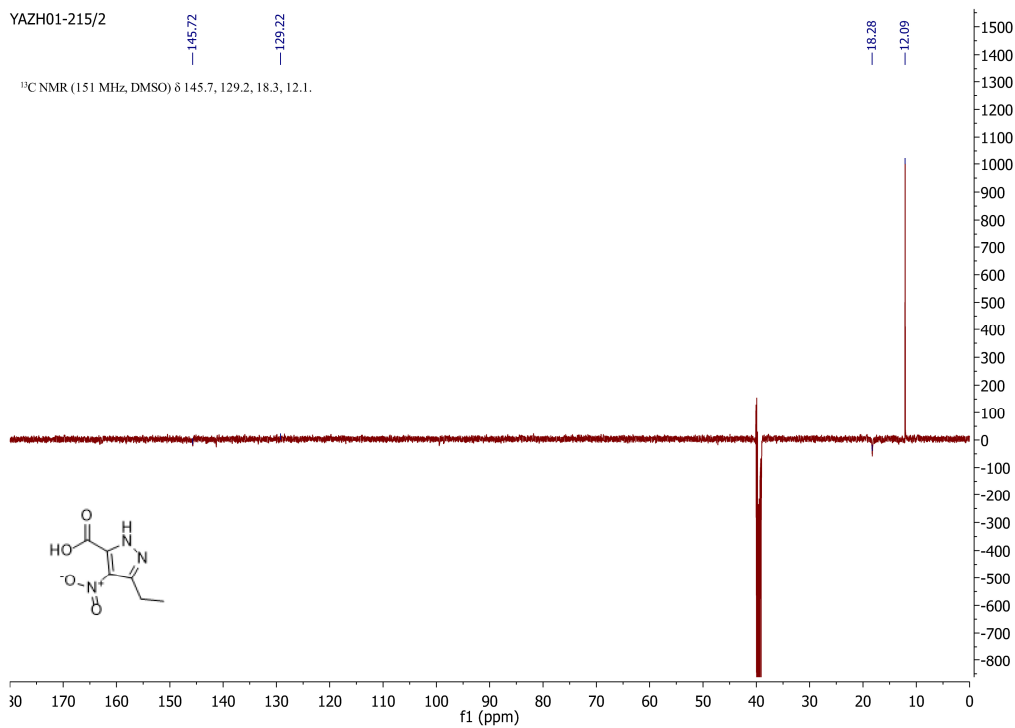

Figure S109. <sup>13</sup>C NMR spectrum of compound **28d**.



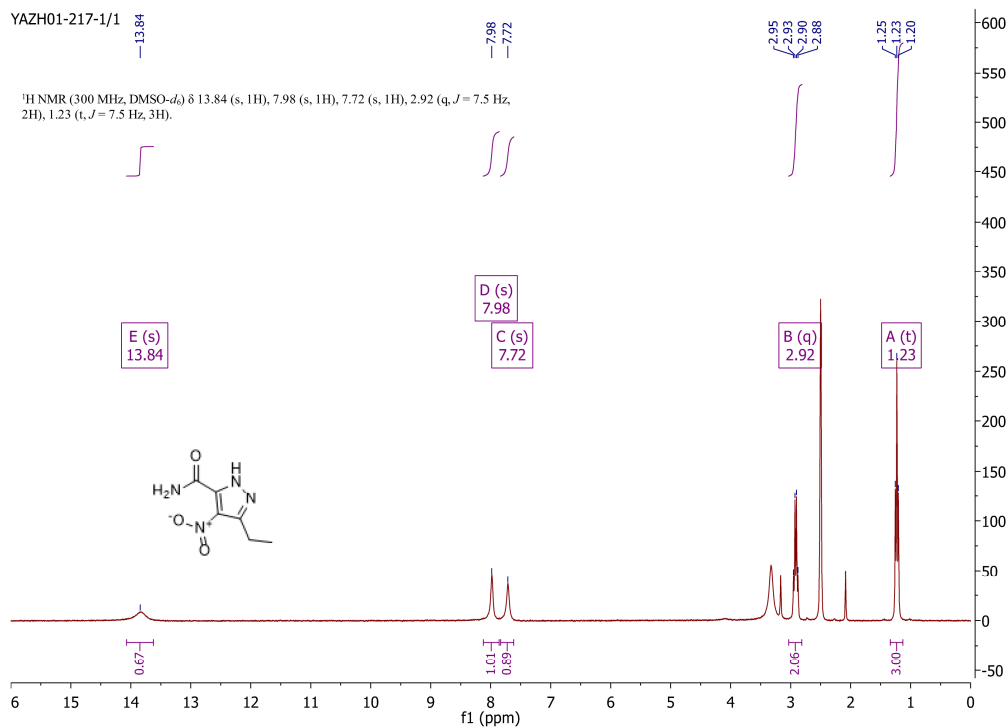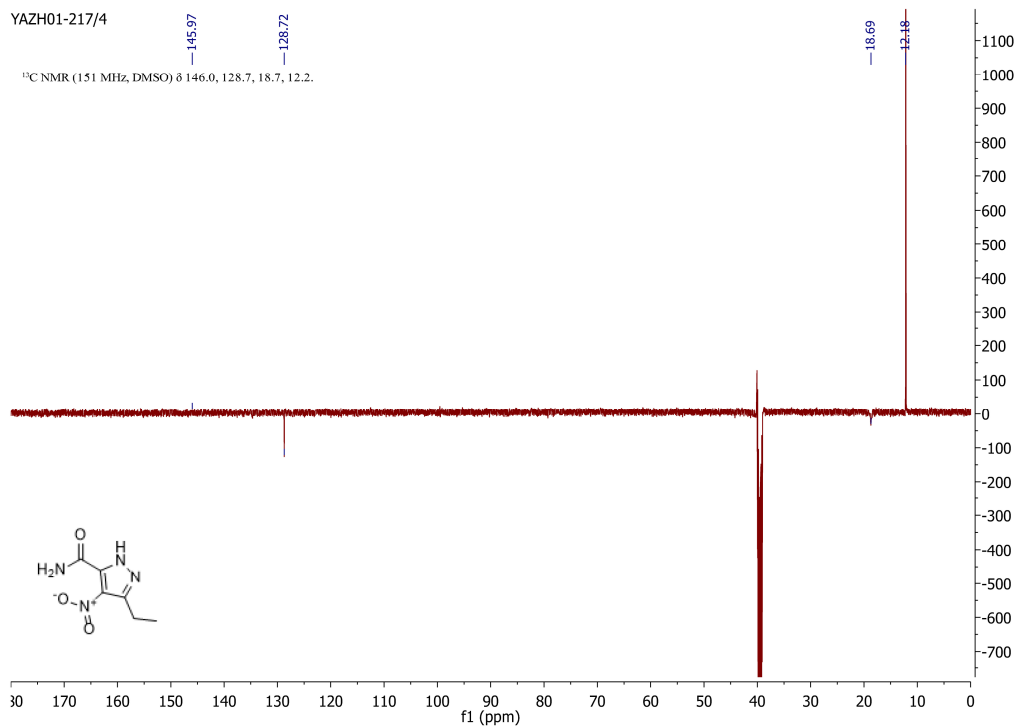

Acquired by : Admin  
 Date Acquired : 8/21/2017 3:12:01 PM  
 Sample Name : YAZH01-134  
 Sample ID :  
 Tray# : 1  
 Vial# : 40  
 Injection Volume : 1  
 Data File : C:\LabSolutions\Data\2017\2017-wk34\YAZH01-134.lcd  
 Background File : BLANCO21082017.lcd  
 Method File : Method SCAN ACID standard.lcm  
 Report Format : DefaultL.CMS.lcr  
 Tuning File : C:\LabSolutions\Tuning\Tuning-ESI-pos-neg01072015a.lct  
 Processed by : Admin  
 Modified Date : 8/21/2017 3:40:37 PM

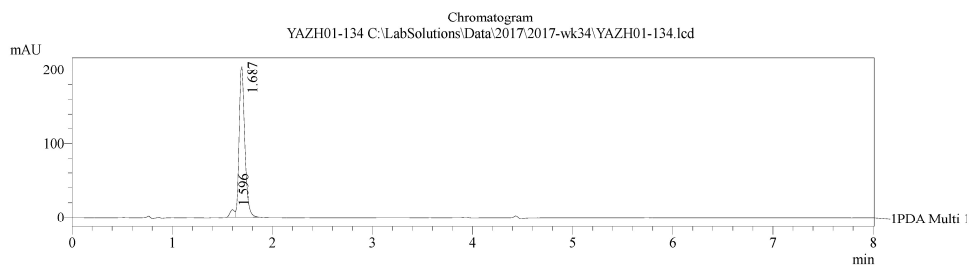

| Peak# | Name | Ret. Time | Area   | Area % |
|-------|------|-----------|--------|--------|
| 1     |      | 1.596     | 36034  | 4.373  |
| 2     |      | 1.687     | 787999 | 95.627 |

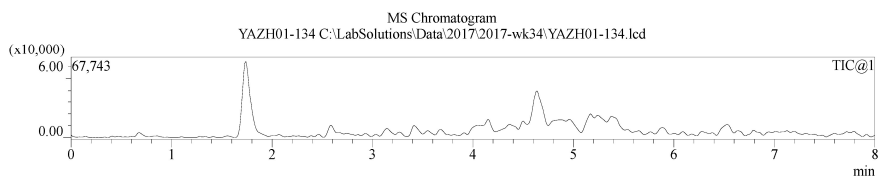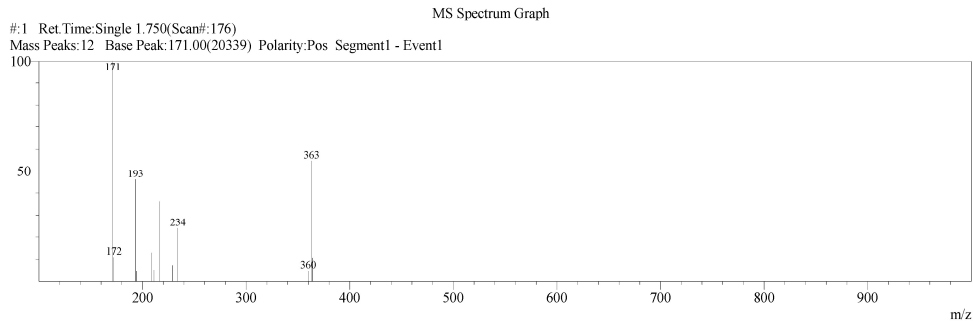

MS Spectrum Table

| # | m/z    | Abs.Inten. | Rel.Inten. | Charge | Polarity | Monoisotopic | #  | m/z    | Abs.Inten. | Rel.Inten. | Charge | Polarity | Monoisotopic |
|---|--------|------------|------------|--------|----------|--------------|----|--------|------------|------------|--------|----------|--------------|
| 1 | 171.00 | 20339      | 100.00     |        |          |              | 7  | 216.10 | 7347       | 36.12      |        |          |              |
| 2 | 172.20 | 2238       | 11.00      |        |          |              | 8  | 229.05 | 1522       | 7.48       |        |          |              |
| 3 | 193.05 | 9397       | 46.20      |        |          |              | 9  | 234.00 | 4866       | 23.92      |        |          |              |
| 4 | 194.00 | 1006       | 4.95       |        |          |              | 10 | 359.85 | 1012       | 4.98       |        |          |              |
| 5 | 209.00 | 2641       | 12.98      |        |          |              | 11 | 363.05 | 11123      | 54.69      |        |          |              |
| 6 | 211.00 | 1085       | 5.33       |        |          |              | 12 | 364.10 | 2179       | 10.71      |        |          |              |

Figure S113. LCMS spectrum of compound 29e.



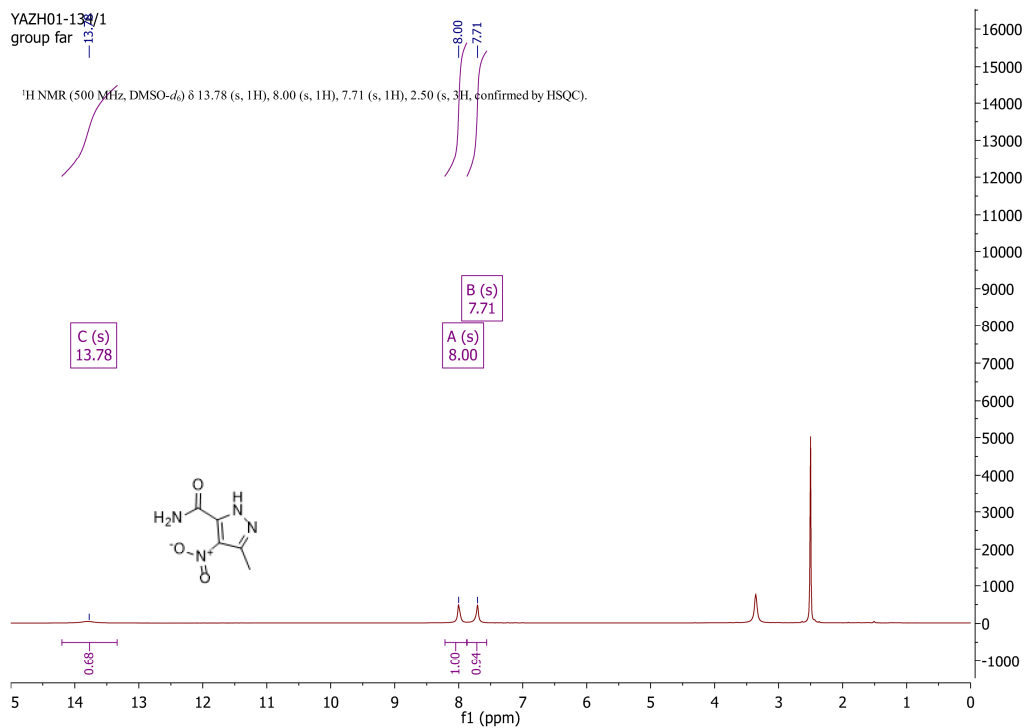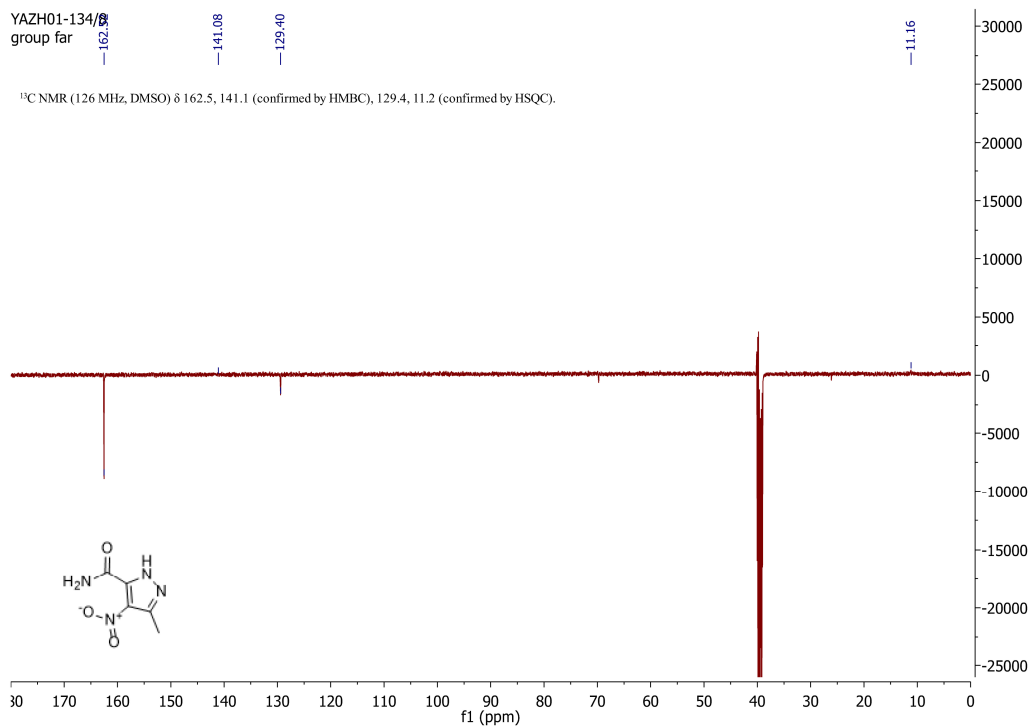

Acquired by : Admin  
 Date Acquired : 8/25/2017 11:08:22 AM  
 Sample Name : YAZH01-137-1  
 Sample ID :  
 Tray# : 1  
 Vial# : 12  
 Injection Volume : 10  
 Data File : C:\LabSolutions\Data\2017\2017-wk34\YAZH01-137-1.lcd  
 Background File : BLANCO25082017.lcd  
 Method File : Method SCAN ACID standard MW50.lcm  
 Report Format : DefaultLCMS.lcr  
 Tuning File : C:\LabSolutions\Tuning\Tuning-ESI-pos-neg01072015a.lct  
 Processed by : Admin  
 Modified Date : 8/25/2017 12:14:03 PM

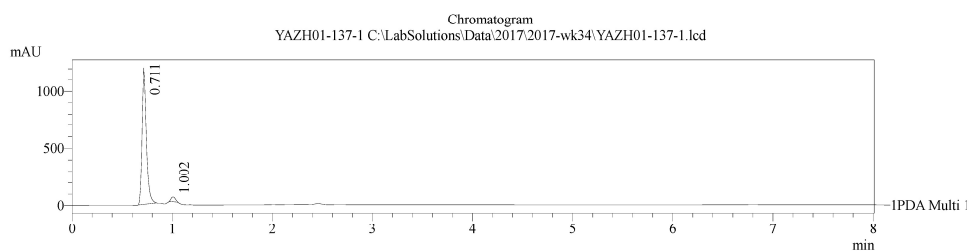

Peak Table

| Peak# | Name | Ret. Time | Area    | Area % |
|-------|------|-----------|---------|--------|
| 1     |      | 0.711     | 3474924 | 96.648 |
| 2     |      | 1.002     | 120517  | 3.352  |

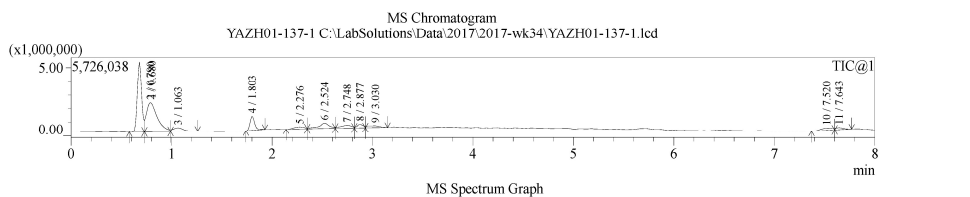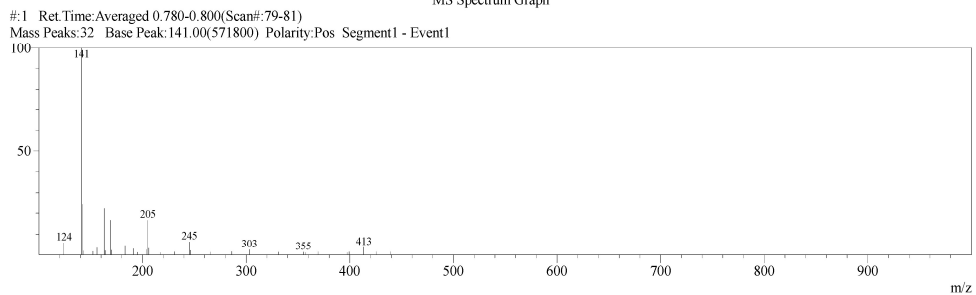

MS Spectrum Table

#1 Ret.Time:  
BG Mode:Calc 0.730<->0.990(74<->100)  
Mass Peaks:32 Base Peak:141.00(571800) Polarity:Pos Segment1 - Event1

| # | m/z    | Abs.Inten. | Rel.Inten. | Charge | Polarity | Monoisotopic | #  | m/z    | Abs.Inten. | Rel.Inten. | Charge | Polarity | Monoisotopic |
|---|--------|------------|------------|--------|----------|--------------|----|--------|------------|------------|--------|----------|--------------|
| 1 | 124.00 | 33633      | 5.88       |        |          |              | 9  | 169.05 | 94928      | 16.60      |        |          |              |
| 2 | 141.00 | 571800     | 100.00     |        |          |              | 10 | 170.10 | 12503      | 2.19       |        |          |              |
| 3 | 142.00 | 137717     | 24.08      |        |          |              | 11 | 183.10 | 25925      | 4.53       |        |          |              |
| 4 | 143.00 | 10576      | 1.85       |        |          |              | 12 | 191.05 | 17087      | 2.99       |        |          |              |
| 5 | 152.10 | 9772       | 1.71       |        |          |              | 13 | 195.15 | 6916       | 1.21       |        |          |              |
| 6 | 156.00 | 19768      | 3.46       |        |          |              | 14 | 204.05 | 14362      | 2.51       |        |          |              |
| 7 | 163.00 | 127066     | 22.22      |        |          |              | 15 | 205.05 | 94767      | 16.57      |        |          |              |
| 8 | 163.95 | 11210      | 1.96       |        |          |              | 16 | 206.05 | 17858      | 3.12       |        |          |              |

Figure S116. LCMS spectrum of compound 30e.

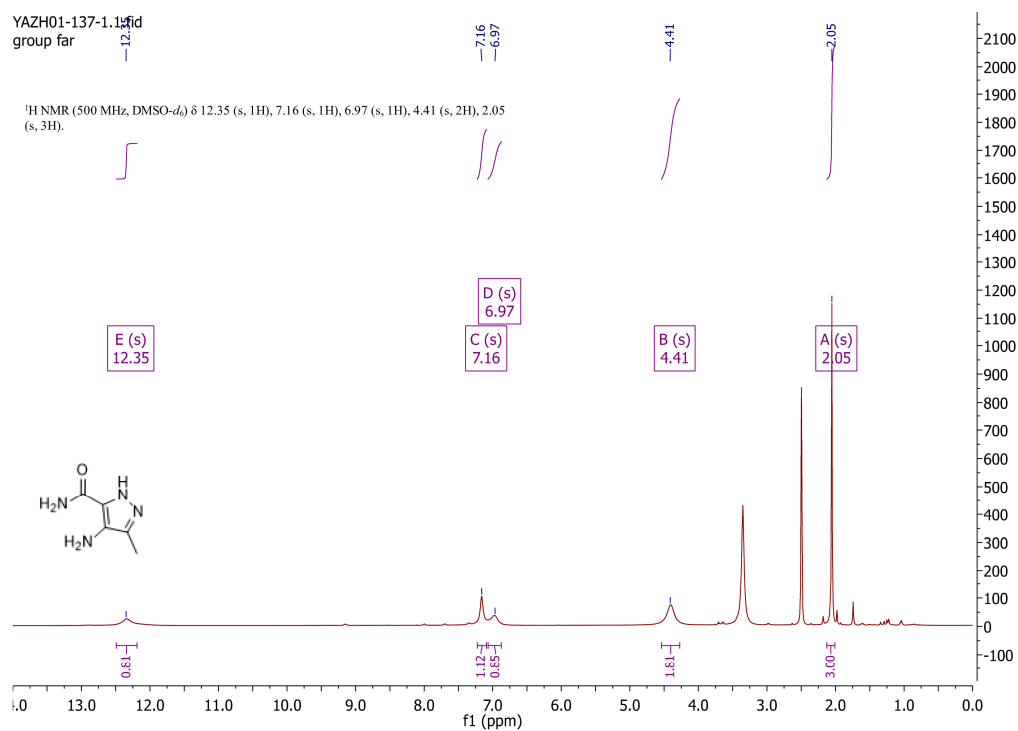

Figure S117. <sup>1</sup>H NMR spectrum of compound 30e.

Acquired by : Admin  
 Date Acquired : 17/7/2018 3:20:53 PM  
 Sample Name : LABA-025-ENDPR  
 Sample ID :  
 Tray# : 1  
 Vial# : 32  
 Injection Volume : 1  
 Data File : C:\LabSolutions\Data\2018\2018-wk29\LABA-025-ENDPR.lcd  
 Background File : blanco 17072018.lcd  
 Method File : Method SCAN ACID standard.lcm  
 Report Format : Default.CMS.lcr  
 Tuning File : C:\LabSolutions\Tuning\Tuning-ESI-pos-neg01072015a.lct  
 Processed by : Admin  
 Modified Date : 17/7/2018 3:56:31 PM

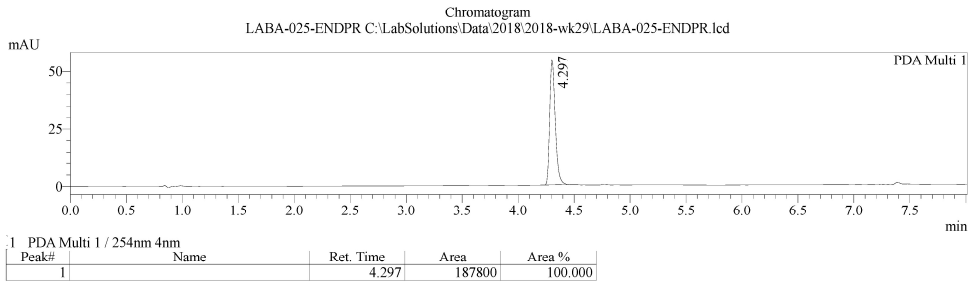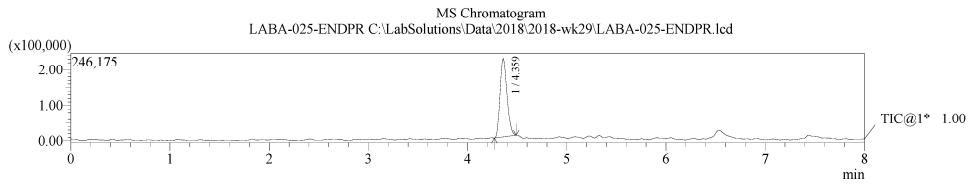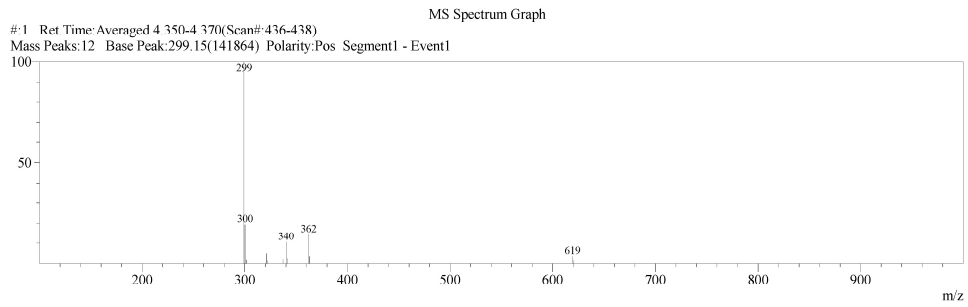

MS Spectrum Table  
#1 Ret Time:  
BG Mode: Calc 4.270-<->4.490 (428-<->450)

| # | m/z    | Abs.Inten. | Rel.Inten. | Charge | Polarity | Monoisotopic | #  | m/z    | Abs.Inten. | Rel.Inten. | Charge | Polarity | Monoisotopic |
|---|--------|------------|------------|--------|----------|--------------|----|--------|------------|------------|--------|----------|--------------|
| 1 | 299.15 | 141864     | 100.00     |        |          |              | 7  | 340.20 | 14881      | 10.49      |        |          |              |
| 2 | 300.15 | 27404      | 19.32      |        |          |              | 8  | 341.15 | 3574       | 2.52       |        |          |              |
| 3 | 301.35 | 2464       | 1.74       |        |          |              | 9  | 362.15 | 20335      | 14.33      |        |          |              |
| 4 | 321.10 | 6833       | 4.82       |        |          |              | 10 | 363.15 | 4944       | 3.49       |        |          |              |
| 5 | 322.15 | 2042       | 1.44       |        |          |              | 11 | 619.25 | 4795       | 3.38       |        |          |              |
| 6 | 337.15 | 2872       | 2.02       |        |          |              | 12 | 620.20 | 2208       | 1.56       |        |          |              |

Figure S118. LCMS spectrum of compound **31a**.

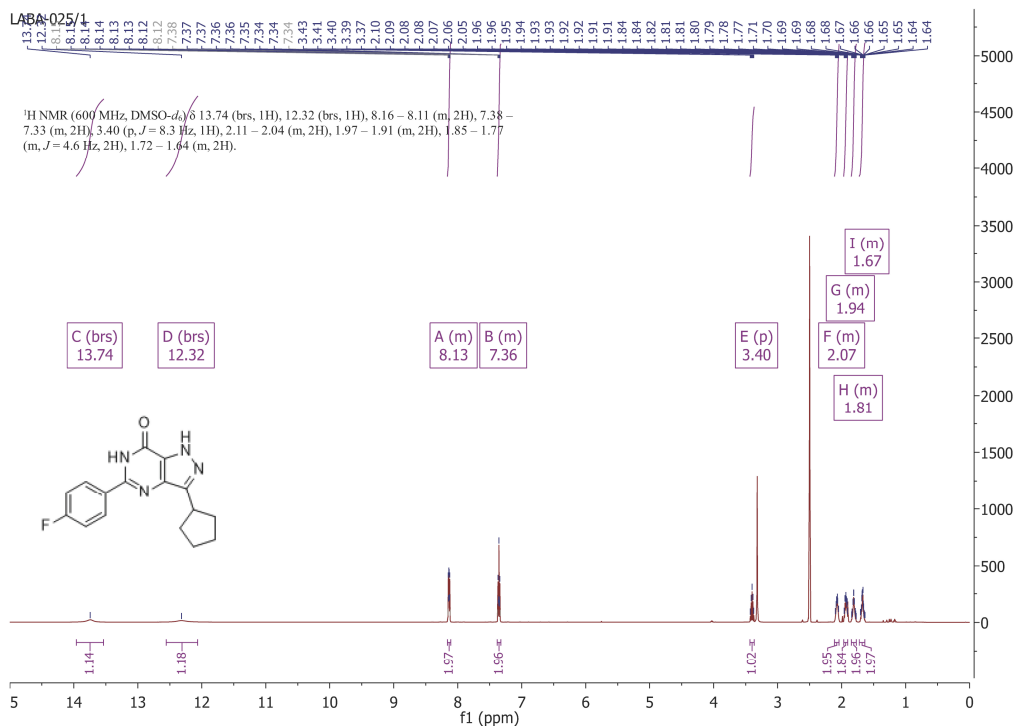

Figure S119.  $^1\text{H}$  NMR spectrum of compound 31a.

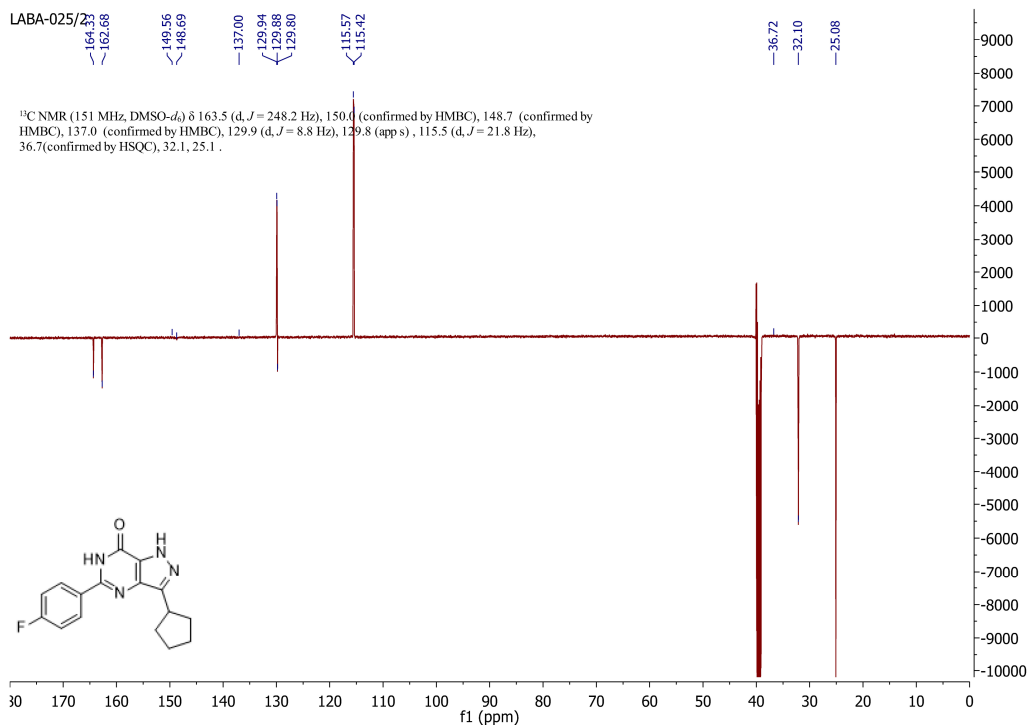

Figure S120.  $^{13}\text{C}$  NMR spectrum of compound 31a.

Acquired by : Admin  
 Date Acquired : 10/12/2018 9:07:44 AM  
 Sample Name : ODVI01\_044 3-6 10122018  
 Sample ID :  
 Tray# : 1  
 Vial# : 2  
 Injection Volume : 2  
 Data File : C:\LabSolutions\Data\2018\2018-wk50\ODVI01\_044 3-6 10122018.lcd  
 Background File : blanco 10122018.lcd  
 Method File : Method SCAN ACID standard.lcm  
 Report Format : DefaultL.CMS.lcr  
 Tuning File : C:\LabSolutions\Tuning\Tuning-ESI-pos-neg01072015a.lct  
 Processed by : Admin  
 Modified Date : 10/12/2018 9:17:37 AM

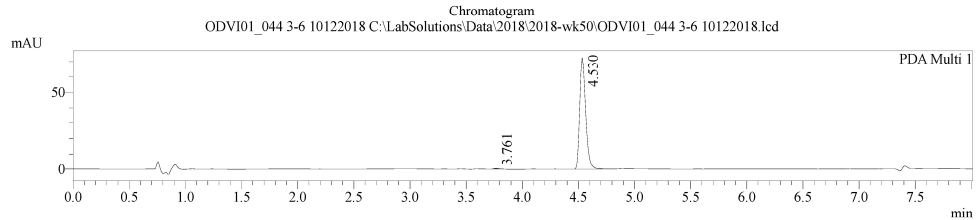

1 PDA Multi 1 / 254nm 4nm  
 PDA Ch1 254nm 4nm

| Peak# | Name | Ret. Time | Area   | Area % |
|-------|------|-----------|--------|--------|
| 1     |      | 3.761     | 942    | 0.351  |
| 2     |      | 4.530     | 266986 | 99.649 |

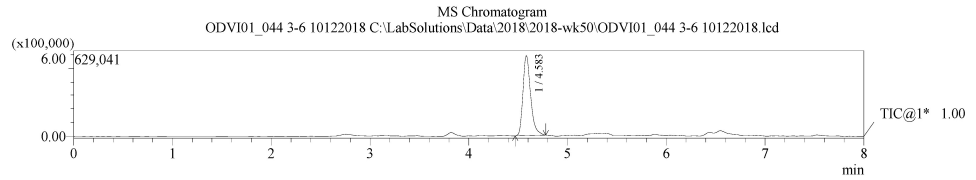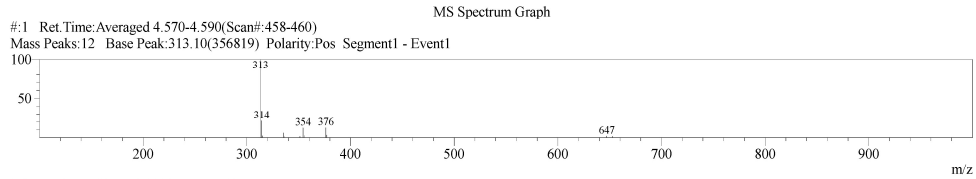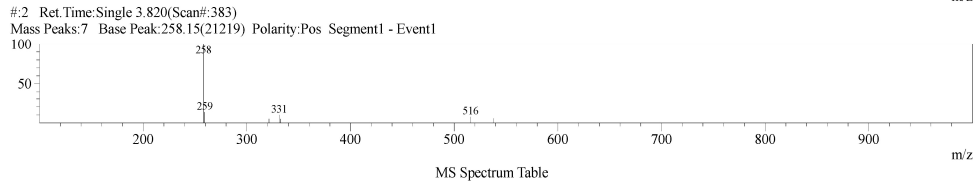

MS Spectrum Table  
 #1 Ret Time:  
 BG Mode:Calc 4.470<->4.780(448<->479)  
 Mass Peaks:12 Base Peak:313.10(356819) Polarity:Pos Segment1 - Event1

| # | m/z    | Abs.Inten. | Rel.Inten. | Charge | Polarity | Monoisotopic | #  | m/z    | Abs.Inten. | Rel.Inten. | Charge | Polarity | Monoisotopic |
|---|--------|------------|------------|--------|----------|--------------|----|--------|------------|------------|--------|----------|--------------|
| 1 | 313.10 | 356819     | 100.00     |        |          |              | 7  | 354.15 | 43530      | 12.20      |        |          |              |
| 2 | 314.10 | 75772      | 21.24      |        |          |              | 8  | 355.15 | 8991       | 2.52       |        |          |              |
| 3 | 315.05 | 8093       | 2.27       |        |          |              | 9  | 376.10 | 44498      | 12.47      |        |          |              |
| 4 | 335.15 | 21537      | 6.04       |        |          |              | 10 | 377.05 | 11658      | 3.27       |        |          |              |
| 5 | 336.15 | 5160       | 1.45       |        |          |              | 11 | 647.20 | 6549       | 1.84       |        |          |              |
| 6 | 351.15 | 6088       | 1.71       |        |          |              | 12 | 652.50 | 5918       | 1.66       |        |          |              |

MS Spectrum Table  
 #2 Ret Time:  
 BG Mode:None  
 Mass Peaks:7 Base Peak:258.15(21219) Polarity:Pos Segment1 - Event1

| # | m/z    | Abs.Inten. | Rel.Inten. | Charge | Polarity | Monoisotopic | # | m/z    | Abs.Inten. | Rel.Inten. | Charge | Polarity | Monoisotopic |
|---|--------|------------|------------|--------|----------|--------------|---|--------|------------|------------|--------|----------|--------------|
| 1 | 258.15 | 21219      | 100.00     |        |          |              | 5 | 332.10 | 1029       | 4.85       |        |          |              |
| 2 | 259.35 | 2860       | 13.48      |        |          |              | 6 | 515.80 | 1603       | 7.55       |        |          |              |
| 3 | 321.25 | 1058       | 4.99       |        |          |              | 7 | 537.75 | 1177       | 5.55       |        |          |              |
| 4 | 331.10 | 2095       | 9.87       |        |          |              |   |        |            |            |        |          |              |

Figure S121. LCMS spectrum of compound **31b**.

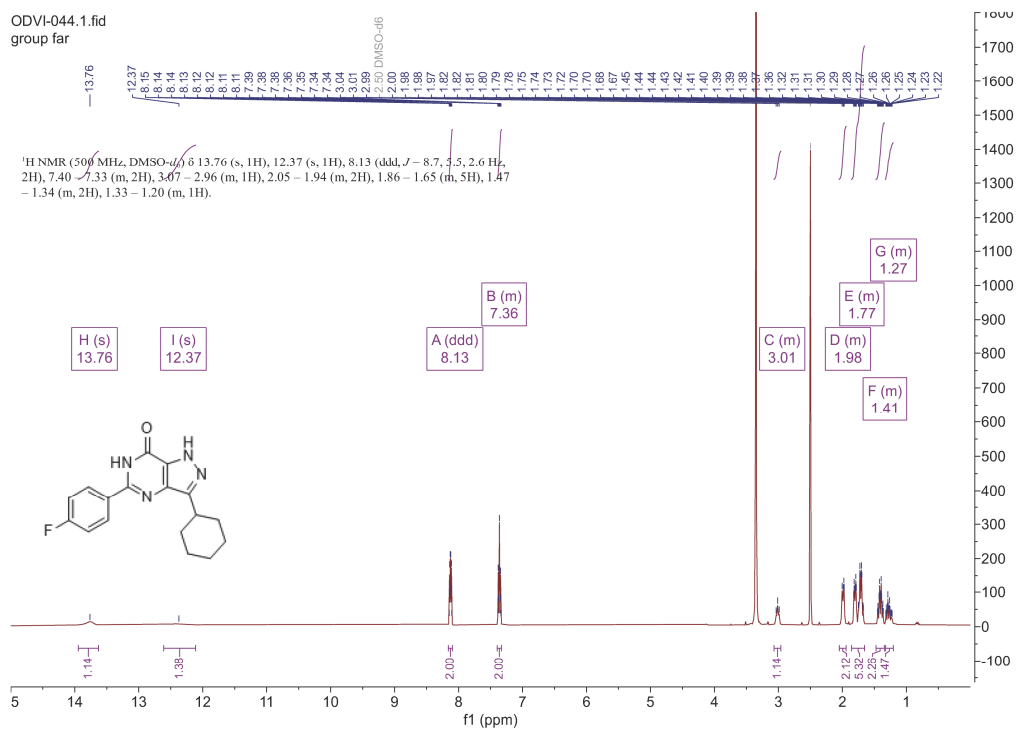

Figure S122. <sup>1</sup>H NMR spectrum of compound **31b**.

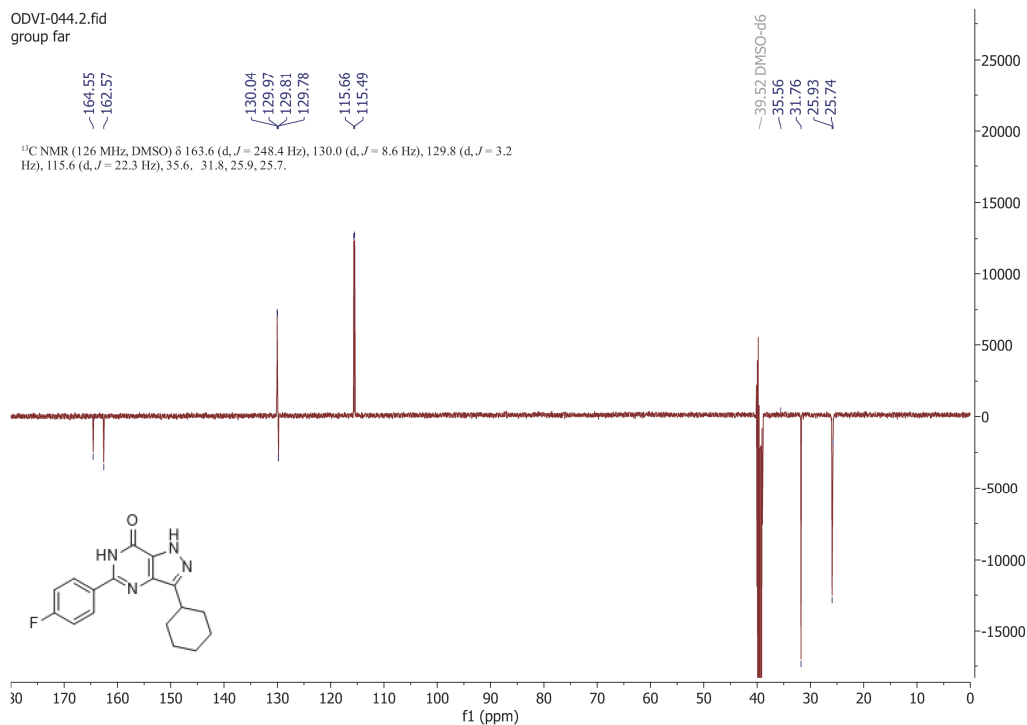

Figure S123. <sup>13</sup>C NMR spectrum of compound **31b**.

Acquired by : Admin  
 Date Acquired : 7/8/2018 10:24:01 AM  
 Sample Name : YAZH01-233  
 Sample ID :  
 Tray# : 1  
 Vial# : 6  
 Injection Volume : 3  
 Data File : C:\LabSolutions\Data\2018\2018-wk32\YAZH01-233.lcd  
 Background File : blanco 070818.lcd  
 Method File : Method SCAN ACID standard.lcm  
 Report Format : DefaultL.CMS.lcr  
 Tuning File : C:\LabSolutions\Tuning\Tuning-ESI-pos-neg01072015a.lct  
 Processed by : Admin  
 Modified Date : 7/8/2018 10:33:54 AM

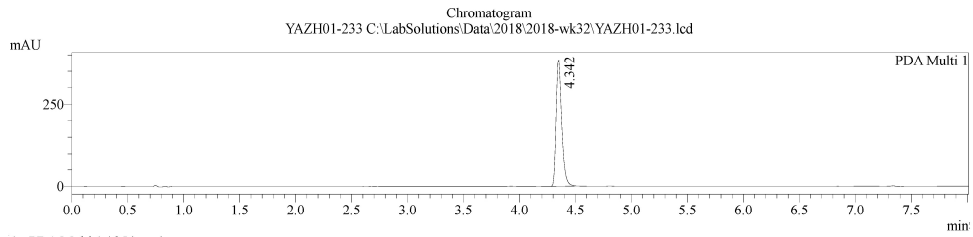

| Peak# | Name | Ret. Time | Area    | Area %  |
|-------|------|-----------|---------|---------|
| 1     |      | 4.342     | 1344980 | 100.000 |

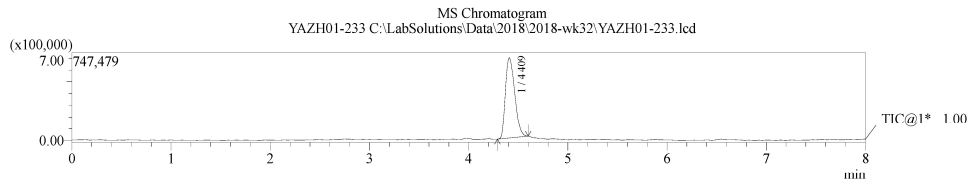

MS Spectrum Graph

#1 Ret. Time: Averaged 4.400-4.420(Scan#:441-443)  
 Mass Peaks:15 Base Peak:287.15(323082) Polarity:Pos Segment1 - Event1

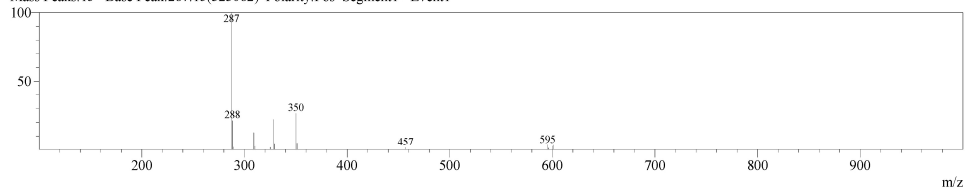

MS Spectrum Table

#1 Ret. Time:  
 RG Mode:Calc 4 290<->4 600(430<->461)

| # | m/z    | Abs.Inten. | Rel.Inten. | Charge | Polarity | Monoisotopic | #  | m/z    | Abs.Inten. | Rel.Inten. | Charge | Polarity | Monoisotopic |
|---|--------|------------|------------|--------|----------|--------------|----|--------|------------|------------|--------|----------|--------------|
| 1 | 287.15 | 323082     | 100.00     |        |          |              | 9  | 350.10 | 85019      | 26.31      |        |          |              |
| 2 | 288.15 | 68146      | 21.09      |        |          |              | 10 | 351.20 | 15835      | 4.90       |        |          |              |
| 3 | 289.25 | 5304       | 1.64       |        |          |              | 11 | 456.95 | 4410       | 1.36       |        |          |              |
| 4 | 309.10 | 40327      | 12.48      |        |          |              | 12 | 595.40 | 10554      | 3.27       |        |          |              |
| 5 | 310.10 | 7211       | 2.23       |        |          |              | 13 | 596.45 | 3293       | 1.02       |        |          |              |
| 6 | 325.05 | 5165       | 1.60       |        |          |              | 14 | 600.45 | 7979       | 2.47       |        |          |              |
| 7 | 328.15 | 70804      | 21.92      |        |          |              | 15 | 600.70 | 10022      | 3.10       |        |          |              |
| 8 | 329.15 | 14802      | 4.58       |        |          |              |    |        |            |            |        |          |              |

Figure S124. LCMS spectrum of compound **31c**.



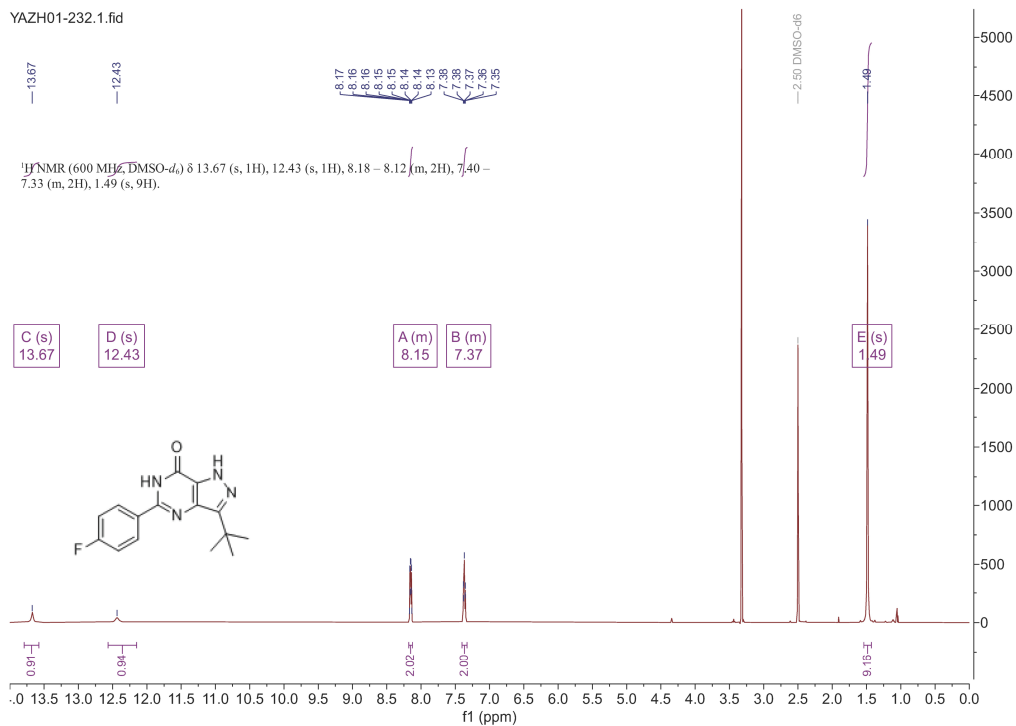

Figure S125.  $^1\text{H NMR}$  spectrum of compound **31c**.

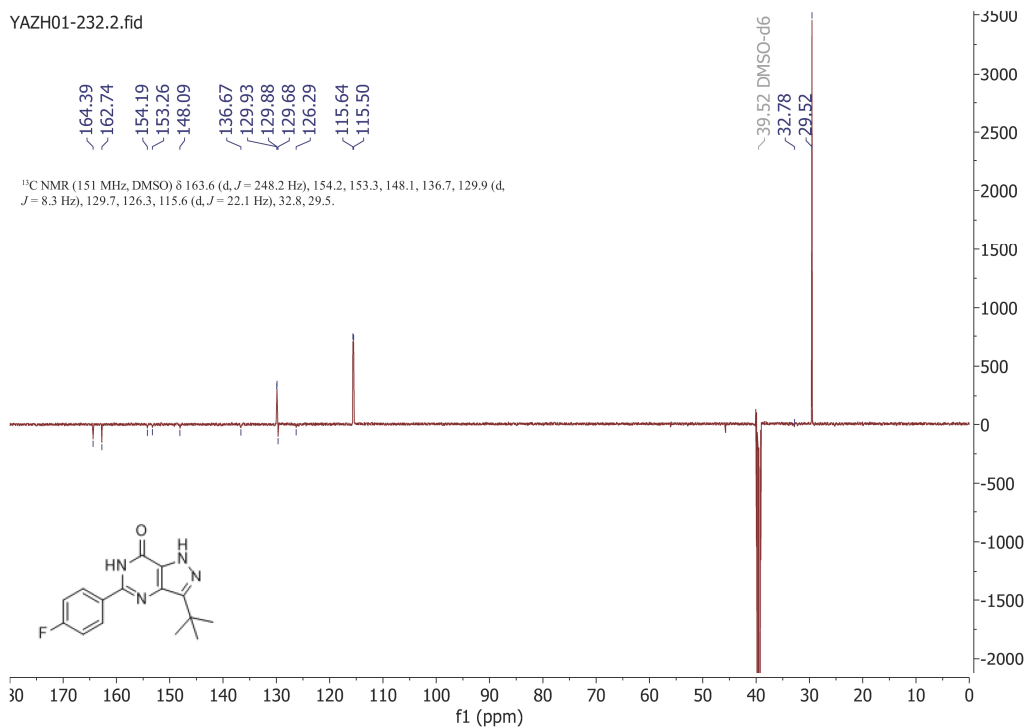

Figure S126.  $^{13}\text{C NMR}$  spectrum of compound **31c**.

Acquired by : Admin  
 Date Acquired : 27/6/2018 12:16:59 PM  
 Sample Name : YAZH01-221  
 Sample ID :  
 Tray# : 1  
 Vial# : 46  
 Injection Volume : 3  
 Data File : C:\LabSolutions\Data\2018\2018-wk26\YAZH01-221.lcd  
 Background File : blanco 27062018.lcd  
 Method File : Method SCAN ACID standard.lcm  
 Report Format : Default.CMS.lcr  
 Tuning File : C:\LabSolutions\Tuning\Tuning-ESI-pos-neg01072015a.lct  
 Processed by : Admin  
 Modified Date : 27/6/2018 12:35:32 PM

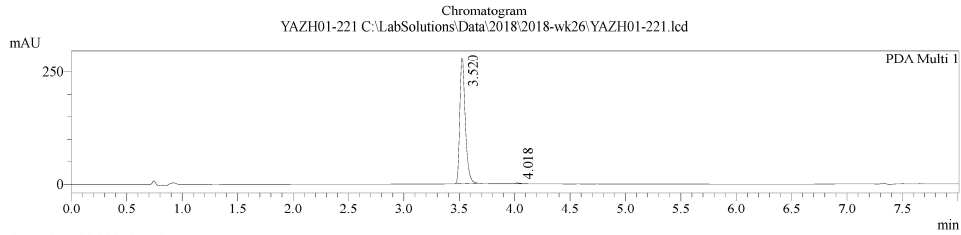

PeakTable

| Peak# | Name | Ret. Time | Area   | Area % |
|-------|------|-----------|--------|--------|
| 1     |      | 3.520     | 963705 | 99.477 |
| 2     |      | 4.018     | 5062   | 0.523  |

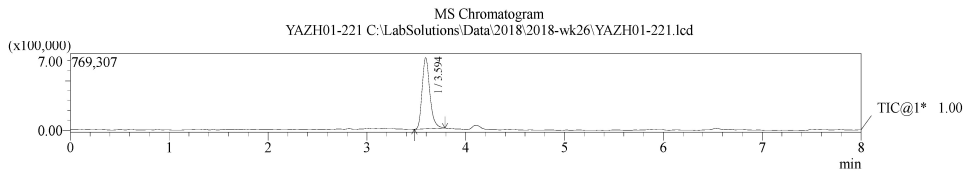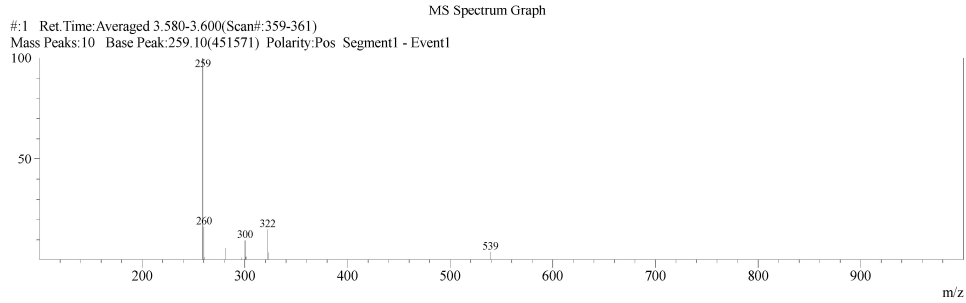

MS Spectrum Table

| # | m/z    | Abs.Inten. | Rel.Inten. | Charge | Polarity | Monoisotopic | #  | m/z    | Abs.Inten. | Rel.Inten. | Charge | Polarity | Monoisotopic |
|---|--------|------------|------------|--------|----------|--------------|----|--------|------------|------------|--------|----------|--------------|
| 1 | 259.10 | 451571     | 100.00     |        |          |              | 6  | 300.15 | 43860      | 9.71       |        |          |              |
| 2 | 260.10 | 73084      | 16.18      |        |          |              | 7  | 301.15 | 8388       | 1.86       |        |          |              |
| 3 | 261.05 | 7254       | 1.61       |        |          |              | 8  | 322.15 | 67636      | 14.98      |        |          |              |
| 4 | 281.10 | 27348      | 6.06       |        |          |              | 9  | 323.05 | 17785      | 3.94       |        |          |              |
| 5 | 297.00 | 6123       | 1.36       |        |          |              | 10 | 539.30 | 18577      | 4.11       |        |          |              |

Figure S127. LCMS spectrum of compound **31d**.

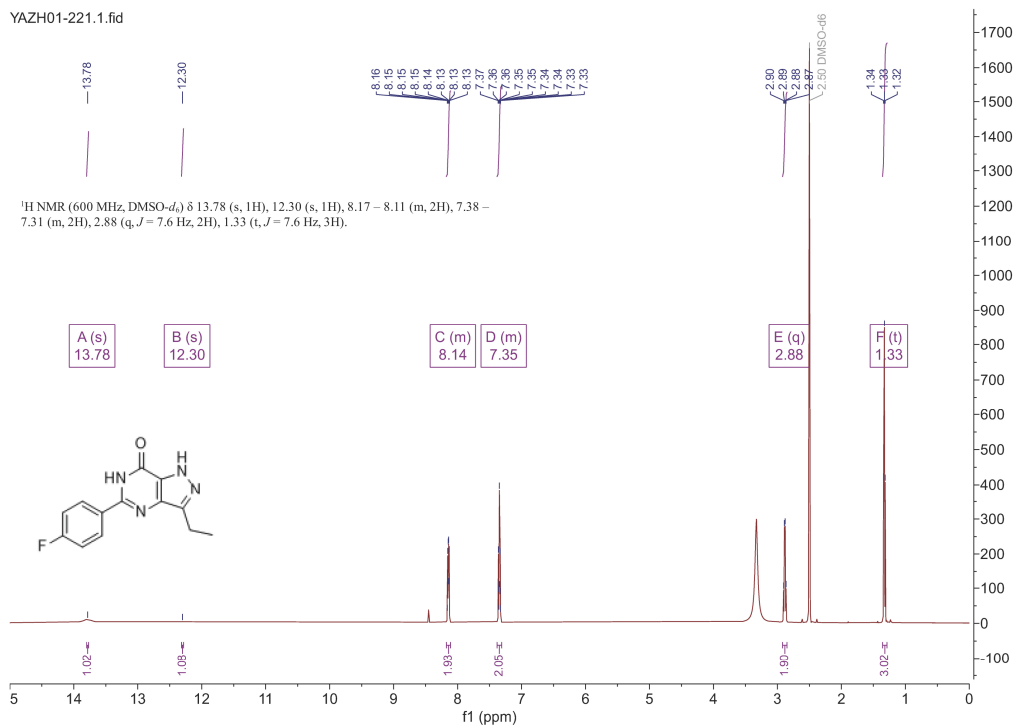

Figure S128. <sup>1</sup>H NMR spectrum of compound **31d**.

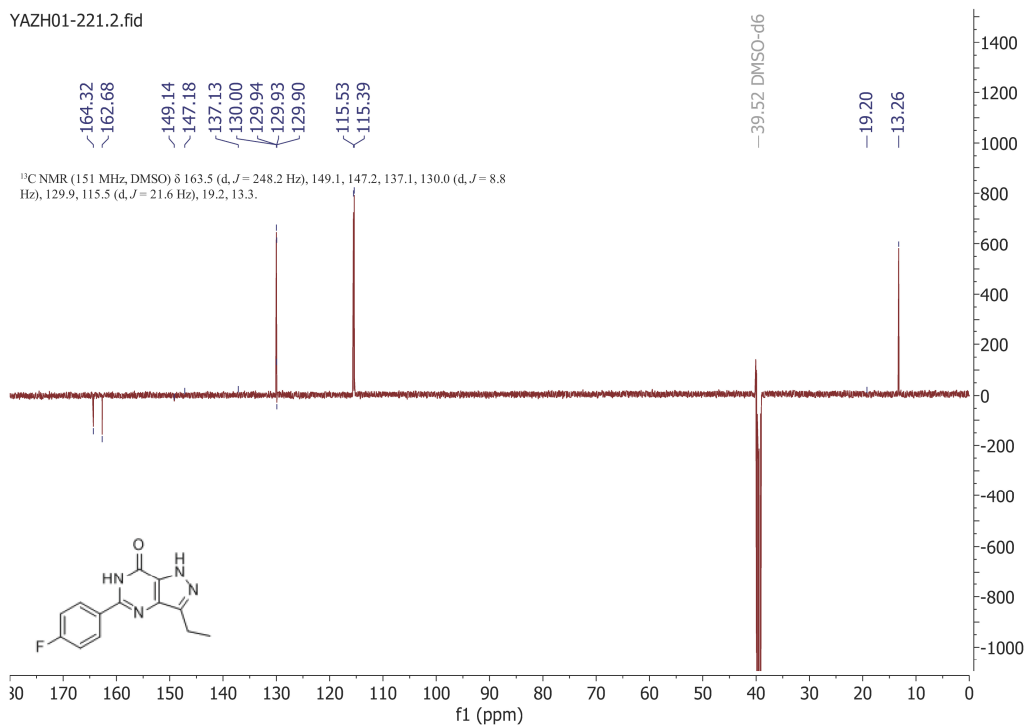

Figure S129. <sup>13</sup>C NMR spectrum of compound **31d**.

Acquired by : Admin  
 Date Acquired : 20/10/2017 4:13:41 PM  
 Sample Name : YAZH01-153-4  
 Sample ID :  
 Tray# : 1  
 Vial# : 14  
 Injection Volume : 10  
 Data File : C:\LabSolutions\Data\2017\2017-wk42\YAZH01-153-4.lcd  
 Background File : blanco 20102017.lcd  
 Method File : Method SCAN ACID standard.lcm  
 Report Format : DefaultLCMS.lcr  
 Tuning File : C:\LabSolutions\Tuning\Tuning-ESI-pos-neg01072015a.lct  
 Processed by : Admin  
 Modified Date : 7/6/2019 5:51:55 PM

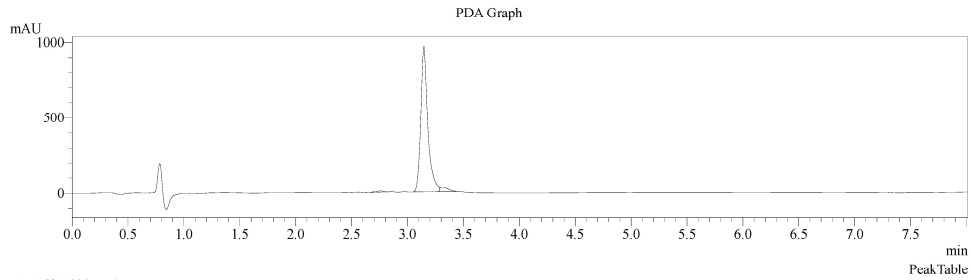

PDA Ch1 230nm 4nm

| Peak# | Name | Ret. Time | Area    | Area % |
|-------|------|-----------|---------|--------|
| 1     |      | 2.755     | 39494   | 0.905  |
| 2     |      | 3.140     | 4178158 | 95.689 |
| 3     |      | 3.296     | 148718  | 3.406  |

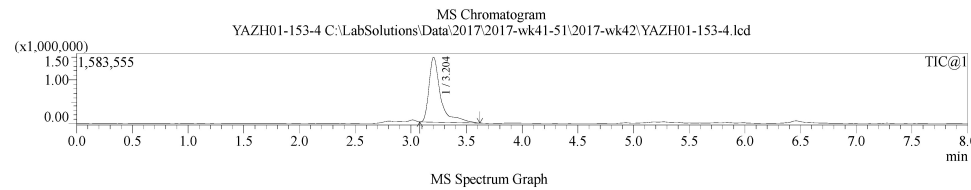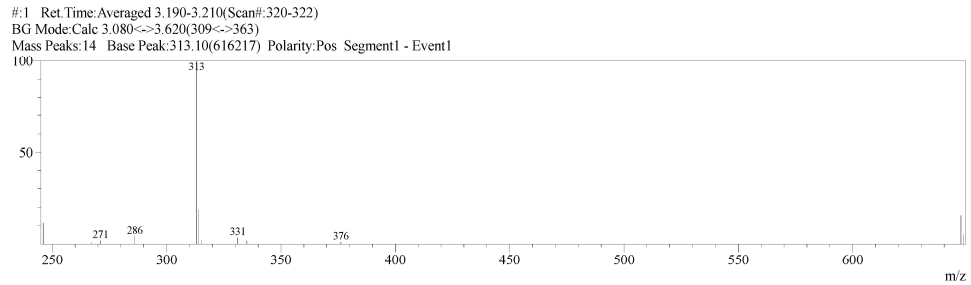

MS Spectrum Table

#:1 Ret.Time:  
 BG Mode:Calc 3.080<->3.620(309<->363)  
 Mass Peaks:14 Base Peak:313.10(616217) Polarity:Pos Segment1 - Event1

| # | m/z    | Abs.Inten. | Rel.Inten. | Charge | Polarity | Monoisotopic | #  | m/z    | Abs.Inten. | Rel.Inten. | Charge | Polarity | Monoisotopic |
|---|--------|------------|------------|--------|----------|--------------|----|--------|------------|------------|--------|----------|--------------|
| 1 | 245.05 | 450100     | 73.04      |        |          |              | 8  | 315.15 | 13252      | 2.15       |        |          |              |
| 2 | 246.05 | 69475      | 11.27      |        |          |              | 9  | 331.10 | 20953      | 3.40       |        |          |              |
| 3 | 267.10 | 6364       | 1.03       |        |          |              | 10 | 335.10 | 10290      | 1.67       |        |          |              |
| 4 | 271.10 | 11398      | 1.85       |        |          |              | 11 | 376.20 | 6628       | 1.08       |        |          |              |
| 5 | 286.05 | 24835      | 4.03       |        |          |              | 12 | 647.35 | 93552      | 15.18      |        |          |              |
| 6 | 313.10 | 616217     | 100.00     |        |          |              | 13 | 648.35 | 31493      | 5.11       |        |          |              |
| 7 | 314.10 | 112209     | 18.21      |        |          |              | 14 | 649.45 | 6417       | 1.04       |        |          |              |

Figure S130. LCMS spectrum of compound **31e**.

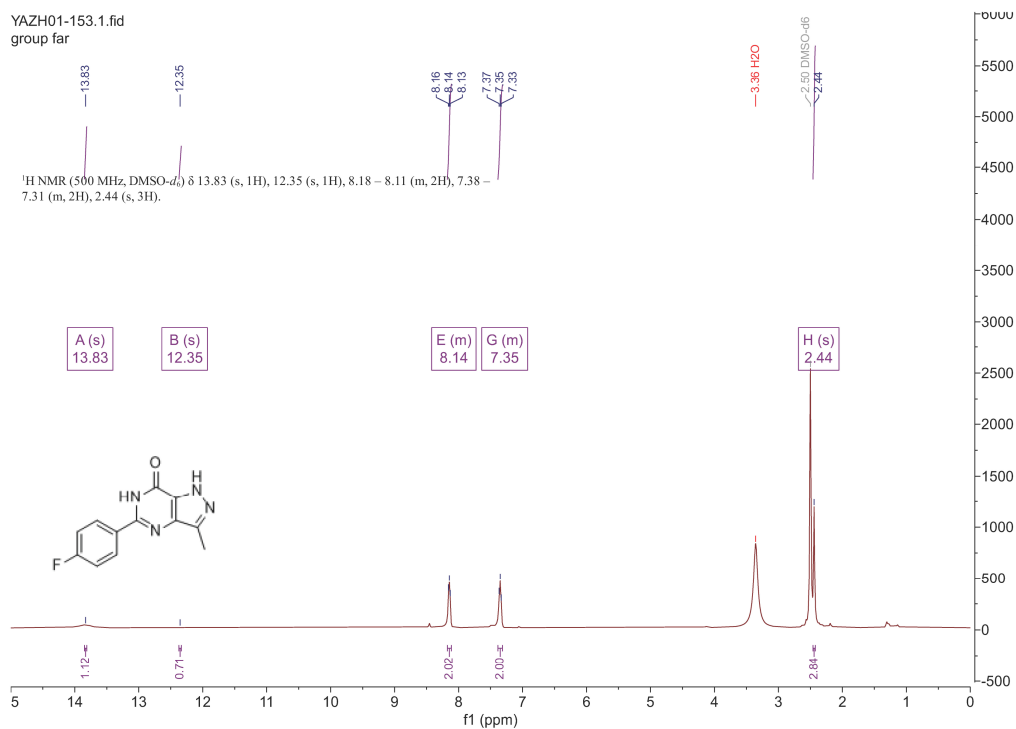

Figure S131. <sup>1</sup>H NMR spectrum of compound **31e**.

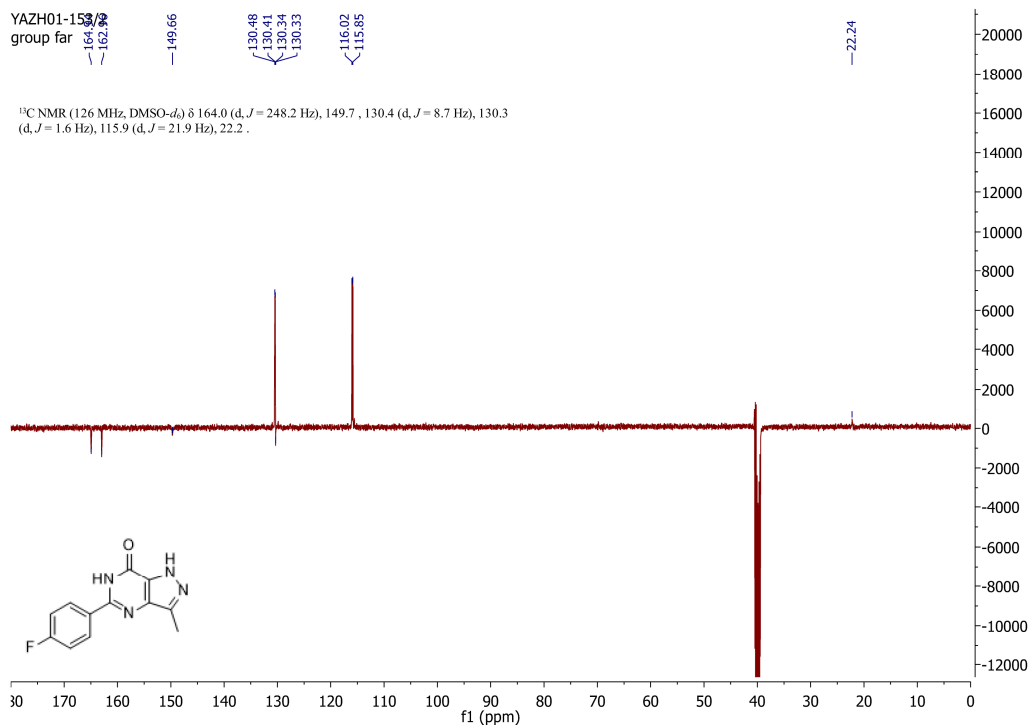

Figure S132. <sup>13</sup>C NMR spectrum of compound **31e**.

Acquired by : Admin  
 Date Acquired : 18/6/2019 3:39:49 PM  
 Sample Name : VUF16375  
 Sample ID :  
 Tray# : 1  
 Vial# : 35  
 Injection Volume : 5  
 Data File : C:\LabSolutions\Data\2019\2019-wk25\VUF16375.lcd  
 Background File : blanco 18062019.lcd  
 Method File : Method SCAN ACID standard.lcm  
 Report Format : DefaultLCMS.lcr  
 Tuning File : C:\LabSolutions\Tuning\Tuning-ESI-pos-neg01072015a.lct  
 Processed by : Admin  
 Modified Date : 18/6/2019 3:51:25 PM

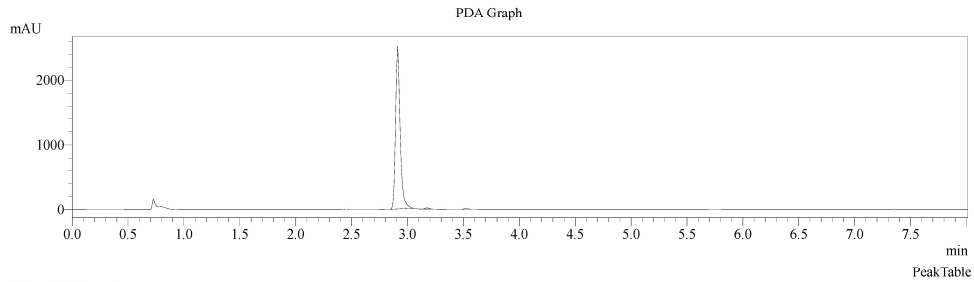

PDA Ch1 254nm 4nm

| Peak# | Name | Ret. Time | Area    | Area % |
|-------|------|-----------|---------|--------|
| 1     |      | 2.906     | 7092524 | 98.714 |
| 2     |      | 3.170     | 46741   | 0.651  |
| 3     |      | 3.517     | 45662   | 0.636  |

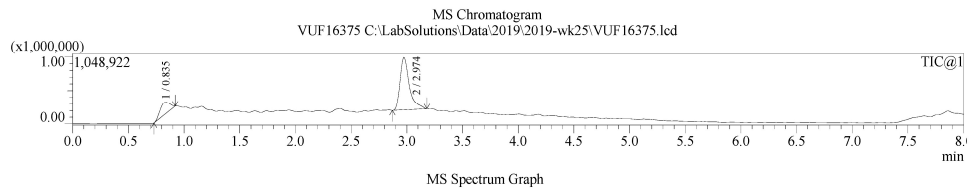

#:1 Ret.Time:Averaged 2.960-2.980(Scan#:297-299)  
 BG Mode:Calc 2.870<->3.180(288<->319)  
 Mass Peaks:17 Base Peak:231.00(441377) Polarity:Pos Segment1 - Event1

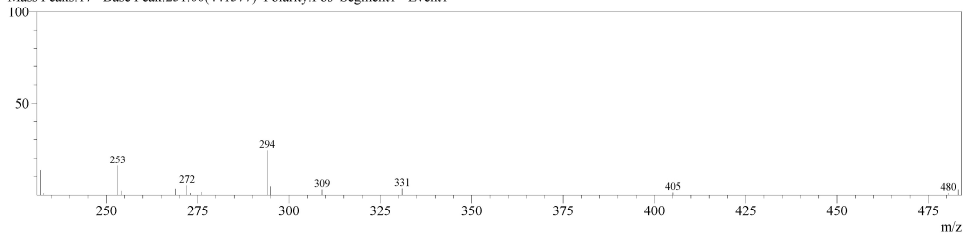

MS Spectrum Table

#:1 Ret.Time:  
BG Mode:Calc 2.870<->3.180(288<->319)  
Mass Peaks:17 Base Peak:231.00(441377) Polarity:Pos Segment1 - Event1

| # | m/z    | Abs.Inten. | Rel.Inten. | Charge | Polarity | Monoisotopic | #  | m/z    | Abs.Inten. | Rel.Inten. | Charge | Polarity | Monoisotopic |
|---|--------|------------|------------|--------|----------|--------------|----|--------|------------|------------|--------|----------|--------------|
| 1 | 231.00 | 441377     | 100.00     |        |          |              | 10 | 294.00 | 107749     | 24.41      |        |          |              |
| 2 | 231.95 | 58109      | 13.17      |        |          |              | 11 | 294.95 | 19940      | 4.52       |        |          |              |
| 3 | 232.90 | 4546       | 1.03       |        |          |              | 12 | 309.00 | 12625      | 2.86       |        |          |              |
| 4 | 253.05 | 69571      | 15.76      |        |          |              | 13 | 330.95 | 14689      | 3.33       |        |          |              |
| 5 | 254.05 | 9430       | 2.14       |        |          |              | 14 | 405.10 | 5598       | 1.27       |        |          |              |
| 6 | 269.00 | 14447      | 3.27       |        |          |              | 15 | 480.45 | 4520       | 1.02       |        |          |              |
| 7 | 272.05 | 22163      | 5.02       |        |          |              | 16 | 483.15 | 12558      | 2.85       |        |          |              |
| 8 | 273.00 | 4580       | 1.04       |        |          |              | 17 | 484.15 | 4810       | 1.09       |        |          |              |
| 9 | 276.10 | 6628       | 1.50       |        |          |              |    |        |            |            |        |          |              |

Figure S133. LCMS spectrum of compound **31f**.

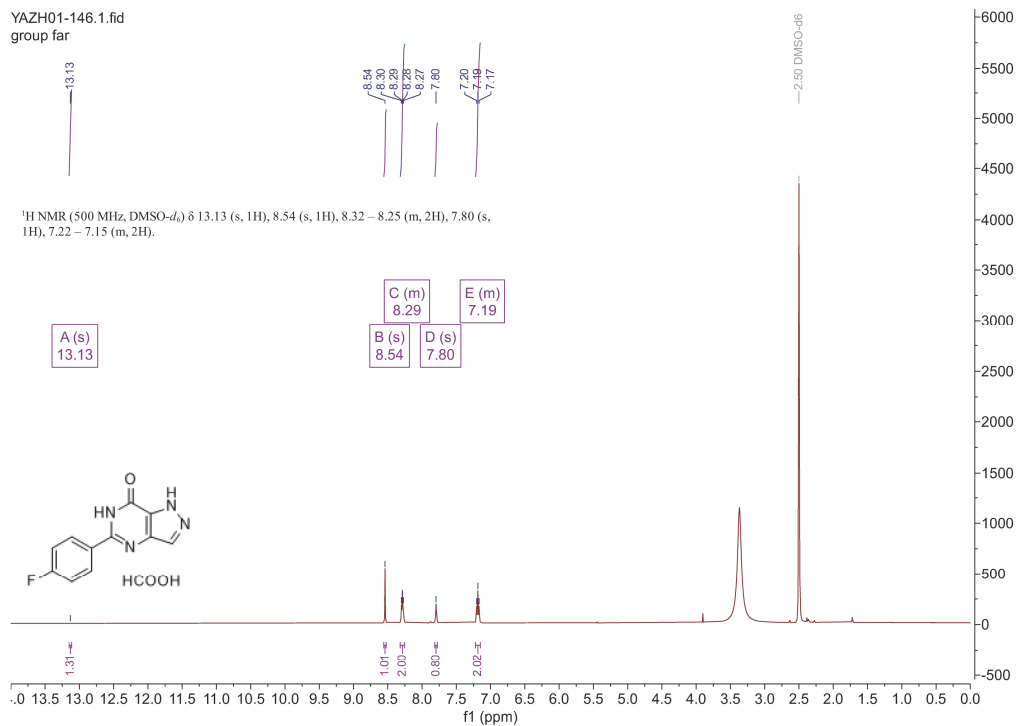

Figure S134. <sup>1</sup>H NMR spectrum of compound **31f**.

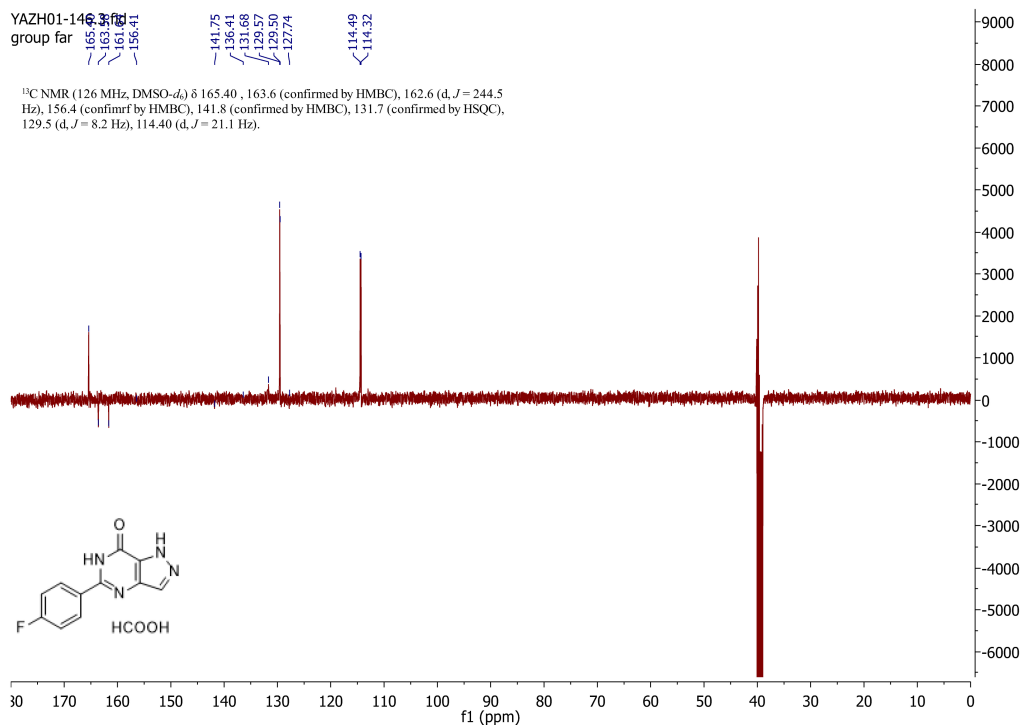

Figure S135. <sup>13</sup>C NMR spectrum of compound **31f**.

Acquired by : Admin  
 Date Acquired : 21/2/2019 2:41:40 PM  
 Sample Name : LABI-009-NANP  
 Sample ID :  
 Tray# : 1  
 Vial# : 11  
 Injection Volume : 1  
 Data File : C:\LabSolutions\Data\2019\2019-wk07\LABI-009-NANP.lcd  
 Background File : blanco 21022019.lcd  
 Method File : Method SCAN ACID standard.lcm  
 Report Format : Default.LCMS.lcr  
 Tuning File : C:\LabSolutions\Tuning\Tuning-ESI-pos-neg01072015a.lct  
 Processed by : Admin  
 Modified Date : 19/7/2019 12:06:34 PM

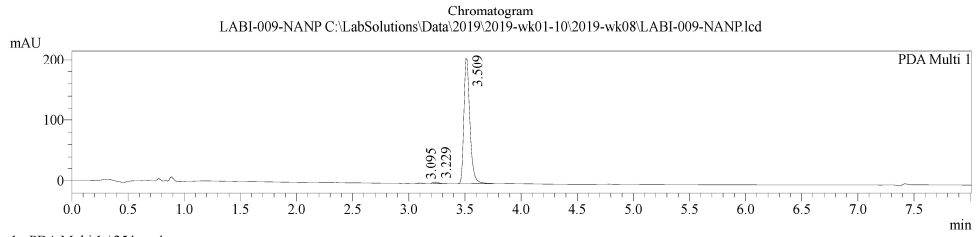

PeakTab1

| Peak# | Name | Ret. Time | Area   | Area % |
|-------|------|-----------|--------|--------|
| 1     |      | 3.095     | 2251   | 0.291  |
| 2     |      | 3.229     | 8753   | 1.130  |
| 3     |      | 3.509     | 763389 | 98.579 |

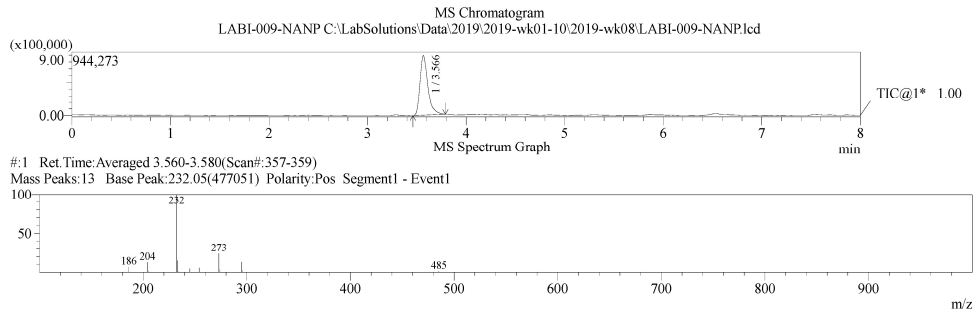

MS Spectrum Table

#1 Ret.Time:  
BG Mode:Calc 3.460<->3.790(347<->380)  
Mass Peaks:13 Base Peak:232.05(477051) Polarity:Pos Segment1 - Event1

| # | m/z    | Abs.Inten. | Rel.Inten. | Charge | Polarity | Monoisotopic | #  | m/z    | Abs.Inten. | Rel.Inten. | Charge | Polarity | Monoisotopic |
|---|--------|------------|------------|--------|----------|--------------|----|--------|------------|------------|--------|----------|--------------|
| 1 | 185.00 | 31347      | 6.37       |        |          |              | 8  | 254.05 | 26742      | 5.61       |        |          |              |
| 2 | 204.05 | 59882      | 12.55      |        |          |              | 9  | 273.10 | 113864     | 23.87      |        |          |              |
| 3 | 205.05 | 7954       | 1.67       |        |          |              | 10 | 274.10 | 16207      | 3.40       |        |          |              |
| 4 | 232.05 | 477051     | 100.00     |        |          |              | 11 | 295.10 | 62053      | 13.01      |        |          |              |
| 5 | 233.05 | 70683      | 14.82      |        |          |              | 12 | 296.05 | 10037      | 2.10       |        |          |              |
| 6 | 234.05 | 5072       | 1.06       |        |          |              | 13 | 485.25 | 5272       | 1.11       |        |          |              |
| 7 | 245.05 | 22245      | 4.66       |        |          |              |    |        |            |            |        |          |              |

Figure S136. LCMS spectrum of compound 33.



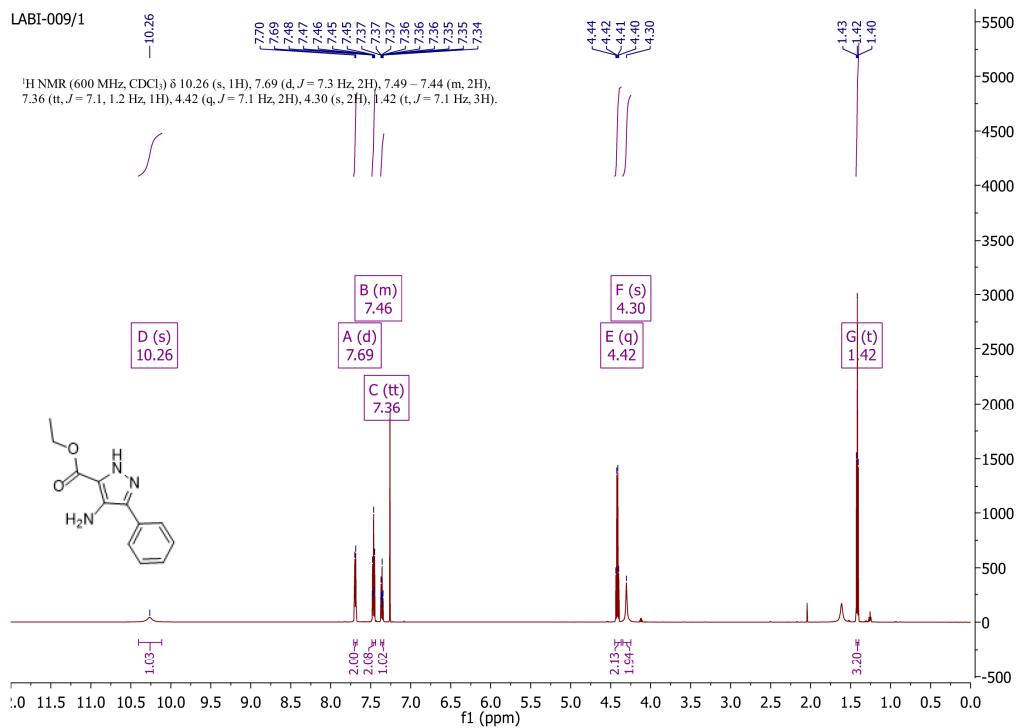

Figure S137. <sup>1</sup>H NMR spectrum of compound **33**.

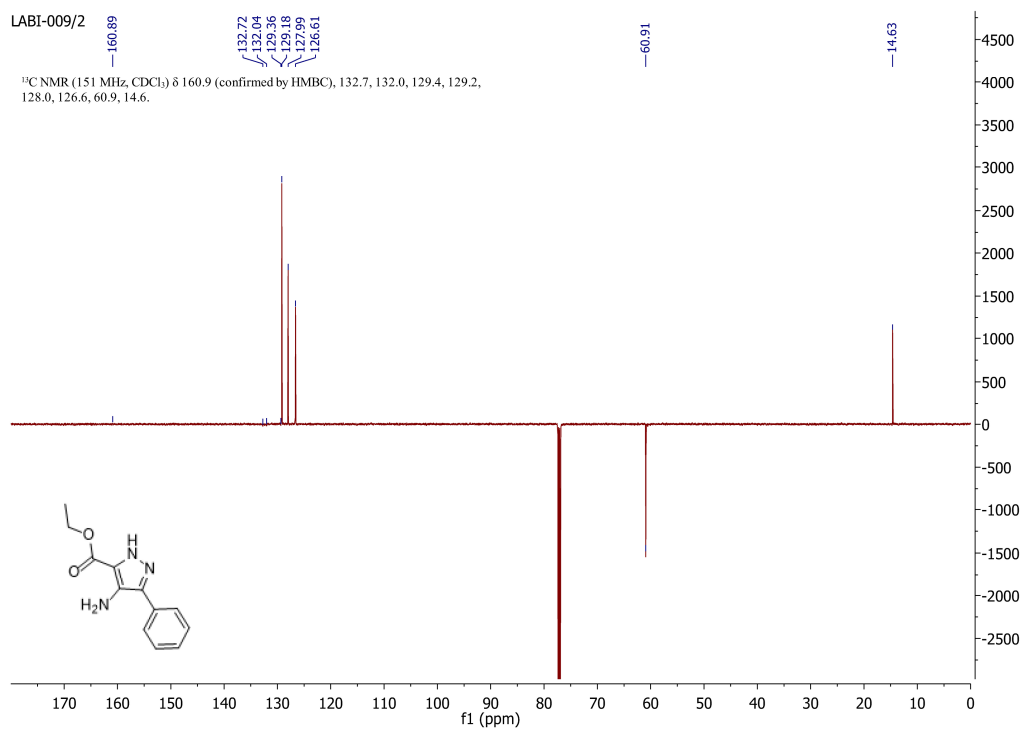

Figure S138. <sup>13</sup>C NMR spectrum of compound **33**.

Acquired by : Admin  
 Date Acquired : 18/3/2019 2:12:47 PM  
 Sample Name : LABI-22-FINAL-2  
 Sample ID :  
 Tray# : 1  
 Vial# : 34  
 Injection Volume : 3  
 Data File : C:\LabSolutions\Data\2019\2019-wk11\LABI-22-FINAL-2.lcd  
 Background File : blanco 18032019.lcd  
 Method File : Method SCAN ACID standard.lcm  
 Report Format : Default.LCMS.lcr  
 Tuning File : C:\LabSolutions\Tuning\Tuning-ESI-pos-neg01072015a.lct  
 Processed by : Admin  
 Modified Date : 18/3/2019 2:23:04 PM

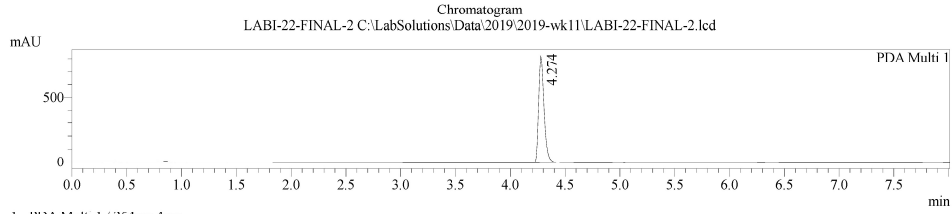

PeakTable

| Peak# | Name | Ret. Time | Area    | Area %  |
|-------|------|-----------|---------|---------|
| 1     |      | 4.274     | 2829474 | 100.000 |

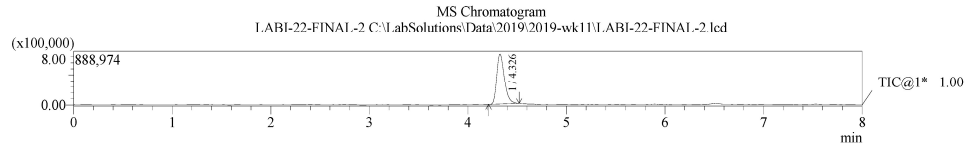

MS Spectrum Graph

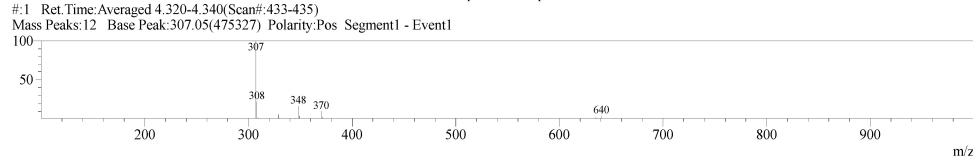

MS Spectrum Table

#1 Ret.Time:  
BG Mode:Calc 4.210<->4.520(422<->453)  
Mass Peaks:12 Base Peak:307.05(475327) Polarity:Pos Segment1 - Event1

| # | m/z    | Abs.Inten. | Rel.Inten. | Charge | Polarity | Monoisotopic | #  | m/z    | Abs.Inten. | Rel.Inten. | Charge | Polarity | Monoisotopic |
|---|--------|------------|------------|--------|----------|--------------|----|--------|------------|------------|--------|----------|--------------|
| 1 | 307.05 | 475327     | 100.00     |        |          |              | 7  | 348.10 | 79010      | 16.62      |        |          |              |
| 2 | 308.05 | 105556     | 22.21      |        |          |              | 8  | 349.10 | 18277      | 3.85       |        |          |              |
| 3 | 309.40 | 8327       | 1.75       |        |          |              | 9  | 370.10 | 47873      | 10.07      |        |          |              |
| 4 | 328.95 | 28045      | 5.90       |        |          |              | 10 | 371.10 | 11539      | 2.43       |        |          |              |
| 5 | 330.00 | 5891       | 1.24       |        |          |              | 11 | 635.20 | 9222       | 1.94       |        |          |              |
| 6 | 344.95 | 5676       | 1.19       |        |          |              | 12 | 640.50 | 20656      | 4.35       |        |          |              |

Figure S139. LCMS spectrum of compound 35.

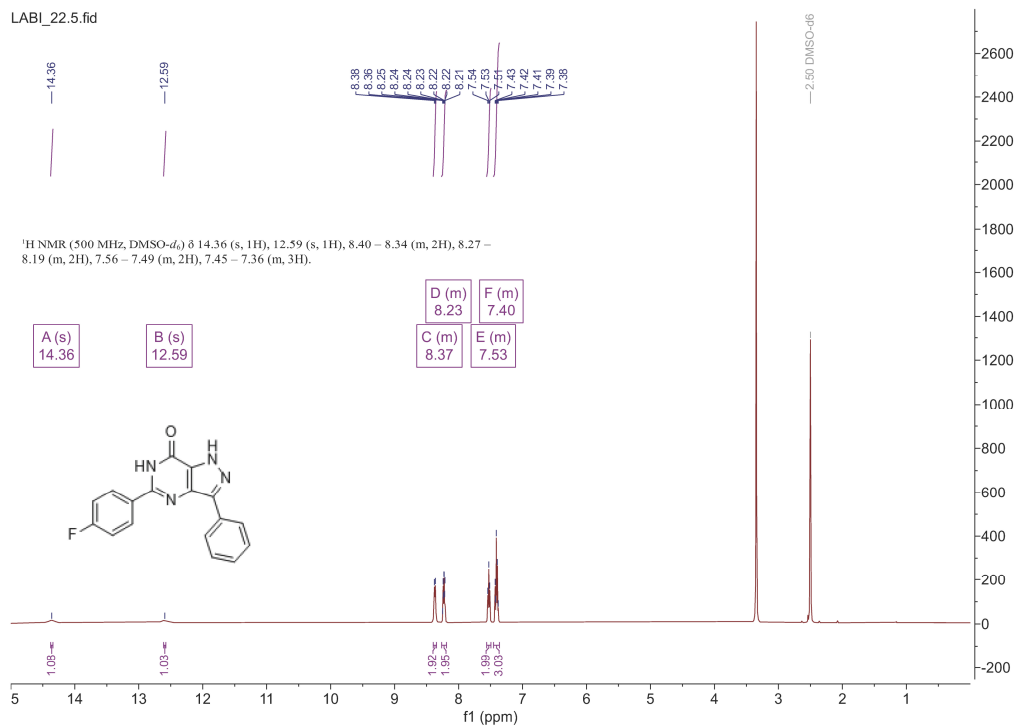

Figure S140. <sup>1</sup>H NMR spectrum of compound 35.

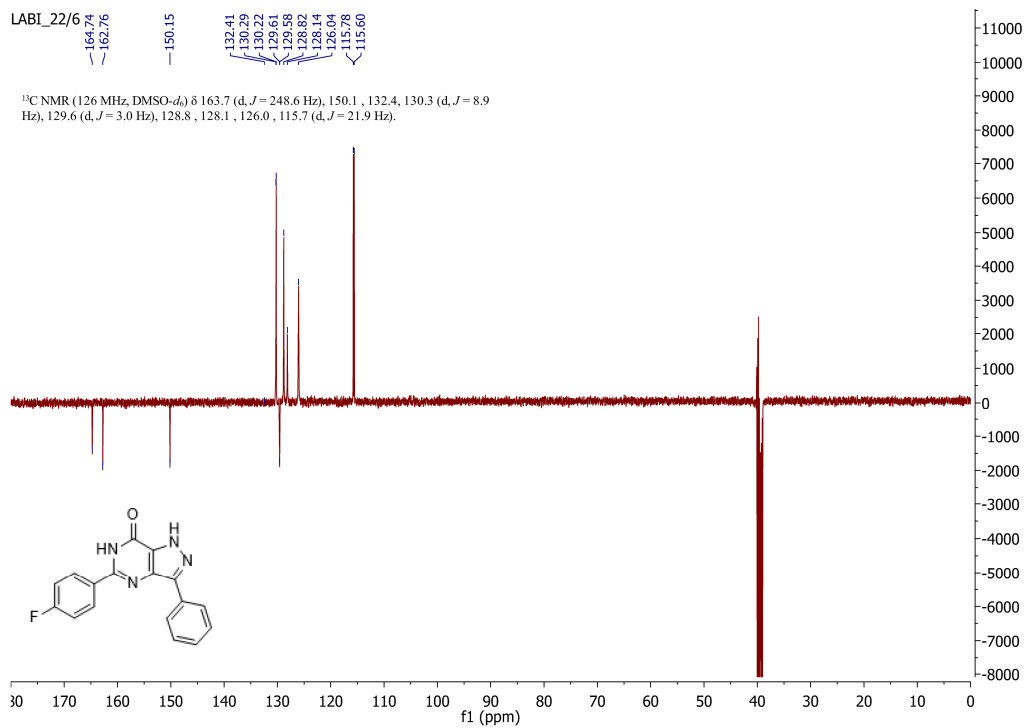

Figure S141. <sup>13</sup>C NMR spectrum of compound 35.
